# Supplementary material
Source: HighWire-hosted journal article supplement (https://bjsm.bmj.com/content/57/12/810)
Supplement: inline-supplementary-material-1 [file inline-supplementary-material-1.pdf]

## Online Supplementary Material

# Examining Later-in-Life Health Risks Associated with Sport-Related Concussions and Repetitive Head Impacts: A Systematic Review of Case-Control and Cohort Studies

1  
2  
3  
4  
5  
6  
7  
8  
9  
10  
11  
12  
13  
14  
15  
16  
17  
18  
19  
20  
21  
22  
23

### Table of Contents

|                                                                                              |    |
|----------------------------------------------------------------------------------------------|----|
| Authors and Affiliations .....                                                               | 2  |
| Disclosures .....                                                                            | 4  |
| The Need for Case-Control and Cohort Studies .....                                           | 7  |
| Studies Not Included in this Systematic Review .....                                         | 9  |
| Narrative Review of Studies of Former Amateur Athletes.....                                  | 10 |
| Narrative Review of Studies of Former Professional Athletes .....                            | 12 |
| Methodological Considerations and Limitations with the Studies Included in this Review ..... | 17 |
| Chronic Traumatic Encephalopathy (CTE) Narrative Review .....                                | 19 |
| Historical Synopsis of Chronic Traumatic Encephalopathy .....                                | 24 |
| Appendix A. Search Strategy.....                                                             | 27 |
| Appendix B. References .....                                                                 | 63 |

## 24 Authors and Affiliations

25

26 Grant L. Iverson

27 Department of Physical Medicine and Rehabilitation, Harvard Medical School, Boston,  
28 Massachusetts, USA; Sports Concussion Program, MassGeneral Hospital for Children, Boston,  
29 Massachusetts, USA; Department of Physical Medicine and Rehabilitation, Spaulding  
30 Rehabilitation Hospital, Charlestown, Massachusetts, USA; Department of Physical Medicine  
31 and Rehabilitation, Schoen Adams Research Institute at Spaulding Rehabilitation, Charlestown,  
32 Massachusetts, USA

33

34 Rudolph J. Castellani

35 Department of Pathology, Northwestern University Feinberg School of Medicine, Chicago,  
36 Illinois, USA

37

38 J. David Cassidy

39 Division of Epidemiology, Dalla Lana School of Public Health, University of Toronto, Ontario,  
40 Canada

41

42 Geoff M. Schneider

43 Department of Radiology, Cumming School of Medicine, University of Calgary, Calgary,  
44 Alberta, Canada

45

46 Kathryn J. Schneider

47 Sport Injury Prevention Research Centre, Faculty of Kinesiology, Alberta Children's Hospital  
48 Research Institute; Hotchkiss Brain Institute; Sport Medicine Centre, University of Calgary,  
49 Calgary, Alberta, Canada

50

51 Ruben J. Echemendia

52 University Orthopedic Centre – Concussion Care Clinic, State College, PA, USA  
53 Department of Psychology, University of Missouri – Kansas City, Kansas City, MO, USA

54

55 Julian E. Bailes

56 Department of Neurosurgery, NorthShore University HealthSystem, Evanston, IL, USA.  
57 University of Chicago Pritzker School of Medicine, Chicago, IL, USA.

58

59 K. Alix Hayden

60 Libraries and Cultural Resources, University of Calgary, Calgary, Alberta, Canada

61

62 Inga Koerte

63 cBRAIN, Department of Child and Adolescent Psychiatry, Psychosomatics, And Psychotherapy,  
64 University Hospital, Ludwig-Maximilians-Universität, Munich, Germany; Psychiatry  
65 Neuroimaging Laboratory, Department of Psychiatry, Brigham And Women's Hospital, Mass  
66 General Brigham, Boston, MA, USA; Department of Psychiatry, Massachusetts General  
67 Hospital, Mass General Brigham, Boston, MA, USA

68

- 69 Geoffrey T. Manley  
70 Department of Neurosurgery, University of California San Francisco, San Francisco, California,  
71 USA  
72
- 73 Michael McNamee  
74 Department of Movement Sciences, KU Leuven, Belgium  
75 School of Sport and Exercise Sciences, Swansea University, UK  
76
- 77 Jon S Patricios  
78 Wits Sport and Health (WiSH), School of Clinical Medicine, Faculty of Health Sciences,  
79 University of the Witwatersrand, Johannesburg, South Africa  
80
- 81 Charles H. Tator  
82 Canadian Concussion Centre, Toronto Western Hospital,  
83 Department of Surgery and Division of Neurosurgery,  
84 Temerty Faculty of Medicine,  
85 University of Toronto,  
86 Toronto, Ontario, Canada  
87
- 88 Robert C. Cantu  
89 Department of Neurology, Boston University School of Medicine, Boston, MA, USA; Robert C.  
90 Cantu Concussion Center, Emerson Hospital, Concord, MA, USA  
91
- 92 Jiri Dvorak  
93 Schulthess Clinic Zurich, Zurich, Switzerland  
94

## 95 Disclosures

96

97 Grant Iverson serves as a scientific advisor for NanoDX®, Sway Operations, LLC, and  
98 Highmark, Inc. He has a clinical and consulting practice in forensic neuropsychology, including  
99 expert testimony, involving individuals who have sustained mild TBIs (including former  
100 athletes), and on the topic of suicide. He has received past research support or funding from  
101 several test publishing companies, including ImPACT Applications, Inc., CNS Vital Signs, and  
102 Psychological Assessment Resources (PAR, Inc.). He receives royalties from the sales of one  
103 neuropsychological test (WCST-64). He has received travel support and honorariums for  
104 presentations at conferences and meetings. He has received research funding as a principal  
105 investigator from the National Football League, and subcontract grant funding as a collaborator  
106 from the Harvard Integrated Program to Protect and Improve the Health of National Football  
107 League Players Association Members. He has received research funding from the Wounded  
108 Warrior Project™. He acknowledges unrestricted philanthropic support from ImPACT  
109 Applications, Inc., the Mooney-Reed Charitable Foundation, the National Rugby League, Boston  
110 Bolts, and the Schoen Adams Research Institute at Spaulding Rehabilitation.

111

112 Rudolph J. Castellani is a collaborator on a grant funded by the National Football League to  
113 study the spectrum of concussion, including possible long-term effects. He has a consulting  
114 practice in forensic neuropathology, including expert testimony, which has involved former  
115 athletes at amateur and professional levels.

116

117 J. David Cassidy has provided expert epidemiological testimony in court cases on the long-term  
118 effects of concussions in sports.

119

120 Geoff Schneider is an owner of a multidisciplinary practice (managing patients with MSK pain  
121 disorders). He is a board member of Hockey Calgary (Calgary, AB, Canada) and Chair of the  
122 Alberta Association of Physiotherapy. He received funding for the administrative aspects of the  
123 writing of two of the systematic reviews that informed the consensus process.

124

125 Kathryn Schneider has received grant funding from the Canadian Institutes of Health Research,  
126 National Football League Scientific Advisory Board, International Olympic Committee Medical  
127 and Scientific Research Fund, World Rugby, Mitacs Accelerate, University of Calgary) with  
128 funds paid to her institution and not to her personally. She is an Associate Editor of BJSM  
129 (unpaid) and has received travel and accommodation support for meetings where she has  
130 presented. She is coordinating the writing of the systematic reviews that will inform the 6<sup>th</sup>  
131 International Consensus on Concussion in Sport, for which she has received an educational grant  
132 to assist with the administrative costs associated with the writing of the reviews. She is a member  
133 of the AFL Concussion Scientific Committee (unpaid position) and Brain Canada (unpaid  
134 positions). She works as a physiotherapy consultant and treats athletes of all levels of sport from  
135 grass roots to professional.

136

137 Ruben J. Echemendia is a paid consultant for the NHL and cochair of the NHL / NHLPA  
138 Concussion Subcommittee. He is also a paid consultant and chair of the Major League Soccer  
139 concussion committee, and a consultant to the US Soccer Federation. He previously served as a  
140 neuropsychology consultant to Princeton University Athletic Medicine and EyeGuide. He is

141 currently a co-PI for a grant funded by the NFL (NFL-Long) through Boston Children's  
142 Hospital. He occasionally provides expert testimony in matters related to MTBI and sports  
143 concussion, and occasionally receives honoraria and travel support/reimbursement for  
144 professional meetings.

145

146 Julian E. Bailes serves as the Chairman of the Medical Advisory Committee of Pop Warner  
147 Football, Inc, and is a member of the NFL Head, Neck, and Spine Committee, NFLPA Mackey-  
148 White Health and Safety Committee, and the NCAA Concussion Task Force, all without  
149 remuneration. He is a consultant for BrainLab, Inc. and has provided expert testimony on TBI  
150 medicolegal cases.

151

152 K. Alix Hayden has no disclosures.

153

154 Inga Koerte is a professor at Ludwig-Maximilians-Universität Munich (paid position). She  
155 serves as European Editor at Journal of Neurotrauma (unpaid position) and as Vice President of  
156 the European Neurotrauma Organization (unpaid position). She receives research grant funding  
157 from the National Institutes of Health, the European Research Council, the German Ministry for  
158 Research and Education. She receives funding for a research study on sport-related concussion  
159 from Abbott Inc. The University hospital received donations for her research from the Schatt  
160 Foundation and Mary Ann Liebert Inc. She receives royalties for book chapters published by  
161 Thieme Publishers. Her spouse is employee at Siemens and she thus holds stock options at  
162 Siemens and Siemens Healthineers. In-kind contribution: PhD students working under her  
163 supervision receive scholarships from the Villigst Foundation, the China Scholarship Council  
164 collaboration with Ludwig-Maximilians-University Munich, and Fulbright.

165

166 Geoff Manley discloses grants from the United States Department of Defense – TBI Endpoints  
167 Development Initiative (Grant #W81XWH-14-2-0176), TRACK-TBI Precision Medicine (Grant  
168 # W81XWH-18-2-0042), and TRACK-TBI NETWORK (Grant # W81XWH-15-9-0001); NIH-  
169 NINDS – TRACK-TBI (Grant #U01NS086090); and the National Football League (NFL)  
170 Scientific Advisory Board – TRACK-TBI LONGITUDINAL. United States Department of  
171 Energy supports Dr. Manley for a precision medicine collaboration. One Mind has provided  
172 funding for TRACK-TBI patients stipends and support to clinical sites. He has received an  
173 unrestricted gift from the NFL to the UCSF Foundation to support research efforts of the  
174 TRACK-TBI NETWORK. Dr. Manley has also received funding from NeuroTrauma Sciences  
175 LLC to support TRACK-TBI data curation efforts. Additionally, Abbott Laboratories has  
176 provided funding for add-in TRACK-TBI clinical studies.

177

178 Michael McNamee has the following disclosures: (i) Chair, Ethics Expert Group, WADA (2021-  
179 23) (paid); (ii) Member, International Boxing Association, Ethics and Integrity Committee,  
180 (2021-2; resigned Oct 2022) (paid); (iii) Chair, Therapeutic Use Exemption Fairness Committee  
181 (2020-) (paid); (iv) Member, Steering Group, Sex Segregation in Sport, IAAF/World Athletics,  
182 (2019-20) (unpaid); (v) Member, International Ice Hockey Federation, Ethics and Integrity  
183 Committee (2019-21) (paid); (vi) Member, IOC Consensus Statement Expert Group on Injuries  
184 in Children and Adolescents (2017) (unpaid); (vii) Member, Ethics Expert Group, WADA  
185 (2016-21) (unpaid); and (viii) Member, IOC Consensus Statement Expert Group on Pain  
186 Management (2016) (unpaid).

187

188 Jon S. Patricios is a sports and exercise medicine physician at Waterfall Sports Orthopaedic  
189 Surgery, Johannesburg, South Africa. He is Director of Sports Concussion South Africa and a  
190 Visiting Professor, Wits Sport and Health (WiSH), School of Clinical Medicine, Faculty of  
191 Health Sciences, University of the Witwatersrand. As an Editor of BJSM he receives an  
192 honorarium and serves as a consultant (unremunerated) to World Rugby Concussion Advisory  
193 Group, South African Rugby, EyeGuide™ Scientific Advisory Board, and the Union of  
194 European Football Associations (UEFA). He is Co-chair of the Scientific Committee, 6<sup>th</sup>  
195 International Conference on Concussion in Sport (unpaid), and a Board member of the  
196 Concussion in Sport Group (unpaid)

197

198 Charles H. Tator has no disclosures.

199

200 Robert Cantu serves as a scientific advisor for the National Football League's (NFL) Head Neck  
201 and Spine Committee, VP and Chair of the Scientific Advisory Committee for the National  
202 Operating Committee on Standards for Athletic Equipment (NOCSAE), and as Co-founder and  
203 Medical Director of the Concussion Legacy Foundation. He currently receives research support  
204 from the NINDS UNITE and Diagnose CTE grants. He has received travel support and  
205 honorariums for presentations at conferences and meetings. He receives royalties from Houghton  
206 Mifflin Harcourt publishing. He has a clinical and consulting practice in forensic neurology and  
207 neurosurgery, including expert testimony, especially individuals with traumatic brain and spinal  
208 cord injuries. He is a member of the National Collegiate Athletic Association Student-Athlete  
209 Concussion Injury Litigation Medical Science Committee.

210

211 Jiri Dvorak has no disclosures.

212

## 213 The Need for Case-Control and Cohort Studies

214

215 There is a large and steadily growing body of cross-sectional studies on problems with brain  
216 health, broadly defined, in former amateur and professional athletes, and these studies have been  
217 the focus of multiple prior narrative and systemic reviews [1-28]. Cross-sectional studies, using  
218 samples of convenience, are important for searching for associations, generating hypotheses, and  
219 providing directions for more definitive causal research. For example, a cross-sectional, also  
220 known as a prevalence study or survey, might find that former athletes report greater (or lesser)  
221 symptoms of depression than a control sample, and that same study might show an association  
222 between depression and chronic pain or depression and a self-reported history of sustaining  
223 multiple concussions. However, cross-sectional studies are not sufficient to draw conclusions  
224 about the incidence or the risk of depression in former athletes.

225

226 Case series are often the first type of study to appear when investigating new entities that may  
227 not have an established clinical diagnostic phenotype in living patients and may only have a  
228 pathological definition, such as is currently the case with chronic traumatic encephalopathy  
229 neuropathologic change (CTE-NC) [29, 30]. These are important because they raise hypotheses  
230 to be investigated in future cohort and case-control studies, and they can be viewed as the first  
231 step in causal investigations in medicine. Cross-sectional studies also appear early in the process  
232 of examining health risk factors and long-term outcomes because they are cost-effective,  
233 feasible, and relatively easy to complete because there is no active follow-up period. However,  
234 because they are a snapshot in time, they include only prevalent cases which limits the ability to  
235 infer causation [31]. For example, some case series or cross-sectional studies recruit available  
236 cases, often from a clinical setting. These prevalent or available cases differ from incident cases  
237 used in cohort and case-control studies in that they are missing those that have recovered,  
238 emigrated, died, or are lost to follow up for other reasons. Available prevalent cases would have  
239 a different and usually worse prognosis than an inception cohort of incident cases. Thus, the  
240 factors associated with prevalent cases might clearly differ from those associated with incident  
241 cases [32]. Moreover, it can be difficult to place exposures, confounders, and outcomes in an  
242 appropriate timeline in cross-sectional studies because they are all measured at the same time.  
243 Case series and cross-sectional studies are not designed to examine causal relationships but help  
244 direct research efforts to examine these issues in more rigorous study designs [32, 33].

245

246 To more definitively study potential negative long-term effects of concussions and repetitive  
247 head impacts, or exposure to contact sports, specific research designs are required. Longitudinal  
248 study designs that include an exposed and unexposed group from a population at risk of the  
249 outcome are required. Specifically, cohort studies and case control designs are suited for this  
250 type of investigation. Implicit in these designs is the careful control of confounding factors, or  
251 factors that are associated with or 'travel together' with the exposure of interest and are not  
252 intermediate factors directly along the path from cause to effect [34]. This is extremely important  
253 when dealing with long lag-times between exposures and outcomes, such as playing a sport  
254 during adolescence or young adulthood and determining the cause of dementia many decades  
255 later. For example, when studying risk factors for dementia in older adults there are a number of  
256 factors of potential importance to try to measure and control for, such as genetic factors, level of  
257 education, socioeconomic status and social determinants of health, cognitive reserve,

258 hypertension, diabetes, alcohol misuse, sleep apnea, hearing loss, peripheral vascular disease,  
259 and small vessel ischemic disease [35-39].  
260  
261 Cohort studies inception incident cases and directly measure risk by dividing the incidence of the  
262 outcome in the exposed by the incidence of the outcome in the unexposed producing a direct  
263 measure of risk or the relative risk (RR). Alternatively, case-control studies estimate the relative  
264 risk by comparing the odds of exposure in cases divided by the odds of exposure in controls  
265 producing an odds ratio (OR). Care must be taken to ensure that the outcome of interest is an  
266 uncommon or rare event in case control studies or the odds ratio will overestimate the relative  
267 risk [40]. Case-control studies are retrospective by design and as a rule, cohort studies provide  
268 more accurate estimates of risk than case-control studies. The most informative case-control  
269 studies are nested in an inception cohort of incident cases.  
270



271 **Studies Not Included in this Systematic Review**

272

273 ➤ Numerous postmortem studies relating to chronic traumatic encephalopathy neuropathologic  
274 change (CTE-NC) in former athletes have been published over the past 17 years [22, 41-47],  
275 as well as many published reviews [4, 14, 16-23, 25-28, 48-63].

276

277 ➤ There is also a body of literature relating to neuroimaging in former athletes [2, 12].

278

279 ➤ None of these postmortem studies or neuroimaging studies were included in this systematic  
280 review because they are not case-control or cohort studies that can examine risk.

281

282 ➤ It was decided, a priori, by the author group that planned this systematic review, to identify  
283 studies in the world literature that were case-control or cohort studies that might yield  
284 evidence relating to inferences about future risk to former athletes.

285

286 ➤ No studies included in this review examined possible long-term effects in women, and thus  
287 we can draw no conclusions relating to women.

288

289 ➤ There were also no studies of former university or college-level athletes that met criteria for  
290 inclusion in this review.

291

292 ➤ One of our review questions pertained to age of first exposure to contact or collision sports  
293 and whether earlier age was associated with worse later in life brain health [15, 64-67]. There  
294 were no studies on this topic included in this review, and we cannot draw any conclusions.

295

## 296 Narrative Review of Studies of Former Amateur Athletes

297

298 There were 10 studies of former amateur athletes [68-77]. Depression, anxiety, or both were  
299 included in five studies of former amateur athletes, mostly football players, and none of these  
300 studies identified an increased risk for these mental health problems in former contact or  
301 collision sport athletes [68-70, 72, 73]. Data from the National Longitudinal Study of Adolescent  
302 to Adult Health [78] was used in four of the studies included in this review [69, 70, 72, 73]. This  
303 study began during the 1994-1995 school year when the participants were adolescents (Wave I).  
304 The studies used survey data from when the participants were a median age of 22 (Wave III,  
305 2001-2001; age IQR=20-23), 29 (Wave IV, 2007-2009, age IQR=28-31), and 38 (Wave V,  
306 2016-2018, age IQR=36-40). Men who reported the intention to play high school football during  
307 their adolescence, when surveyed later in life, at the average age of 29 and 38, did not report a  
308 greater lifetime history of anxiety [69, 72] or depression [69, 70, 72, 73], greater mental health  
309 treatment in the past year [69, 70], or current symptoms of depression (i.e., within the past seven  
310 days) [69, 72]. Moreover, playing high school football was not associated with suicidal ideation  
311 at an average age of 22 [70], 29 [70, 72, 73], or 38 [69]. Collectively, none of these studies found  
312 an association between high school football participation and risk for future mental health  
313 problems or suicidality over course of this 20-25-year longitudinal study. A methodological  
314 limitation of these studies is that while in high school the boys were surveyed a single time about  
315 their intention to play football; it could not be determined whether they actually did play football,  
316 or for how many years, or their positions, or their playing time.

317

318 Deshpande and colleagues [68], using data from the Wisconsin Longitudinal Study, examined  
319 the association between playing high school football and the experience of cognitive impairment  
320 or depression, decades later, at the age of 65, in a sample of 3,904 men. The primary outcome  
321 cognitive functioning was based on neuropsychological testing and the other primary outcome  
322 relied on a self-report measure for symptoms of depression. Secondary outcomes, such as anger,  
323 anxiety, and heavy use of alcohol, were also examined. They reported that former football  
324 players had similar primary outcomes at the age of 65 as those who did not play football, and  
325 similar secondary outcomes at ages 54, 65, and 72.

326

327 Two studies examined whether playing high school football was associated with increased risk  
328 for later in life neurodegenerative diseases, and these studies noted that playing high school  
329 football was not associated with increased risk for dementia, Parkinson's disease, or ALS [74,  
330 75]. Savica and colleagues [75] examined the medical records from 438 former athletes who  
331 played high school football during the period 1946-1956 for the presence of neurological or  
332 neurodegenerative diseases. They were compared to 140 men who did not play sports. There  
333 were no significant differences between groups in the proportions with neurological or  
334 neurodegenerative diseases. Janssen and colleagues [74] used a similar methodology as Savica et  
335 al. and examined the medical records of 296 men who played high school football between 1956-  
336 1970. They were compared to 190 men who participated in other sports during high school (i.e.,  
337 swimming, basketball, and wrestling). There were no significant differences between groups in  
338 the proportions with neurological or neurodegenerative diseases.

339

340 Porter [76] conducted a 9-year longitudinal study of a small sample of amateur boxers compared  
341 to age and socioeconomically similar control subjects. The control sample was not allowed to

342 participate in combat sports, but could participate in contact or collision sports. The samples  
343 underwent neuropsychological testing on five occasions over 9 years. The boxers did not show  
344 evidence of decline in neuropsychological functioning, over the 9 years, in comparison to the  
345 controls.

346

347 Valenti and colleagues [77], using a case-control study design, examined the sporting history of  
348 300 people who had been clinically diagnosed as having ALS. The patients were identified from  
349 10 national (in Italy) centers for the diagnosis and treatment of ALS. The controls were matched  
350 on age, sex, and neighborhood in which they lived. There was no association between playing  
351 sports in general, and soccer in particular, and having ALS.

352

353 Weiss and colleagues [71] conducted a study of 660 Swedish twins, older than 50 years of age at  
354 the time of baseline examination, who were being followed for 19 years with 3-year follow-up  
355 examinations with the Mini Mental State Examination (MMSE). Cognitive impairment was  
356 defined using a cutoff of 27, with lower scores indicative of more severe impairment. Exposure  
357 was based on a single survey question: 'Have you been involved in any sport (e.g., football, ice  
358 hockey, or boxing) that may involve a hit on a head?', and 78 (11.8%) of the cohort endorsed  
359 this question affirmatively. The authors reported that participation in contact or collision sports  
360 during youth was not significantly associated with measured cognitive impairment later in life  
361 [71].

362

## 363 Narrative Review of Studies of Former Professional Athletes

364

365 Eighteen studies involved former or current professional athletes [79-96]. There were nine  
366 studies with former NFL players [79, 80, 84, 85, 88, 91-94].

367

368 Mental health was one of the outcomes of interest in eight studies with former professional  
369 athletes [79-81, 85, 87, 91, 92, 94]. Two studies of former NFL players found an association  
370 between a greater number of past concussions and a greater risk for depression [85, 94]. In  
371 contrast, mortality studies, conducted by examining death certificates, revealed that former NFL  
372 players are at significantly *lower* risk for death relating to psychiatric disorders [79, 80], and  
373 hospitalization for psychiatric problems was *less* common in former professional soccer players  
374 [87]. All studies that examined suicide as a manner of death in former NFL players or former  
375 professional soccer players reported either significantly lower risk [79, 80, 92] or no difference  
376 compared to men in the general population [81, 87].

377

378 Neurological conditions (e.g., dementia) and neurodegenerative diseases (e.g., Alzheimer's  
379 disease and ALS) were outcomes in nine studies [79-84, 86, 90, 91, 93], and many of these  
380 studies reported worse outcomes for former professional athletes. Greater risk for neurological  
381 conditions and neurodegenerative diseases was reported for both former NFL players [93] and  
382 former professional soccer players [90]. Six studies reported on ALS as an outcome, and all six  
383 found an association with participation in professional sports [81-84, 90, 93]. However, most of  
384 these studies were ecological in nature with the exposure-outcome relationship at the group  
385 rather than the individual level. Thus, an association between variables at the group level might  
386 not be confirmed at the individual level. In addition, these associations are mostly unadjusted  
387 with little or no control of individual confounding factors. This makes them susceptible to  
388 "ecologic fallacy," a bias that occurs when associations at the group level are not confirmed at  
389 the individual level. Ecological studies [97] can raise hypotheses to be tested in more rigorous  
390 study designs but cannot address causation at the individual level. Study summaries are provided  
391 below.

392

393 Kerr and colleagues [94] followed a cohort of 1,044 former NFL players with surveys that asked  
394 about demographic information, number of concussions sustained during their professional  
395 football career, physical and mental health, and prevalence of diagnosed conditions. Between the  
396 2001 and 2010 surveys, 106 (10.2%) reported being diagnosed as clinically depressed. The  
397 authors reported that the 9-year risk of depression diagnosis increased in association with greater  
398 self-reported past concussions from 3% in those who reported zero past concussions to 26.8% in  
399 the group that reported 10 or more prior concussions. The authors reported that those former  
400 players who developed depression, compared to those who did not, were younger, they were  
401 retired for fewer years, and they had worse physical health scores when surveyed in 2001. The  
402 authors speculated that reduced physical functioning might be associated with a growing sense of  
403 hopelessness and less physical independence, contributing to an erosion of mental health.

404

405 Brett and colleagues [85] investigated 333 former NFL players at 3 time points over 19 years as  
406 part of the NFL-LONG study (i.e., 2001, 2010, and 2019). Their mean age at the first time point  
407 was 49 (SD=9.4 years). Players with a greater history of concussion were more likely to report  
408 greater depressive symptoms severity. Years of participation in sports was not associated with

409 symptoms of depression. The number of individuals who reported symptoms of depression that  
410 were greater than one SD above the general population mean increased from 6.7% in 2001 to  
411 16% in 2019. A decline in physical functioning, but not concussion history or years of football  
412 exposure, was an important predictor of worsening depression over time.  
413

414 Russell and colleagues conducted a large-scale study of former professional soccer (i.e.,  
415 European football) players from Scotland and examined psychiatric hospitalizations [87]. Over  
416 an 18-year observation period, 5.1% (388/7,676) of former professional soccer players compared  
417 to 6.1% (1,399/23,028) of matched population controls were hospitalized for psychiatric reasons.  
418 Regarding specific diagnoses, former professional soccer players had a lower risk of  
419 hospitalization for depression (HR=0.64; 95% CI=0.44-0.92), bipolar and affective mood  
420 disorders (HR=0.55; 95% CI=0.34-0.88), anxiety and stress related disorders (HR=0.37; 95%  
421 CI=0.25-0.55), alcohol use disorders (HR=0.62; 95% CI=0.51-0.76), and drug use disorders  
422 (HR=0.39; 95% CI=0.25-0.60) [87]. This study also examined suicide as a manner of death in  
423 former professional soccer players [87]. There was no significant difference in the rate of suicide  
424 or age of suicide between former professional soccer players and their matched population  
425 controls. Of the total sample, 0.25% (19/7,676) of former professional soccer players and 0.40%  
426 (93/23,028) of population controls had died as the result of suicide, and of those who had died  
427 during the observation period, 1.6% of former soccer players (19/1,180) had suicide as their  
428 manner of death compared to 2.4% of population controls (93/3,807) [87].  
429

430 Baron and colleagues [79] identified a sample of 3,439 former NFL players who played at least 5  
431 seasons in the NFL between 1959 and 1988 through a pension fund database, and reported that  
432 334 had died during the observation period of the study (up through 2007). The primary purpose  
433 of their study was to examine cardiovascular mortality. However, in Table 2 of that paper they  
434 reported that there was no significant increased risk for mortality associated with diseases of the  
435 nervous system and sense organs for former NFL players compared to men from the general  
436 population. There were 12 documented deaths from diseases of the nervous system and sense  
437 organs compared to 9.7 that would be expected from the general population (SMR=1.24; 95%  
438 CI, 0.64–2.16). They also reported on psychiatric disorders as a cause of death and suicide as a  
439 manner of death. They found a significantly lower risk for death relating to both psychiatric  
440 disorders (Standardized Mortality Ratio or SMR=0.34, 95% CI=0.09-0.87) and suicide  
441 (SMR=0.41, 95% CI=0.19-0.78) for former NFL players compared to men from the general  
442 population.  
443

444 Lehman and colleagues [92] examined suicide mortality in former NFL players who played at  
445 least 5 seasons in the NFL who were identified through a pension fund database—the same  
446 cohort of 3,439 former players studied by Baron and colleagues [79]. The observation period was  
447 extended, however, from 2007 to 2013, and 537 former players had died. The authors reported  
448 that former NFL players had a significantly reduced risk of mortality from suicide. There were  
449 12 documented deaths from suicide compared to 25.6 that would be expected in a comparable  
450 sex/race/age sector of the US population (SMR=0.47; 95% CI, 0.24–0.82).  
451

452 Lehman and colleagues [93] used the same sample as Baron and colleagues [79] and conducted  
453 more narrow and specific analyses relating to ICD codes for neurodegenerative diseases as an  
454 underlying or contributing cause of death. The more narrowed analysis thus yielded 10 former

455 players (compared to 12 in Baron et al.) who were identified as having one of these conditions as  
456 the underlying cause of death, which was significantly greater than predicted from the general  
457 population (SMR=2.83; 95% CI, 1.36-5.21). When considering both underlying and contributing  
458 causes of death, they also reported significantly greater mortality associated with dementia  
459 (SMR=3.86, 95% CI=1.55-7.95) and ALS (SMR=4.31, 95% CI=1.73-8.87), but not Parkinson's  
460 disease (SMR=1.69, 95% CI=0.35-4.94) in former NFL players. However, it is not possible to  
461 determine whether these ecological findings would hold up in an individual-level analysis that  
462 could control for potential confounding factors. As the authors noted, it is not possible to  
463 determine what caused the increased risks in this study.

464

465 Lincoln and colleagues [80] examined a cohort that included 9,778 former NFL players, with at  
466 least 1 year in the NFL, whose last season was between 1986 and 2012. Two percent (N=227) of  
467 the players were deceased during the observation period, and the former players had significantly  
468 lower risk for death than the general population (SMR=0.46, 95% CI=0.40-0.52), although those  
469 with high body mass indexes during their playing years were at increased risk for overall  
470 mortality and cardiovascular disease mortality. The former NFL players did not significantly  
471 differ in risk for diseases of the nervous system and sense organs as their cause of death when  
472 compared with the general population (SMR=0.65, 95% CI=0.21-1.53). The former players had  
473 significantly lower mortality risk for 'mental, psychoneurotic, and personality disorders'  
474 (SMR=0.23, 95% CI=0.03-0.82) and suicide (SMR=0.58, 0.35-0.90).

475

476 Nguyen and colleagues [91] used publicly available databases and extracted information on  
477 Major League Baseball (MLB) and NFL athletes who played a minimum of one season/game.  
478 They compared all-cause mortality between former MLB and former NFL athletes and found  
479 that NFL players exhibited greater all cause (HR=1.26; 95% CI, 1.10-1.44), cardiovascular  
480 (HR=2.40; 95% CI, 2.03-2.84), and neurodegenerative disease (HR=2.99; 95% CI, 1.64-5.45)  
481 mortality rates when compared to MLB players. Neurodegenerative diseases were defined by  
482 ICD-9/10 codes and included senile and presenile dementia with or without delusion, depression  
483 or delirium, Alzheimer's disease, Parkinson's disease, secondary parkinsonism, and ALS. Nearly  
484 all the former NFL players had cardiovascular disease listed on their death certificates (96.3%),  
485 compared to half of the former MLB players (52.2%). Neurodegenerative diseases were listed on  
486 7.5% of the death certificates of former NFL players compared to 3.7% of former MLB players.  
487 The authors noted that they were not able to examine possible cultural, educational,  
488 socioeconomic status, genetic, family history, lifestyle, or environmental risk factors that might  
489 have contributed to the differences.

490

491 Daneshvar and colleagues [84] examined the incidence of and mortality from ALS in current and  
492 former NFL players who debuted between 1960 and 2019 using a publicly available database  
493 (N=19,423). They identified 38 men who had received a diagnosis of ALS (0.2%) and 28 who  
494 had died during the observation period, which represents a significantly higher incidence of ALS  
495 diagnosis (standardized incidence ratio=3.59; 95% CI, 2.58-4.93) and mortality from ALS  
496 (SMR=3.94; 95% CI=2.62-5.69) among NFL players compared to men from the general  
497 population, after adjusting for age and race. The authors reported that 40% of those cases  
498 occurred in the 1960s and the general population control group was taken from 2009-2011. The  
499 authors noted that they were unable to identify specific factors that increased the risk of ALS like  
500 smoking and exposure to herbicides and pesticides, which may have been more common in the

501 1960s. They also reported that players with ALS had significantly longer careers than those who  
502 did not have ALS.

503

504 There were five studies that examined ALS in former professional Italian soccer players, and all  
505 reported that former players had greater mortality from ALS than men from the general  
506 population [81-83, 95, 96]. Taioli [81] identified a cohort of 5,389 Italian soccer players of  
507 whom 63 had died. There were four deaths from ALS, which was significantly greater than  
508 expected using the US general population as the reference standard SMR=18.18 (95% CI=5.00–  
509 46.55). There was no significant difference in the incidence of death from suicide in the soccer  
510 players compared to men from the US general population (SMR=0.81, 95% CI=0.35-1.59). Belli  
511 and Vanacore [82] examined causes of death in a cohort of about 24,000 Italian soccer players,  
512 of whom 350 had died, with eight having died from ALS and five from other diseases of the  
513 nervous system. The soccer players were significantly more likely to die from ALS than men  
514 from the Italian general population (Standardized Proportionate Mortality Ratio or SPMR=1,158,  
515 95% CI=672-1,998) but not from other diseases of the nervous system (SPMR=93, 95% CI=30-  
516 218). These analyses only controlled for age and calendar period by standardization. In this  
517 cohort, former soccer players were not more likely to have neurological diseases, separate from  
518 ALS, as a cause of death.

519

520 Pupillo et al. [83] examined ALS as a cause of death in a cohort of 23,586 Italian soccer players,  
521 and 34 cases of ALS were identified (0.14%). They reported that the mean age of diagnosis was  
522 45.0 years compared to 65.2 years in the general population. The incidence rate in soccer players  
523 was significantly greater than for men in the general population (Standardized Incidence Ratio or  
524 SIR=1.91, 95% CI=1.32–2.67) in the entire sample and more so in subjects under the age of 45  
525 (SIR=4.66, 95% CI=2.66–7.57). The authors speculated that ‘repeated traumatic events and  
526 heavy physical exercise may be all implicated, but the role of genetic predisposition cannot be  
527 likewise excluded’ (page 408) [83]. Only age, level of play, position of play and year starting  
528 soccer were controlled in the analysis, which was ecological or at the group rather than the  
529 individual level.

530

531 Chio and colleagues undertook an ecological analysis of a cohort of 7,325 male professional  
532 soccer players from Italy identifying five cases of ALS. The number of expected cases in was  
533 0.77, yielding a standardized morbidity ratio (SMR) of 6.5 (95% CI=2.1-15.1). Their mean age  
534 of onset was 43.4 years (SD=9.1, range=33-56). Those who played professionally more than five  
535 years had greater risk [95]. In a follow-up study of the same cohort [96], three additional cases  
536 were identified, for a total of eight cases. The number of expected cases was 1.24, yielding an  
537 SMR of 6.45 (95% CI=2.78-12.70). No cases of ALS were identified in control cohorts of  
538 professional basketball players (n=1,973) or road cyclists (n=1,701), but their numbers were  
539 smaller than the soccer players. The authors stated that more analyses of other athlete cohorts are  
540 needed to draw definitive conclusions about the risk of ALS.

541

542 Mackay and colleagues conducted a large-scale study of former professional soccer players from  
543 Scotland that examined neurodegenerative disease mortality [90]. ‘Neurodegenerative disease’  
544 was broadly defined based on ICD codes for several conditions. During the follow-up period,  
545 15.4% of the former soccer players (1,180/7676) and 16.5% of the matched general population  
546 controls (3,807/23,028) had died. Players were individually matched to general population

547 controls on age, sex, socioeconomic status, and competing risks of death from ischemic heart  
548 disease and lung cancer. Having any neurodegenerative disease listed as the primary or  
549 contributory cause of death occurred for 2.9% (222/7,676) former soccer players compared to  
550 1.0% (228/23,028) of matched controls (HR=3.53, 95% CI=2.72-4.57). Dementia 'not otherwise  
551 specified' was listed for 2.3% of former soccer players and 0.8% of matched controls (HR=3.87,  
552 95% CI=2.86-5.24). Alzheimer's disease was listed for 0.8% of former soccer players (64/7,676)  
553 and 0.2% (47/23,028) of matched controls (HR=5.07, 95% CI=2.92-8.82). Parkinson's disease  
554 was listed for 0.4% (28/7,676) of former soccer players compared to 0.2% (44/23,028) of  
555 matched controls (HR=2.15, 95% CI=1.17-3.96). Motor neuron disease was listed for 0.3%  
556 (22/7,676) of former soccer players and 0.1% (17/23,028) of matched controls (HR=4.33, 95%  
557 CI=2.05-9.15) [90]. Russell and colleagues [86], using the same population cohorts as Mackay  
558 and colleagues, reported that the former professional soccer players were more likely to have  
559 neurological diseases than people in the general population, with the risk being highest for  
560 former defenders and lowest for former goaltenders. Regarding career length, risk was highest  
561 among former soccer players with professional career lengths longer than 15 years (HR=5.20;  
562 95% CI, 3.17-8.51).



## 563 Methodological Considerations and Limitations with the Studies 564 Included in this Review

565

566 The literature on risk studies relating to possible long-term effects of concussions and repetitive  
567 head impacts experienced during participation in youth, amateur, and professional sports is  
568 limited but evolving. We adopted a low threshold for admissibility. Some of the studies had  
569 some control for confounding variables [72, 73, 85-87, 90], with one study controlling for many  
570 confounding variables [68]. There was only one study that was rated as having low-medium risk  
571 of bias [68]. All other studies were rated as having high risk of bias, primarily because a lack of  
572 control for confounding or being an ecologic study with the analysis at the group rather than the  
573 individual level. It is important to appreciate that the studies we reviewed did not consider many  
574 genetic, lifestyle, or medical factors that could potentially confound associations between later in  
575 life adverse health outcomes and earlier in life participation in sports, and some did not consider  
576 any confounding factors beyond age or sex. The studies involving amateur athletes yielded,  
577 almost entirely, negative results. Negative results in cohort studies are important in this regard  
578 because cohort studies provide the most rigorous study design available in this literature, but  
579 also, of course, must be interpreted within the context of a variety of methodological limitations  
580 that are common in this literature.

581

582 Another methodological consideration is whether the ‘general population’ is a reasonable  
583 comparison group for studies involving the brain health of former contact and collision sport  
584 athletes. It is unlikely that control subjects from the general population are similar in all risk  
585 factors as professional athletes. Comparing to the general population might under or over-  
586 estimate certain risks. For example, former athletes are more likely to experience the health  
587 benefits from a life of physical exercise. However, they may also experience more chronic pain  
588 and be prescribed more medications than controls from the general population. Finding the  
589 perfect control group is a challenge and any differences need to be accounted for in the study  
590 analyses.

591

592 The number of prior concussions, while playing sports or over the course of life, was estimated  
593 in only four [76, 85, 89, 94] of the 28 studies included in this review. For two of those studies,  
594 the number of prior injuries were determined based on a self-report survey [85, 94]. There was  
595 no information relating to the severity of the injuries or the duration of symptoms following the  
596 injuries. Differential recall bias is a systematic error that can occur when subjects are asked to  
597 recall health exposures that are linked to poor outcomes. Some of the reviewed studies asked  
598 subjects to recall their lifetime exposure to head injuries in sport. Former athletes might over-  
599 estimate the number of past concussions depending on their current health state. One study  
600 illustrated that concussion reporting in former NFL players, over time, can be influenced by  
601 recall bias [98], and approximately one in three former players reported a greater concussion  
602 history in 2010 compared to their responses in 2001. Those who reported this greater number,  
603 compared to those who reported the same between 2001 and 2010, endorsed worse physical  
604 functioning and worse mental health—thus illustrating that recall bias can occur when former  
605 athletes with ongoing problems are asked to remember potential causes of their current problems  
606 that occurred in their past (such as past concussions). In contrast, unexposed subjects are usually  
607 more healthy than the exposed subjects in a study, and they will often recall fewer health  
608 exposures.

609

610 One study in this review attempted to document the amount of repetitive head impact exposure  
611 experienced by the subjects, and then associate that with all-cause mortality in former NFL  
612 players, which was done based on playing position and years of participation [88]. This study  
613 was deemed high risk of bias because it did not control for any factors that could confound this  
614 association. For example, former linemen were identified as having the greatest repetitive head  
615 impact exposure, but there was no control for their known increased risk for cardiovascular  
616 disease in the analyses.

617

618 Most studies defined ‘exposure’ simply as the presence or absence of participation in certain  
619 sports. This could mean, for example, merely whether or not the person participated in American  
620 high school football [68-70, 72-75], professional football [79, 80, 88, 91-93], or professional  
621 soccer [81-83, 86, 87, 90, 95, 96]. Most of these studies did not attempt to quantify exposure,  
622 such as the total number of years of participation or playing time. Some studies of former  
623 professional players, however, included analyses relating to years of exposure [84, 85, 95, 96].

624

625 Some studies relied on surveys and questionnaires completed by former athletes [68-70, 72, 73]  
626 [85, 94]. Both sampling bias and attrition bias limit how well the results from those study  
627 samples can be generalized to the larger population of former athletes from which they were  
628 derived. There are also limitations, of course, relating to the accuracy of self-report and/or proxy  
629 report of past health exposures.

630

631 Several studies included in this review relied on data contained in death certificates. Some of  
632 these studies have relatively small sample sizes (e.g., fewer than 500 deaths) [79, 80, 93]. In  
633 these ecological studies, there is no explicit exposure other than belonging to a group—the  
634 exposure is playing a professional sport, such as football. Thus, there is no control of  
635 confounding at the individual level. These are, by definition, hypothesis generating studies, not  
636 studies that can be used to draw specific causal conclusions. Moreover, errors on death  
637 certificates are common, and include the coding of causes of death, comorbidities, and manner of  
638 death [99, 100]. Additionally, there is evidence that dementia as a cause of death is under-  
639 reported on death certificates [101].

640

## 641 Chronic Traumatic Encephalopathy (CTE) Narrative Review

642

643 There have been some case series and cross-sectional studies relating to postmortem  
644 neuropathological changes in former contact, collision, and combat sport athletes in the past 17  
645 years [22, 41-47], and many reviews of the literature relating to CTE have been published in the  
646 past few years [4, 14, 16-23, 25-28, 48-63]. The postmortem studies of CTE were not included in  
647 this systematic review because they did not meet the *a priori* inclusion criteria for research  
648 design. However, given considerable interest in this topic, a review of the neuropathology  
649 studies, a summary of gaps in knowledge, and directions for future research is provided below.

650

### 651 **Historical Background**

652 In 1928, Martland described the ‘punch drunk’ syndrome in boxers as the first clinical  
653 description of chronic neurological deficits that were increasingly apparent to lay observers.  
654 Martland suggested that the neurological and neurocognitive signs were variably progressive,  
655 and in some cases necessitated commitment to an asylum [102]. Millspaugh used the term  
656 ‘dementia pugilistica’ in 1937 [103]. Bowman and Blau used the term ‘traumatic encephalopathy  
657 of pugilists’ (or punch drunk) in a book chapter that provided a rich description of diverse  
658 clinical problems experienced by boxers [104], and then they discussed a single case study of a  
659 28-year-old professional boxer with severe neuropsychiatric problems and diagnosed him with  
660 ‘chronic traumatic encephalopathy of pugilists’ (p. 345). In 1949 and 1957, Critchley used the  
661 term CTE to describe his experience with boxers who had chronic neurological conditions [105,  
662 106].

663

664 Diverse gross and microscopic postmortem neuropathology was described by Corsellis and  
665 colleagues in 1973 in a sample of 15 boxers [107]. The authors emphasized damage to the  
666 septum pellucidum, substantia nigra degeneration, cerebellar tonsillar sclerosis, and  
667 neurofibrillary tangles as a relatively stereotyped pattern of structural change in the brain with  
668 prolonged boxing exposure. A recent re-examination of the Corsellis series by Goldfinger et al.  
669 [108] revealed CTE-NC by modern criteria in 7 of 14 cases. Several cases were diagnosed as  
670 having other conditions (e.g., Lewy body dementia, progressive supranuclear palsy, Alzheimer’s  
671 disease). In 2005, Omalu and colleagues described postmortem neuropathology in a former  
672 American professional football player [109]. The following year, the same research group  
673 published a second case [110], depicting some neocortical p-tau as well as tau in the locus  
674 ceruleus.

675

676 In 2009, McKee reviewed 48 cases in the literature that had descriptions of postmortem  
677 neuropathology and added three more cases in a former professional football player and two  
678 former professional boxers [46]. They described gross neuropathology such as atrophy of the  
679 cerebral hemispheres, medial temporal lobe, thalamus, mamillary bodies, and brainstem with  
680 ventricle enlargement and fenestrated septum pellucidum, and microscopic neuropathology such  
681 as extensive tau-immunoreactive neurofibrillary tangles, astrocytic tangles, and spindle-shaped  
682 neurites. In 2011, Omalu and colleagues discussed what they described as ‘emerging  
683 histomorphologic phenotypes’ in their case series of 14 former professional and 3 high school  
684 athletes [45]. In 2013, McKee and colleagues published a large postmortem case series of  
685 neuropathology in former contact and collision sport athletes [44]. In that paper, the definition of  
686 the pathology was refined, a 1-4 staging system for neuropathological severity was proposed,

687 and it was noted that CTE-NC often co-existed with the pathology of several neurodegenerative  
688 diseases, such as Alzheimer's disease.

689

690 In 2015, Bieniek and colleagues [111] conducted a study using an initial sample of 1,721 men  
691 from the Mayo Clinic neurodegenerative disorders brain bank, identified 66 who were former  
692 athletes, and reported that 31.8% had CTE-NC (i.e., 21/66), based on the 2013 definition. They  
693 also studied the brains of 198 age and diseased matched men and women with no known contact  
694 sport exposure. There were no cases with a history of a single TBI or who did not participate in  
695 contact sports who were identified as having CTE-NC. Athletic participation included a wide  
696 variety of sports with differing head impact exposures. The authors did not assess possible  
697 clinical correlates of CTE-NC. There was also a wide variety of underlying neurodegenerative  
698 diseases among the case material.

699

#### 700 **Consensus Criteria for the Neuropathology of CTE**

701 Preliminary criteria for defining the microscopic neuropathology and establishing the research  
702 methodology for case identification were established through a consensus effort convened by the  
703 National Institute of Neurological Disorders and Stroke (NINDS) and National Institute of  
704 Biomedical Imaging and Bioengineering and published in 2016 [29]. The panel defined a  
705 *pathognomonic* lesion based on light microscopic assessment of p-tau immunohistochemical  
706 stains as follows: 'p-tau aggregates in neurons, astrocytes, and cell processes around small  
707 vessels in an irregular pattern at the depths of the cortical sulci' (page 81). The authors described  
708 this as a first step toward the development of validated criteria for CTE-NC and stated that future  
709 research would address the (i) validation of the criteria among a broader group of  
710 neuropathologists using cases submitted from multiple sources, (ii) identification of CTE-NC  
711 when neurodegenerative diseases, such as Alzheimer's disease are present, and (iii) potential  
712 contribution of p-tau and other pathologies to clinical signs or symptoms.

713

714 In 2017, Mez and colleagues published a large case series of brain donations and reported that  
715 essentially all former professional American football players in their sample had postmortem  
716 neuropathology consistent with CTE-NC [42]. Moreover, 91% of former college players and  
717 21% of former high school players in this donation program had evidence of CTE-NC [42]. In  
718 2020, Bieniek and colleagues published a large case series of postmortem findings former  
719 amateur athletes (classified using high school yearbook and obituaries as source data), compared  
720 to those who did not participate in sports, and identified CTE-NC in 2.8% of the total sample  
721 (21/750), 5.0% (15/300) of those who played sports, 1.3% who did not play sports (6/450), 0%  
722 of women (of 273), 4.4% (21/477) of men, 7.9% of men who played football (11/140), and 2.4%  
723 (6/245) of men who did not play sports. Those men who had CTE-NC were, on average, 10 years  
724 older at the time of death than those who were negative for CTE-NC, and they were much more  
725 likely to have Alzheimer's disease neuropathologic change (i.e., 47.6% vs. 20.2%). The authors  
726 concluded that participation in football, specifically beyond the high school level, was associated  
727 with greater odds of having CTE-NC. The aforementioned studies cannot provide an accurate  
728 estimate of risk for, or prevalence of, CTE-NC—but they are important for illustrating presence  
729 of the pathology in these groups.

730

731 Recently published large postmortem studies from the Sydney Brain Bank in Australia (N=636)  
732 [112] and a community sample in the United States (N=532) [113] have revealed very few cases

733 of CTE-NC (less than 1%), and a large European study (N=310) reported no cases of CTE-NC  
734 [114], using ‘strict’ criteria. In a study of 180 consecutive autopsies in Australia, four cases of  
735 mild CTE-NC were identified (2.2%) [115]. In a recent study of 225 former military personnel,  
736 CTE-NC was identified in 4.4%, and it usually involved minimal microscopic changes on p-tau  
737 immunohistochemistry—with half of the identified cases having only a single pathognomonic  
738 lesion—and the authors concluding that it is unclear whether the minimal histopathological  
739 findings were of clinical significance [116].

740

741 In 2021, updated and revised consensus criteria for CTE-NC were published [30]. The criteria  
742 were narrowed such that astrocytic tau was not required. Strict features to better differentiate  
743 CTE-NC from age-related neuropathology, specifically aging-related tau astrogliopathy  
744 (ARTAG) [117] and primary age-related tauopathy (PART) [118] were proposed. The updated  
745 *pathognomonic lesion* for CTE-NC was described as ‘p-tau aggregates in neurons, with or  
746 without thorn-shaped astrocytes, at the depth of a sulcus around a small blood vessel, deep in the  
747 parenchyma, and not restricted to the subpial or superficial region of the sulcus’ (page 217).  
748 Based on their discussions, the panel proposed a minimum threshold for the diagnosis of CTE (a  
749 single microscopic lesion), and an algorithm for judging CTE severity as ‘high’ or ‘low,’ based  
750 on the presence of a CTE lesion, and the additional presence of one or more neurofibrillary  
751 tangles in various brain regions, including the hippocampus, amygdala, entorhinal cortex,  
752 thalamus, mamillary bodies, cerebellar dentate nucleus, neocortical layer II not otherwise  
753 specified, and cortical areas in the vicinity of the CTE lesion(s). The authors further stated that  
754 differentiating CTE-NC from other neurodegenerative pathologies (e.g., Alzheimer’s disease  
755 neuropathologic change) and other age-related pathologies (e.g., ARTAG and PART) represents  
756 a topic of interest for future studies. The authors did not make assertions about CTE-NC in the  
757 presence of canonical neurodegenerative diseases, such as Alzheimer’s disease.

758

759 The authors of the 2021 consensus criteria for CTE-NC emphasized the importance of future  
760 research to validate a newly proposed working protocol for CTE-NC and to improve the ability  
761 to identify CTE-NC when canonical neurodegenerative diseases, such as Alzheimer’s disease, or  
762 aging-related pathologies, such as PART and ARTAG, are present [30]. The consensus group  
763 from 2016 [29] and 2021 [30] focused exclusively on criteria for defining CTE-NC; their work  
764 did not attempt to define a clinical syndrome or to determine whether there was an association  
765 between the neuropathology and specific clinical symptoms or neurological problems during a  
766 person’s lifetime.

767

768 A recent narrative review paper [63] examined the issue of association versus causation relating  
769 to repetitive head impacts and CTE-NC, which was explored through the lens of the nine  
770 viewpoints proposed by Sir Austin Bradford Hill in 1965 [119]. The authors of that review  
771 concluded that the evidence supporting repetitive head impacts causing CTE-NC was compelling  
772 [63].<sup>1</sup>

773

---

<sup>1</sup> As part of that review, the authors identified six studies that they referred to as case-control studies and calculated odds ratios for an association between sports exposure and CTE-NC. In the present systematic review, we did not consider those six studies to be case-control or cohort studies that were designed to examine risk for CTE-NC or risk for later in life clinical conditions or disorders. In addition, the original authors of most of the studies did not conceptualize them as case-control studies designed to measure risk.

774 **Updated Website by the NINDS about CTE**

775 The NINDS has supported multi-year research programs designed to (i) develop and evaluate  
776 expert consensus-based criteria for defining CTE-NC; (ii) create a methodology for case  
777 identification; and (iii) develop the first consensus criteria for defining a clinical condition,  
778 traumatic encephalopathy syndrome, that might be caused, at least in part, or be associated with,  
779 varying degrees of CTE-NC (as well as other types of neuropathology associated with aging and  
780 diseases). The web page of the NINDS that described these funded research programs was  
781 changed, in the days prior to the 2022 Concussion in Sport Group Consensus Meeting,  
782 presumably in response to advocacy efforts, to include a statement about causation. The web  
783 page now reads that CTE-NC *'is caused in part by repeated traumatic brain injuries'*  
784 [[https://www.ninds.nih.gov/current-research/focus-disorders/focus-traumatic-brain-injury-](https://www.ninds.nih.gov/current-research/focus-disorders/focus-traumatic-brain-injury-research)  
785 [research](https://www.ninds.nih.gov/current-research/focus-disorders/focus-traumatic-brain-injury-research) (last accessed November 6, 2022)]. The NINDS neither described the process  
786 undertaken, nor the underlying evidence relied upon, for making the wording change in the  
787 website article from *'is associated with'* to *'is caused in part by...'* nor for the word choice of  
788 *'repeated traumatic brain injuries'* versus *'head impacts'* or some other term implying blows to  
789 the head that do not exceed the conventional threshold for defining traumatic brain injury. Our  
790 systematic review did not address these mechanisms of injury, differences in terminology, or  
791 either odds ratios or relative risks for CTE-NC.

792

793 **Criteria for the Clinical Diagnosis of Traumatic Encephalopathy Syndrome**

794 In 2014, preliminary research criteria for the clinical diagnosis of traumatic encephalopathy  
795 syndrome were published [120]. Those criteria were broad, and the core features included  
796 depression (e.g., major depressive disorder), anger dyscontrol (e.g., intermittent explosive  
797 disorder), and cognitive impairment (e.g., mild cognitive impairment or dementia). Some studies  
798 illustrated that the proposed psychiatric features overlapped with primary psychiatric disorders  
799 and with mental health symptoms and problems in the general population, raising concerns about  
800 misdiagnosis [121-124]. A clinicopathological study in 2021 attempted to validate the 2014  
801 criteria and found that they were highly sensitive to the presence of CTE-NC, but they had very  
802 low specificity [125]. In other words, the diagnostic criteria could not rule out traumatic  
803 encephalopathy syndrome or distinguish it from other disorders.

804

805 The first consensus criteria for traumatic encephalopathy syndrome, sponsored by the NINDS,  
806 were published in 2021, and no parts of the preliminary 2014 criteria were retained in their  
807 original form [126]. The consensus group made major changes by eliminating major depressive  
808 disorder and intermittent explosive disorder as core diagnostic features. They emphasized that  
809 the diagnosis required primarily progressive cognitive impairment, with or without  
810 neurobehavioral dysregulation.

811

812 **Directions for Future Research in CTE-NC and Traumatic Encephalopathy Syndrome**

813 There are important gaps in knowledge that provide directions for future research. At present, the  
814 incidence and prevalence of CTE-NC, or traumatic encephalopathy syndrome, in former athletes,  
815 military veterans, and people from the general population is not known. Moreover, it is not  
816 known whether small amounts of CTE-NC cause specific neurological or psychiatric problems,  
817 the extent to which larger amounts of CTE-NC can be distinguished from aging and AD, or  
818 whether the neuropathology is inexorably progressive.

819

820 The NINDS consensus group made numerous important recommendations to address gaps in  
821 knowledge relating to CTE-NC and traumatic encephalopathy syndrome [126]. They encouraged  
822 researchers to address topics such as determining whether patchy areas of perivascular p-tau  
823 deposition at the depths of cerebral sulci and more limited amounts of CTE-NC have direct  
824 clinical correlates, and whether more abundant CTE-NC is associated with specific cognitive and  
825 neuropsychiatric symptoms. They also encouraged studies relating to the interrater reliability and  
826 predictive validity of the new criteria for traumatic encephalopathy syndrome. They emphasized  
827 that the new diagnostic criteria are designed for research use, and it is possible that a number of  
828 factors unrelated to sporting history might be associated with the clinical features underlying this  
829 new diagnosis, including ‘medical and psychosocial variables, such as sleep disorders, vascular  
830 risk factors, chronic pain, and racial and associated inequities in social determinants of health’  
831 (page 859) [126]. It is recognized that more research is needed to examine a wide range of  
832 neuropathology, such as axonopathy, vascular changes including blood brain barrier disruption,  
833 and inflammation—to determine the extent to which polypathologies might contribute to clinical  
834 signs and symptoms.  
835

## 836 Historical Synopsis of Chronic Traumatic Encephalopathy

837

|           |                                                                                                                                                                                                                                                                                                                                                                                      |
|-----------|--------------------------------------------------------------------------------------------------------------------------------------------------------------------------------------------------------------------------------------------------------------------------------------------------------------------------------------------------------------------------------------|
| 1928      | Martland [102] described the ‘punch drunk’ syndrome in boxers (the first clinical description of chronic neurological deficits).                                                                                                                                                                                                                                                     |
| 1937      | Millspaugh [103] used the term ‘dementia pugilistica.’                                                                                                                                                                                                                                                                                                                               |
|           | Bowman and Blau [104] used the term ‘traumatic encephalopathy of pugilists’ and ‘chronic traumatic encephalopathy of pugilists.’                                                                                                                                                                                                                                                     |
| 1949      | Critchley used the term CTE to describe his experience with boxers who had chronic neurological conditions [106].                                                                                                                                                                                                                                                                    |
| 1969      | Seminal book on chronic traumatic brain injury (traumatic encephalopathy syndrome) in former boxers (by Roberts). He clinically examined 224 former boxers and identified 17% as having the syndrome (i.e., 11% with a mild form of the syndrome and 6% with a severe form of TES) [127].                                                                                            |
| 1973      | Diverse gross and microscopic postmortem neuropathology were described in a sample of 15 boxers (Corsellis and colleagues). The authors emphasized damage to the septum pellucidum, substantia nigra degeneration, cerebellar tonsillar sclerosis, and neurofibrillary tangles as a relatively stereotyped pattern of structural change in the brain with prolonged boxing exposure. |
| 1991      | P-tau in depths of cortical sulci was identified in a person with autism who had a long history of head banging behavior (Hof and colleagues) [128].                                                                                                                                                                                                                                 |
| 1999      | Tau pathology associated with repetitive head injuries might relate to damage to blood vessels or perivascular elements (Geddes et al.) [129]                                                                                                                                                                                                                                        |
| 2000      | Jordan reviewed the literature on <i>chronic traumatic brain injury</i> in former boxers and stated that it is not clear whether their clinical deterioration resulted from a progressive neurodegenerative disease, the aging process superimposed on a fixed neurological injury, or both [130].                                                                                   |
| 2005-2006 | Omalu and colleagues described postmortem neuropathology in two former American professional football players [109, 110].                                                                                                                                                                                                                                                            |
| 2009      | McKee and colleagues published a seminal review of the world literature on CTE with a focus on cases studies that had descriptions of postmortem neuropathology [44].                                                                                                                                                                                                                |
| 2011      | Omalu and colleagues described ‘emerging histomorphologic phenotypes’ in their case series of 14 former professional and 3 high school athletes [45].                                                                                                                                                                                                                                |
| 2013      | McKee and colleagues published a large postmortem case series of neuropathology and clinical features. The definition of the pathology was refined, a 1-4 staging system for neuropathological severity was proposed.                                                                                                                                                                |
| 2013      | Hazrati and colleagues described the postmortem neuropathology from six former professional Canadian football players and noted that three had CTE-NC and the other three had other neuropathological diagnoses [47].                                                                                                                                                                |



|           |                                                                                                                                                                                                                                                                                                                                                                                                                                                                                                                                      |
|-----------|--------------------------------------------------------------------------------------------------------------------------------------------------------------------------------------------------------------------------------------------------------------------------------------------------------------------------------------------------------------------------------------------------------------------------------------------------------------------------------------------------------------------------------------|
| 2014      | Preliminary research criteria for the clinical diagnosis of traumatic encephalopathy syndrome were published (Montenigro et al.) [120].                                                                                                                                                                                                                                                                                                                                                                                              |
| 2015      | Bieniek and colleagues [111] conducted a study using a neurodegenerative disorders brain bank, identified 66 men who were former athletes, and reported that 31.8% had CTE-NC.                                                                                                                                                                                                                                                                                                                                                       |
| 2016*     | Preliminary research criteria for defining the microscopic neuropathology and establishing the research methodology for case identification were established through a consensus effort and published by McKee and colleagues [29]. The panel defined a <i>pathognomonic</i> lesion based on light microscopic assessment of p-tau immunohistochemical stains as follows: ‘p-tau aggregates in neurons, astrocytes, and cell processes around small vessels in an irregular pattern at the depths of the cortical sulci’ (page 81).  |
| 2016-2017 | CTE-NC was examined in case series and brain bank studies of people with schizophrenia (who had undergone leukotomy) [131], temporal lobe epilepsy [132], ALS [133], multiple system atrophy [134], and several other neurodegenerative diseases [135]. A large Canadian study of people under the age of 60 identified CTE-NC in 4.5% of their cases (but also noted that there is no lower bound for classifying CTE-NC, and an additional 30.6% of their sample had some degree of mild CTE-NC-like pathology; Noy et al.) [136]. |
| 2017      | Mez and colleagues published a large brain donation study and reported that essentially all former professional American football players (99%) in their sample had postmortem neuropathology consistent with CTE-NC [42].                                                                                                                                                                                                                                                                                                           |
| 2018      | A re-examination of the Corsellis series from the 1970s by Goldfinger et al. [108] revealed CTE-NC in 7 of 14 cases.                                                                                                                                                                                                                                                                                                                                                                                                                 |
| 2019      | Forrest and colleagues published a large postmortem European study (N=310) and reported no cases of CTE-NC [114], using ‘strict’ criteria.                                                                                                                                                                                                                                                                                                                                                                                           |
| 2019      | Lee and colleagues examined the brains of former athletes with dementia in combination with their clinical histories to derive an integrated clinicopathological diagnosis for each person [41]. They identified CTE-NC in 5 of the 7 former soccer players and 3 of the 4 former rugby players.                                                                                                                                                                                                                                     |
| 2020      | Bieniek and colleagues published a large-scale postmortem study of former amateur athletes (classified using high school yearbook and obituaries as source data), compared to those who did not participate in sports, and identified CTE-NC in 2.8% of the total sample (21/750), 5.0% (15/300) of those who played sports, 1.3% who did not play sports (6/450), 0% of women (of 273), 4.4% (21/477) of men, 7.9% of men who played football (11/140), and 2.4% (6/245) of men who did not play sports.                            |
| 2020      | Researchers reported that the distribution of astroglial pathology in the depths of cortical sulci, alone, and not neuronal pathology, might be more reflective of CTE-NC [137].                                                                                                                                                                                                                                                                                                                                                     |
| 2020-2021 | Some studies illustrated that the proposed psychiatric features of 2014 criteria for TES overlapped with primary psychiatric disorders and with mental health symptoms                                                                                                                                                                                                                                                                                                                                                               |

|       |                                                                                                                                                                                                                                                                                                                                                                                                                                       |
|-------|---------------------------------------------------------------------------------------------------------------------------------------------------------------------------------------------------------------------------------------------------------------------------------------------------------------------------------------------------------------------------------------------------------------------------------------|
|       | and problems in the general population, raising concerns about misdiagnosis [121-124].                                                                                                                                                                                                                                                                                                                                                |
| 2021  | A clinicopathological study attempted to validate the 2014 criteria and found that they were highly sensitive to the presence of CTE-NC, but they had very low specificity [125].                                                                                                                                                                                                                                                     |
| 2021  | Schwab and colleagues published a postmortem study of 35 former football and hockey players and reported that 17 (48.6%) had CTE-NC [43].                                                                                                                                                                                                                                                                                             |
| 2021  | Postupna and colleagues published large postmortem study using a community sample in the United States (N=532) [113] and identified CTE-NC in fewer than 1%.                                                                                                                                                                                                                                                                          |
| 2021* | Updated and revised consensus criteria for CTE-NC were published [30]. The criteria were narrowed such that astrocytic tau was not required. Strict features to better differentiate CTE-NC from age-related neuropathology, specifically aging-related tau astroglipathy (ARTAG) [117] and primary age-related tauopathy (PART) [118] were proposed.                                                                                 |
| 2021* | The first consensus criteria for traumatic encephalopathy syndrome, sponsored by the NINDS, were published, and no parts of the preliminary 2014 criteria were retained in their original form [126]. They emphasized that the diagnosis required primarily progressive cognitive impairment, with or without neurobehavioral dysregulation.                                                                                          |
| 2022  | In a large postmortem study using the Sydney Brain Bank in Australia (N=636) [112], very few cases of CTE-NC were identified (fewer than 1%). In a study of 180 consecutive autopsies in Australia, four cases of mild CTE-NC were identified (2.2%) [115]. In a study of 225 former military personnel, CTE-NC was identified in 4.4% [116].                                                                                         |
| 2022  | One study reported that CTE-NC is more likely to be accurately identified when both neuronal and astroglial tau pathologies can be visualized [138]. Nonetheless, subpial ARTAG is no longer considered to be part of the 2021 consensus research definition of CTE-NC [30] and astrocytic p-tau in general is not required. A recent study emphasized that neuronal tau is more common than astrocytic tau in cases of CTE-NC [139]. |

838 Note: See the online supplementary material for a more complete review this literature. \*Consensus criteria  
839 published for neuropathological diagnosis and clinical diagnosis. ALS=amyotrophic lateral sclerosis; CTE=chronic  
840 traumatic encephalopathy, CTE-NC= chronic traumatic encephalopathy neuropathologic change, and  
841 NINDS=National Institute of Neurological Disorders and Stroke.  
842

## 843 Appendix A. Search Strategy

844

845 A draft search was initially developed in Medline, focusing on three main concepts: concussion  
846 or repetitive head impact, sports, and residual/long term effects. Search terms for ‘concussion’  
847 and ‘sports’ were developed for all systematic reviews written to inform the 6<sup>th</sup> International  
848 Consensus Conference on Concussion in Sport and are described separately in a methodology  
849 paper. For this paper specifically, additional search terms for repetitive head impacts were  
850 included to capture additional literature regarding exposure to repetitive head impacts and/or  
851 contact sport (see the online supplement). The third concept was extensive and comprehensive,  
852 including terms relevant to cognitive function/dysfunction, mental and substance abuse  
853 disorders, as well as neurological and neurodegenerative diseases, to capture a broad range of  
854 possible long-term effects. The author group developed and reviewed the initial search terms for  
855 repetitive head impacts and potential residual or long-term effects, inclusion and exclusion  
856 criteria, and database selection. Authors also submitted seed articles for the librarian (KAH) to  
857 use to verify that the search identified key articles in the field.

858

859 The search was informed by three main resources: search terms suggested by authors, keywords  
860 and subject headings informed by analysis of a set of known seed papers, as well as the  
861 systematic review on a similar topic conducted as part of the 5<sup>th</sup> Consensus Statement on  
862 Concussion in Sport. The search attempts to be comprehensive (i.e. a sensitive search) and is  
863 aimed at retrieving all potentially relevant articles. These supplemental materials include an  
864 annotated Ovid Medline search strategy in order to provide a search narrative and the complete  
865 search strategies for the other databases searched which includes: Embase (Ovid), Cochrane  
866 Central Register of Controlled Trials (Ovid), Cochrane Database of Systematic Reviews (Ovid),  
867 CINAHL Plus with Full Text (EBSCO), SPORTDiscus with Full Text (EBSCO), Scopus  
868 (Elsevier) and Web of Science Core Collection (including: Science Citation Index-Expanded,  
869 Social Sciences Citation Index, Arts & Humanities Citation, Conference Proceedings Citation  
870 Index - Science, Conference Proceedings Citation Index - Social Sciences & Humanities, and  
871 Emerging Sources Citation Index).

872

873 The search was created by K. Alix Hayden, MLIS MSc PhD (Librarian).

874

### 875 Study Selection

876

877 A rapid screen was completed by one author (GMS) to remove citations that were clearly  
878 irrelevant to the review (i.e., non-human research, opinion papers, conference proceedings, etc.).  
879 The title and abstract screenings were then completed by pairs of two authors independently  
880 (RJC, JDC, KJS, GMS). Conflicts were settled by a third author. Full texts were obtained and  
881 uploaded to Covidence. Prior to initiating the full text screen, authors were asked to review the  
882 citations captured for the full text screen to identify any additional citations they felt may meet  
883 inclusion criteria. Authors also were encouraged to identify additional possible articles at any  
884 stage of the review process, including while reviewing the full text articles. Any additional  
885 citations were added to the full text screen. Combinations of two authors independently reviewed  
886 the articles for the full text screen (RJC, JDC, GMS). Any disagreements resulted in engagement  
887 of a third author who also completed the full text screen and a meeting between the three authors  
888 was held to come to a final decision.

889

890 **1. Annotated Medline (via Ovid) Search Strategy as searched March 25, 2022**

891

892 The sports and concussion concepts were collaboratively created by K. Alix Hayden and Zahra  
 893 Premji (librarians), and peer reviewed using PRESS by Heather Ganshorn (librarian). The long-  
 894 term/residual effects concept was created by K. Alix Hayden, and peer reviewed using PRESS  
 895 by Zahra Premji.

896

897 Overview of Ovid Medline syntax:

|                          |                                                                                                                                                                                                                                      |
|--------------------------|--------------------------------------------------------------------------------------------------------------------------------------------------------------------------------------------------------------------------------------|
| .tw,kf.                  | Keyword searching. Searches the following fields: title, abstract, and author-supplied keywords                                                                                                                                      |
| Exp                      | Exploded subject heading. Includes more specific (i.e. narrower) subject headings which are nested below the main subject heading                                                                                                    |
| / (at the end of a term) | Subject heading                                                                                                                                                                                                                      |
| *                        | Truncation operator<br>Retrieves multiple endings for a word.<br>E.g. sport* retrieves: <i>sport, sports, sporting</i>                                                                                                               |
| Adj                      | Adjacency operator<br>Adj2 means that the two words/phrases will occur within 2 words of each other, in either direction.<br>E.g. return* adj2 play* retrieves return/returned/returning within 2 words in either direction of play* |
| OR                       | Boolean operator<br>Used to combine synonyms for the same concept                                                                                                                                                                    |
| AND                      | Boolean operator<br>Used to combine all the relevant concepts:<br><i>Concussion AND sports AND Long Term Effects</i>                                                                                                                 |

898

899 Database(s): **Ovid MEDLINE(R) and Epub Ahead of Print, In-Process & Other Non-Indexed**  
 900 **Citations and Daily**  
 901

| Concepts   | #  | Searches                                                                                                         | Results | Annotations                                                                                  |
|------------|----|------------------------------------------------------------------------------------------------------------------|---------|----------------------------------------------------------------------------------------------|
| Concussion | 1  | exp Brain Concussion/                                                                                            | 10987   | Exploded subject heading for concussion (standard concussion search)                         |
|            | 2  | Post-Concussion Syndrome/                                                                                        | 1423    | Exploded subject heading for post-concussive syndrome (standard concussion search)           |
|            | 3  | Craniocerebral Trauma/                                                                                           | 23057   | Additional subject headings of relevance (standard concussion search)                        |
|            | 4  | Brain Injuries/ or Brain Injuries, Traumatic/                                                                    | 63970   |                                                                                              |
|            | 5  | Brain Injury, Chronic/                                                                                           | 778     | CTE relevant subject headings to capture those articles that do not concussion-related terms |
|            | 6  | exp Chronic Traumatic Encephalopathy/                                                                            | 317     |                                                                                              |
|            | 7  | Neurodegenerative Diseases/                                                                                      | 22062   |                                                                                              |
|            | 8  | (concussion* or concussed or concussive or subconcuss* or sub-concuss*).tw,kf.                                   | 11761   |                                                                                              |
|            | 9  | (post-concuss* or postconcuss*).tw,kf.                                                                           | 3589    |                                                                                              |
|            | 10 | (mild adj3 (traumatic brain injur* or tbi*).tw,kf.                                                               | 7670    |                                                                                              |
|            | 11 | mtbi*.tw,kf.                                                                                                     | 3606    |                                                                                              |
|            | 12 | (head adj2 (injur* or impact* or trauma*).tw,kf.                                                                 | 36845   |                                                                                              |
|            | 13 | (traumatic brain injur* or tbi*).tw,kf.                                                                          | 52529   |                                                                                              |
|            | 14 | (neurotrauma* or "neuro-trauma").tw,kf.                                                                          | 2453    |                                                                                              |
|            | 15 | (craniocerebral adj2 (trauma* or injur*).tw,kf.                                                                  | 3249    | Additional keywords relevant to repetitive head impact, CTE,                                 |
|            | 16 | ((repetitive or multiple or cumulative) adj3 (head injur* or head impact* or concussion* or head trauma)).tw,kf. | 1024    |                                                                                              |
|            | 17 | ((subconcuss* or sub-concuss*) adj3 (impact* or blow*).tw,kf.                                                    | 234     |                                                                                              |
|            | 18 | (chronic traumatic encephalopath* or CTE).tw,kf.                                                                 | 3908    |                                                                                              |
|            | 19 | (neurodegenerative adj2 (disease* or disorder*).tw,kf.                                                           | 87216   |                                                                                              |
|            | 20 | or/1-19                                                                                                          | 228659  |                                                                                              |
| Sports     | 21 | exp Athletic Injuries/ or exp Athletes/                                                                          | 44656   | Subject heading for athletes                                                                 |

|    |                                                                                                                                                                                                                                                                                                                                                                                                                                                                                                                                                                                                     |        |                                                                                                                                                                                                           |
|----|-----------------------------------------------------------------------------------------------------------------------------------------------------------------------------------------------------------------------------------------------------------------------------------------------------------------------------------------------------------------------------------------------------------------------------------------------------------------------------------------------------------------------------------------------------------------------------------------------------|--------|-----------------------------------------------------------------------------------------------------------------------------------------------------------------------------------------------------------|
| 22 | Sports/ or Return to Sport/ or Sports medicine/                                                                                                                                                                                                                                                                                                                                                                                                                                                                                                                                                     | 44083  | Subject heading for category terms related to sport                                                                                                                                                       |
| 23 | exp baseball/ or exp basketball/ or exp Bicycling/ or exp boxing/ or exp football/ or exp gymnastics/ or exp hockey/ or exp martial arts/ or exp racquet sports/ or exp skating/ or exp Skiing/ or exp snow sports/ or exp soccer/ or exp Swimming/ or exp Tennis/ or exp "track and field"/ or exp volleyball/ or exp water sports/ or exp wrestling/ or exp youth sports/                                                                                                                                                                                                                         | 74998  | Subject headings for the individual sports, as well as youth sports.                                                                                                                                      |
| 24 | (athlete* or athletic* or crew or player* or teammate* or team-mate* or varsity).tw,kf.                                                                                                                                                                                                                                                                                                                                                                                                                                                                                                             | 136483 | Keywords related to athletes                                                                                                                                                                              |
| 25 | sport*.tw,kf,jw.                                                                                                                                                                                                                                                                                                                                                                                                                                                                                                                                                                                    | 172752 | Keyword for sport as a category term and also a keyword in journal title                                                                                                                                  |
| 26 | ((return* or resum* or "re-ent*" or reent*) adj2 (play* or competition* or sport*)),tw,kf.                                                                                                                                                                                                                                                                                                                                                                                                                                                                                                          | 7769   | Keyword combination for return to sport                                                                                                                                                                   |
| 27 | (baseball or basketball or biking or bicycling* or bmx or boxing or "bull rid*" or bullrid* or cheerleading or "cheer leading" or climbing or cricket or diving or equestrian or football or golf or gymnastics or handball or "horse* riding" or hockey or lacrosse or mountaineering or netball or "net ball" or "racquet sport*" or racquetball or ringette or "roller derb*" or rollerskat* or rodeo* or rugby or skateboard* or skating or skiing or snowboard* or "snow sport*" or soccer or softball or squash or swimming or tennis or "track and field" or wrestling or volleyball).tw,kf. | 105845 | Keyword terms for individual sports where concussion is known to occur. This list was created by consulting the list of Olympic sports in addition to all other exploratory methods previously mentioned. |
| 28 | (archery or badminton or bobsled* or bobsleigh* or canoe* or "cross country" or fencing or kayak* or luge or rifle or rowing or sailing or skeleton or "ski jump*" or sledding or surfing or trampolin* or "water polo" or "weight lifting" or windsurfing or yachting).tw,kf.                                                                                                                                                                                                                                                                                                                      | 55489  |                                                                                                                                                                                                           |
| 29 | (aikido or judo or jiu-jitsu or "jiu-jitsu" or jujitsu or "ju jitsu" or karate or kickbox*                                                                                                                                                                                                                                                                                                                                                                                                                                                                                                          | 2801   |                                                                                                                                                                                                           |

|                                                                                                      |                                                                                                    |                                                                                                                                                                                                                                                                                                                                                                                   |        |                                                                 |
|------------------------------------------------------------------------------------------------------|----------------------------------------------------------------------------------------------------|-----------------------------------------------------------------------------------------------------------------------------------------------------------------------------------------------------------------------------------------------------------------------------------------------------------------------------------------------------------------------------------|--------|-----------------------------------------------------------------|
|                                                                                                      |                                                                                                    | or Martial arts or taekwondo or tae kwon do or tai ji).tw,kf.                                                                                                                                                                                                                                                                                                                     |        |                                                                 |
|                                                                                                      | 30                                                                                                 | (capoeira or "Dim mak" or kenpo or "kung fu" or "pencak silat" or pitfight* or savate or "submission fight*" or UFC or "ultimate fighting champion*).tw,kf.                                                                                                                                                                                                                       | 957    |                                                                 |
|                                                                                                      | 31                                                                                                 | (biker* or boxer* or "cheer leader*" or cheerleader* or climber* or cyclist* or diver or divers or fencer* or fighter* or footballer* or goalie* or golfer* or gymnast or gymnasts or "horse* rider*" or jockey* or judoka* or mountaineer* or rower* or sailor* or skater* or skier* or sledder* or snowboarder* or surfer* or swimmer* or "weight lifter*" or wrestler*).tw,kf. | 32985  | Keyword terms relating to the player of the specific sport      |
|                                                                                                      | 32                                                                                                 | or/21-31                                                                                                                                                                                                                                                                                                                                                                          | 411972 | Combination line for Sport concept combined with OR             |
| Long term / residual effects Including Psychological Neurobehavioral Neurodegenerative Brain related | 33                                                                                                 | *Cognitive Dysfunction/                                                                                                                                                                                                                                                                                                                                                           | 24307  | Subject headings / keywords for psychological / neurobehavioral |
|                                                                                                      | 34                                                                                                 | *Cognition Disorders/                                                                                                                                                                                                                                                                                                                                                             | 46701  |                                                                 |
|                                                                                                      | 35                                                                                                 | *Mental Disorders/                                                                                                                                                                                                                                                                                                                                                                | 136398 |                                                                 |
|                                                                                                      | 36                                                                                                 | *substance-related disorders/ or *alcohol-related disorders/ or *marijuana abuse/ or *opioid-related disorders/                                                                                                                                                                                                                                                                   | 98213  |                                                                 |
|                                                                                                      | 37                                                                                                 | ((cognitive or memory or executive) adj2 (impair* or abnormal* or dysfunction* or deficit* or disorder* or disabilit* or decline or disturbance* or deteriorat* or decrement* or sequela*).tw,kf.                                                                                                                                                                                 | 178791 |                                                                 |
|                                                                                                      | 38                                                                                                 | ((drug* or alcohol* or substance) adj2 (dependen* or abuse or disorder*).tw,kf.                                                                                                                                                                                                                                                                                                   | 118831 |                                                                 |
|                                                                                                      | 39                                                                                                 | exp Psychotic Disorders/                                                                                                                                                                                                                                                                                                                                                          | 56032  |                                                                 |
|                                                                                                      | 40                                                                                                 | Depression/                                                                                                                                                                                                                                                                                                                                                                       | 138881 |                                                                 |
|                                                                                                      | 41                                                                                                 | Self-Injurious Behavior/                                                                                                                                                                                                                                                                                                                                                          | 9058   |                                                                 |
|                                                                                                      | 42                                                                                                 | Suicide/ or Suicide, Attempted/                                                                                                                                                                                                                                                                                                                                                   | 59656  |                                                                 |
|                                                                                                      | 43                                                                                                 | Aggression/                                                                                                                                                                                                                                                                                                                                                                       | 35633  |                                                                 |
|                                                                                                      | 44                                                                                                 | Anxiety/ or Anxiety Disorders/                                                                                                                                                                                                                                                                                                                                                    | 127267 |                                                                 |
|                                                                                                      | 45                                                                                                 | exp Anger/                                                                                                                                                                                                                                                                                                                                                                        | 8818   |                                                                 |
|                                                                                                      | 46                                                                                                 | Mood Disorders/                                                                                                                                                                                                                                                                                                                                                                   | 15403  |                                                                 |
|                                                                                                      | 47                                                                                                 | ((psychiatric or mental* or psychological) adj2 (illness or impair* or abnormal* or dysfunction* or deficit* or decline or deteriorat*).tw,kf.                                                                                                                                                                                                                                    | 53795  |                                                                 |
| 48                                                                                                   | ((neuropsychological or neurophysiological or neuropsychiatric or neurocognitive) adj2 (impair* or | 10524                                                                                                                                                                                                                                                                                                                                                                             |        |                                                                 |

|    |                                                                                                                                                                  |        |                                                            |
|----|------------------------------------------------------------------------------------------------------------------------------------------------------------------|--------|------------------------------------------------------------|
|    | abnormal* or dysfunction* or decline or disturbance* or deteriorat*).tw,kf.                                                                                      |        |                                                            |
| 49 | (depress* or suicide or suicidal or aggression or aggressive or anger or angry or rage or anxiety).tw,kf.                                                        | 911698 |                                                            |
| 50 | (mood disorder* or psychos?s).tw,kf.                                                                                                                             | 74503  |                                                            |
| 51 | ((chronic or persistent) adj2 headache*).tw,kf.                                                                                                                  | 5129   |                                                            |
| 52 | Neurodegenerative Diseases/                                                                                                                                      | 22062  | Subject headings / keywords for neurodegenerative diseases |
| 53 | exp Chronic Traumatic Encephalopathy/                                                                                                                            | 317    |                                                            |
| 54 | Dementia/ or Frontotemporal Dementia/                                                                                                                            | 60925  |                                                            |
| 55 | Alzheimer Disease/                                                                                                                                               | 107773 |                                                            |
| 56 | Amyotrophic Lateral Sclerosis/                                                                                                                                   | 21533  |                                                            |
| 57 | Motor Neuron Disease/                                                                                                                                            | 4613   |                                                            |
| 58 | Parkinson Disease, Secondary/ or Parkinson Disease/                                                                                                              | 79513  |                                                            |
| 59 | Hypopituitarism/                                                                                                                                                 | 7377   |                                                            |
| 60 | Seizures/                                                                                                                                                        | 58809  |                                                            |
| 61 | (chronic traumatic encephalopath* or CTE or traumatic encephalopath*).tw,kf.                                                                                     | 4034   |                                                            |
| 62 | ((neurodegenerative or neurobehavioral or neurobehavioural) adj2 (disorder* or disease*).tw,kf.                                                                  | 88176  |                                                            |
| 63 | (dementia pugilistica or punch drunk).tw,kf.                                                                                                                     | 126    |                                                            |
| 64 | (alzheimer* or amyotrophic lateral sclerosis or ALS or parkinson*).tw,kf.                                                                                        | 328445 |                                                            |
| 65 | (motor neuron adj1 (disease* or disorder*).tw,kf.                                                                                                                | 6585   |                                                            |
| 66 | hypopituitarism.tw,kf.                                                                                                                                           | 5449   |                                                            |
| 67 | ((endocrine or hormon* or metabolic) adj2 dysfunction).tw,kf.                                                                                                    | 7304   |                                                            |
| 68 | seizure*.tw,kf.                                                                                                                                                  | 134174 |                                                            |
| 69 | White Matter/                                                                                                                                                    | 11130  | Subject headings / keywords for brain-related              |
| 70 | Tauopathies/                                                                                                                                                     | 2184   |                                                            |
| 71 | TDP-43 Proteinopathies/                                                                                                                                          | 348    |                                                            |
| 72 | *Cerebral Cortex/                                                                                                                                                | 79683  |                                                            |
| 73 | Septum Pellucidum/                                                                                                                                               | 3036   |                                                            |
| 74 | (white matter or taupath* or tau or tap-43 or septum pellucid*).tw,kf.                                                                                           | 112765 |                                                            |
| 75 | (cortical adj2 (thick* or thin*).tw,kf.                                                                                                                          | 11247  |                                                            |
| 76 | ((longterm or long term or permanent or cumulative or chronic or residual) adj2 (consequences or effects or outcome* or sequela* or prognosis or damage*).tw,kf. | 215957 | Keywords for long term / residualeffects                   |



|  |    |                                                                                                                                                                                                                                                                                                                                                                                                                           |         |                                                                              |
|--|----|---------------------------------------------------------------------------------------------------------------------------------------------------------------------------------------------------------------------------------------------------------------------------------------------------------------------------------------------------------------------------------------------------------------------------|---------|------------------------------------------------------------------------------|
|  | 77 | or/33-76                                                                                                                                                                                                                                                                                                                                                                                                                  | 2309799 | Combination line for long term/residual concept combined with OR             |
|  | 78 | 20 and 32 and 77                                                                                                                                                                                                                                                                                                                                                                                                          | 4244    | Final combination line: Concussion AND Sports AND Long Term/Residual Effects |
|  | 79 | (address or autobiography or bibliography or biography or congress or dataset or dictionary or directory or editorial or "expression of concern" or festschrift or government document or interactive tutorial or interview or lecture or legal case or legislation or letter or news or newspaper article or overall or patient education handout or periodical index or personal narrative or portrait or webcasts).pt. | 2325495 | Publication types                                                            |
|  | 80 | 78 not 79                                                                                                                                                                                                                                                                                                                                                                                                                 | 4122    | Excludes above publication types from search                                 |
|  | 81 | limit 80 to "humans only (removes records about animals)"                                                                                                                                                                                                                                                                                                                                                                 | 3661    | Limiting to humans only                                                      |
|  | 82 | limit 81 to english language                                                                                                                                                                                                                                                                                                                                                                                              | 3580    | Limiting to English language only                                            |
|  | 83 | limit 82 to yr="2001 - 2022"                                                                                                                                                                                                                                                                                                                                                                                              | 3385    | Date limit                                                                   |

902  
903  
904

#### Embase (via OVID) as searched March 25, 2022

| #  | Searches                                                                                                         | Results |
|----|------------------------------------------------------------------------------------------------------------------|---------|
| 1  | brain concussion/                                                                                                | 6584    |
| 2  | concussion/                                                                                                      | 7419    |
| 3  | postconcussion syndrome/                                                                                         | 2775    |
| 4  | traumatic brain injury/                                                                                          | 57267   |
| 5  | brain injury/                                                                                                    | 92179   |
| 6  | exp chronic traumatic encephalopathy/                                                                            | 1196    |
| 7  | degenerative disease/                                                                                            | 62650   |
| 8  | (concussion* or concussed or concussive or subconcuss* or sub-concuss*).tw,kf.                                   | 15681   |
| 9  | (post-concuss* or postconcuss*).tw,kf.                                                                           | 5068    |
| 10 | (mild adj3 (traumatic brain injur* or tbi*).tw,kf.                                                               | 11469   |
| 11 | mtbi*.tw,kf.                                                                                                     | 5817    |
| 12 | (head adj2 (injur* or impact* or trauma*).tw,kf.                                                                 | 47983   |
| 13 | (traumatic brain injur* or tbi*).tw,kf.                                                                          | 81182   |
| 14 | (neurotrauma* or "neuro-trauma").tw,kf.                                                                          | 3745    |
| 15 | (craniocerebral adj2 (trauma* or injur*).tw,kf.                                                                  | 3738    |
| 16 | ((repetitive or multiple or cumulative) adj3 (head injur* or head impact* or concussion* or head trauma)).tw,kf. | 1488    |

|    |                                                                                                                                                                                                                                                                                                                                                                                                                                                                                                                                                                                                                  |        |
|----|------------------------------------------------------------------------------------------------------------------------------------------------------------------------------------------------------------------------------------------------------------------------------------------------------------------------------------------------------------------------------------------------------------------------------------------------------------------------------------------------------------------------------------------------------------------------------------------------------------------|--------|
| 17 | ((subconcuss* or sub-concuss*) adj3 (impact* or blow*).tw,kf.                                                                                                                                                                                                                                                                                                                                                                                                                                                                                                                                                    | 315    |
| 18 | (chronic traumatic encephalopathy* or CTE).tw,kf.                                                                                                                                                                                                                                                                                                                                                                                                                                                                                                                                                                | 3097   |
| 19 | (neurodegenerative adj2 (disease* or disorder*).tw,kf.                                                                                                                                                                                                                                                                                                                                                                                                                                                                                                                                                           | 116189 |
| 20 | or/1-19                                                                                                                                                                                                                                                                                                                                                                                                                                                                                                                                                                                                          | 354133 |
| 21 | athlete/ or basketball player/ or body builder/ or boxer/ or cyclist/ or football player/ or hockey player/ or judoka/ or skier/ or soccer player/ or triathlete/ or wrestler/                                                                                                                                                                                                                                                                                                                                                                                                                                   | 61342  |
| 22 | sport/ or aquatic sport/ or exp athletics/ or baseball/ or basketball/ or body building/ or boxing/ or exp combat sport/ or contact sport/ or "cricket (sport)"/ or cycling/ or diving/ or endurance sport/ or extreme sport/ or football/ or hockey/ or horseback riding/ or ice hockey/ or martial art/ or mountaineering/ or exp racquet sport/ or rock climbing/ or roller skating/ or rowing/ or rugby/ or skateboarding/ or skating/ or skiing/ or soccer/ or swimming/ or team sport/ or exp tennis/ or "track and field"/ or volleyball/ or water skiing/ or winter sport/ or wrestling/ or youth sport/ | 145402 |
| 23 | sport injury/                                                                                                                                                                                                                                                                                                                                                                                                                                                                                                                                                                                                    | 32548  |
| 24 | sports medicine/                                                                                                                                                                                                                                                                                                                                                                                                                                                                                                                                                                                                 | 18183  |
| 25 | return to sport/                                                                                                                                                                                                                                                                                                                                                                                                                                                                                                                                                                                                 | 4368   |
| 26 | (athlete* or athletic* or crew or player* or teammate* or team-mate* or varsity).tw,kf.                                                                                                                                                                                                                                                                                                                                                                                                                                                                                                                          | 164308 |
| 27 | sport*.tw,kf,jx.                                                                                                                                                                                                                                                                                                                                                                                                                                                                                                                                                                                                 | 204507 |
| 28 | ((return* or resum* or "re-ent*" or reent*) adj2 (play* or competition* or sport*).tw,kf.                                                                                                                                                                                                                                                                                                                                                                                                                                                                                                                        | 9519   |
| 29 | (baseball or basketball or biking or bicycling* or bmx or boxing or "bull rid*" or bullrid* or cheerleading or "cheer leading" or climbing or cricket or diving or equestrian or football or golf or gymnastics or handball or "horse* riding" or hockey or lacrosse or mountaineering or netball or "net ball" or "racquet sport*" or racquetball or ringette or "roller derb*" or rollerskat* or rodeo* or rugby or skateboard* or skating or skiing or snowboard* or "snow sport*" or soccer or softball or squash or swimming or tennis or "track and field" or wrestling or volleyball).tw,kf.              | 123107 |
| 30 | (archery or badminton or bobsled* or bobsleigh* or canoe* or "cross country" or fencing or kayak* or luge or rifle or rowing or sailing or skeleton or "ski jump*" or sledding or surfing or trampolin* or "water polo" or "weight lifting" or windsurfing or yachting).tw,kf.                                                                                                                                                                                                                                                                                                                                   | 70435  |
| 31 | (aikido or judo or jiujitsu or "ju-jitsu" or jujitsu or "ju jitsu" or karate or kickbox* or "Martial art*" or taekwondo or "tae kwon do" or "tai ji").tw,kf.                                                                                                                                                                                                                                                                                                                                                                                                                                                     | 3379   |
| 32 | (capoeira or "Dim mak" or kenpo or "kung fu" or "pencak silat" or pitfight* or savate or "submission fight*" or UFC or "ultimate fighting champion*").tw,kf.                                                                                                                                                                                                                                                                                                                                                                                                                                                     | 1489   |
| 33 | (biker* or boxer* or "cheer leader*" or cheerleader* or climber* or cyclist* or diver or divers or fencer* or fighter* or footballer* or goalie* or golfer* or gymnast or gymnasts or "horse* rider*" or jockey* or judoka* or mountaineer* or rower* or sailor* or skater* or skier* or sledder* or snowboarder* or surfer* or swimmer* or "weight lifter*" or wrestler*).tw,kf.                                                                                                                                                                                                                                | 37063  |
| 34 | or/21-33                                                                                                                                                                                                                                                                                                                                                                                                                                                                                                                                                                                                         | 498805 |
| 35 | 20 and 34                                                                                                                                                                                                                                                                                                                                                                                                                                                                                                                                                                                                        | 17286  |
| 36 | cognitive defect/ or mild cognitive impairment/                                                                                                                                                                                                                                                                                                                                                                                                                                                                                                                                                                  | 215242 |
| 37 | mental disease/ or confusion/ or emotional disorder/ or memory disorder/ or thought disorder/                                                                                                                                                                                                                                                                                                                                                                                                                                                                                                                    | 329250 |
| 38 | substance abuse/ or exp drug dependence/                                                                                                                                                                                                                                                                                                                                                                                                                                                                                                                                                                         | 295874 |

|    |                                                                                                                                                                                                     |         |
|----|-----------------------------------------------------------------------------------------------------------------------------------------------------------------------------------------------------|---------|
| 39 | ((cognitive or memory or executive) adj2 (impair* or abnormal* or dysfunction* or deficit* or disorder* or disabilit* or decline or disturbance* or deteriorat* or decrement* or sequela*).tw,kf.   | 265479  |
| 40 | ((drug* or alcohol* or substance) adj2 (dependen* or abuse or disorder*).tw,kf.                                                                                                                     | 168851  |
| 41 | exp psychosis/                                                                                                                                                                                      | 298779  |
| 42 | depression/ or agitated depression/ or atypical depression/ or chronic depression/ or major depression/ or minor depression/ or "mixed anxiety and depression"/ or "mixed depression and dementia"/ | 475077  |
| 43 | automutilation/                                                                                                                                                                                     | 21020   |
| 44 | suicide attempt/ or suicide/                                                                                                                                                                        | 88168   |
| 45 | aggression/ or aggressiveness/ or hostility/                                                                                                                                                        | 79363   |
| 46 | anxiety disorder/ or anxiety/ or generalized anxiety disorder/                                                                                                                                      | 323805  |
| 47 | anger/ or rage/                                                                                                                                                                                     | 21303   |
| 48 | mood disorder/                                                                                                                                                                                      | 47710   |
| 49 | ((psychiatric or mental* or psychological) adj2 (illness or impair* or abnormal* or dysfunction* or deficit* or decline or deteriorat*).tw,kf.                                                      | 71902   |
| 50 | ((neuropsychological or neurophysiological or neuropsychiatric or neurocognitive) adj2 (impair* or abnormal* or dysfunction* or decline or disturbance* or deteriorat*).tw,kf.                      | 15806   |
| 51 | (depress* or suicide or suicidal or aggression or aggressive or anger or angry or rage or anxiety).tw,kf.                                                                                           | 1236556 |
| 52 | (mood disorder* or psychos?s).tw,kf.                                                                                                                                                                | 101186  |
| 53 | ((chronic or persistent) adj2 headache*).tw,kf.                                                                                                                                                     | 8546    |
| 54 | degenerative disease/                                                                                                                                                                               | 62650   |
| 55 | exp chronic traumatic encephalopathy/                                                                                                                                                               | 1196    |
| 56 | dementia/ or frontotemporal dementia/                                                                                                                                                               | 142633  |
| 57 | Alzheimer disease/                                                                                                                                                                                  | 223738  |
| 58 | amyotrophic lateral sclerosis/                                                                                                                                                                      | 42962   |
| 59 | motor neuron disease/                                                                                                                                                                               | 11175   |
| 60 | Parkinson disease/                                                                                                                                                                                  | 172147  |
| 61 | hypopituitarism/                                                                                                                                                                                    | 12252   |
| 62 | seizure/                                                                                                                                                                                            | 159730  |
| 63 | (chronic traumatic encephalopath* or CTE or traumatic encephalopath*).tw,kf.                                                                                                                        | 3212    |
| 64 | ((neurodegenerative or neurobehavioral or neurobehavioural) adj2 (disorder* or disease*).tw,kf.                                                                                                     | 117490  |
| 65 | (dementia pugilistica or punch drunk).tw,kf.                                                                                                                                                        | 169     |
| 66 | (alzheimer* or amyotrophic lateral sclerosis or ALS or parkinson*).tw,kf.                                                                                                                           | 450191  |
| 67 | (motor neuron adj1 (disease* or disorder*).tw,kf.                                                                                                                                                   | 9843    |
| 68 | hypopituitarism.tw,kf.                                                                                                                                                                              | 6957    |
| 69 | ((endocrine or hormon* or metabolic) adj2 dysfunction).tw,kf.                                                                                                                                       | 10577   |
| 70 | seizure*.tw,kf.                                                                                                                                                                                     | 202981  |
| 71 | white matter/                                                                                                                                                                                       | 72759   |
| 72 | tauopathy/                                                                                                                                                                                          | 6631    |
| 73 | TDP 43 proteinopathy/                                                                                                                                                                               | 1477    |
| 74 | *brain cortex/                                                                                                                                                                                      | 42734   |

|    |                                                                                                                                                                   |         |
|----|-------------------------------------------------------------------------------------------------------------------------------------------------------------------|---------|
| 75 | septum pellucidum/                                                                                                                                                | 4851    |
| 76 | (white matter or taupath* or tau or tap-43 or septum pellucid*).tw,kf.                                                                                            | 157033  |
| 77 | (cortical adj2 (thick* or thin*)).tw,kf.                                                                                                                          | 17623   |
| 78 | ((longterm or long term or permanent or cumulative or chronic or residual) adj2 (consequences or effects or outcome* or sequela* or prognosis or damage*)).tw,kf. | 312745  |
| 79 | or/36-78                                                                                                                                                          | 3474720 |
| 80 | 35 and 79                                                                                                                                                         | 7023    |
| 81 | limit 80 to conference abstracts                                                                                                                                  | 1704    |
| 82 | 80 not 81                                                                                                                                                         | 5319    |
| 83 | limit 82 to (books or chapter or conference abstract or editorial or letter or note or tombstone)                                                                 | 396     |
| 84 | 82 not 83                                                                                                                                                         | 4923    |
| 85 | limit 84 to "humans only (removes records about animals)"                                                                                                         | 4247    |
| 86 | limit 85 to english language                                                                                                                                      | 4111    |
| 87 | limit 86 to yr="2001 - 2022"                                                                                                                                      | 3895    |

905  
906  
907

#### Cochrane Central Register of Controlled Trials (via OVID) as searched March 25, 2022

| #  | Searches                                                                                                                                                                            | Results |
|----|-------------------------------------------------------------------------------------------------------------------------------------------------------------------------------------|---------|
| 1  | exp Brain Concussion/                                                                                                                                                               | 442     |
| 2  | Post-Concussion Syndrome/                                                                                                                                                           | 164     |
| 3  | Cranio cerebral Trauma/                                                                                                                                                             | 338     |
| 4  | Brain Injuries/ or Brain Injuries, Traumatic/                                                                                                                                       | 2310    |
| 5  | Brain Injury, Chronic/                                                                                                                                                              | 36      |
| 6  | exp Chronic Traumatic Encephalopathy/                                                                                                                                               | 36      |
| 7  | Neurodegenerative Diseases/                                                                                                                                                         | 102     |
| 8  | (concussion* or concussed or concussive or subconcuss* or sub-concuss*).tw,kw.                                                                                                      | 891     |
| 9  | (post-concuss* or postconcuss*).tw,kw.                                                                                                                                              | 530     |
| 10 | (mild adj3 (traumatic brain injur* or tbi*)).tw,kw.                                                                                                                                 | 888     |
| 11 | mtbi*.tw,kw.                                                                                                                                                                        | 429     |
| 12 | (head adj2 (injur* or impact* or trauma*)).tw,kw.                                                                                                                                   | 2500    |
| 13 | (traumatic brain injur* or tbi*).tw,kw.                                                                                                                                             | 5843    |
| 14 | (neurotrauma* or "neuro-trauma").tw,kw.                                                                                                                                             | 131     |
| 15 | (cranio cerebral adj2 (trauma* or injur*)).tw,kw.                                                                                                                                   | 143     |
| 16 | ((repetitive or multiple or cumulative) adj3 (head injury* or head impact* or concussion* or head trauma)).tw,kw.                                                                   | 50      |
| 17 | ((subconcuss* or sub-concuss*) adj3 (impact* or blow*)).tw,kw.                                                                                                                      | 22      |
| 18 | (chronic traumatic encephalopathy or CTE).tw,kw.                                                                                                                                    | 104     |
| 19 | (neurodegenerative adj2 (disease* or disorder*)).tw,kw.                                                                                                                             | 1525    |
| 20 | or/1-19                                                                                                                                                                             | 10693   |
| 21 | exp Athletic Injuries/ or exp Athletes/                                                                                                                                             | 1804    |
| 22 | Sports/ or Return to Sport/ or Sports medicine/                                                                                                                                     | 1099    |
| 23 | exp baseball/ or exp basketball/ or exp Bicycling/ or exp boxing/ or exp football/ or exp gymnastics/ or exp hockey/ or exp martial arts/ or exp racquet sports/ or exp skating/ or | 4565    |

|    |                                                                                                                                                                                                                                                                                                                                                                                                                                                                                                                                                                                                     |       |
|----|-----------------------------------------------------------------------------------------------------------------------------------------------------------------------------------------------------------------------------------------------------------------------------------------------------------------------------------------------------------------------------------------------------------------------------------------------------------------------------------------------------------------------------------------------------------------------------------------------------|-------|
|    | exp Skiing/ or exp snow sports/ or exp soccer/ or exp Swimming/ or exp Tennis/ or exp "track and field"/ or exp volleyball/ or exp water sports/ or exp wrestling/ or exp youth sports/                                                                                                                                                                                                                                                                                                                                                                                                             |       |
| 24 | (athlete* or athletic* or crew or player* or teammate* or team-mate* or varsity).tw,kw.                                                                                                                                                                                                                                                                                                                                                                                                                                                                                                             | 12054 |
| 25 | sport*.tw,kw,jw.                                                                                                                                                                                                                                                                                                                                                                                                                                                                                                                                                                                    | 20165 |
| 26 | ((return* or resum* or "re-ent*" or reent*) adj2 (play* or competition* or sport*)).tw,kw.                                                                                                                                                                                                                                                                                                                                                                                                                                                                                                          | 631   |
| 27 | (baseball or basketball or biking or bicycling* or bmx or boxing or "bull rid*" or bullrid* or cheerleading or "cheer leading" or climbing or cricket or diving or equestrian or football or golf or gymnastics or handball or "horse* riding" or hockey or lacrosse or mountaineering or netball or "net ball" or "racquet sport*" or racquetball or ringette or "roller derb*" or rollerskat* or rodeo* or rugby or skateboard* or skating or skiing or snowboard* or "snow sport*" or soccer or softball or squash or swimming or tennis or "track and field" or wrestling or volleyball).tw,kw. | 8820  |
| 28 | (archery or badminton or bobsled* or bobsleigh* or canoe* or "cross country" or fencing or kayak* or luge or rifle or rowing or sailing or skeleton or "ski jump*" or sledding or surfing or trampoline* or "water polo" or "weight lifting" or windsurfing or yachting).tw,kw.                                                                                                                                                                                                                                                                                                                     | 2405  |
| 29 | (archery or badminton or bobsled* or bobsleigh* or canoe* or "cross country" or fencing or kayak* or luge or rifle or rowing or sailing or skeleton or "ski jump*" or sledding or surfing or trampoline* or "water polo" or "weight lifting" or windsurfing or yachting).tw,kw.                                                                                                                                                                                                                                                                                                                     | 2405  |
| 30 | (capoeira or "Dim mak" or kenpo or "kung fu" or "pencak silat" or pitfight* or savate or "submission fight*" or UFC or "ultimate fighting champion*").tw,kw.                                                                                                                                                                                                                                                                                                                                                                                                                                        | 164   |
| 31 | (biker* or boxer* or "cheer leader*" or cheerleader* or climber* or cyclist* or diver or divers or fencer* or fighter* or footballer* or goalie* or golfer* or gymnast or gymnasts or "horse* rider*" or jockey* or judoka* or mountaineer* or rower* or sailor* or skater* or skier* or sledder* or snowboarder* or surfer* or swimmer* or "weight lifter*" or wrestler*).tw,kw.                                                                                                                                                                                                                   | 3349  |
| 32 | or/21-31                                                                                                                                                                                                                                                                                                                                                                                                                                                                                                                                                                                            | 35828 |
| 33 | *Cognitive Dysfunction/                                                                                                                                                                                                                                                                                                                                                                                                                                                                                                                                                                             | 0     |
| 34 | *Cognition Disorders/                                                                                                                                                                                                                                                                                                                                                                                                                                                                                                                                                                               | 0     |
| 35 | *Mental Disorders/                                                                                                                                                                                                                                                                                                                                                                                                                                                                                                                                                                                  | 0     |
| 36 | *substance-related disorders/ or *alcohol-related disorders/ or *marijuana abuse/ or *opioid-related disorders/                                                                                                                                                                                                                                                                                                                                                                                                                                                                                     | 17    |
| 37 | ((cognitive or memory or executive) adj2 (impair* or abnormal* or dysfunction* or deficit* or disorder* or disabilit* or decline or disturbance* or deteriorat* or decrement* or sequela*)).tw,kw.                                                                                                                                                                                                                                                                                                                                                                                                  | 23412 |
| 38 | ((drug* or alcohol* or substance) adj2 (dependen* or abuse or disorder*)).tw,kw.                                                                                                                                                                                                                                                                                                                                                                                                                                                                                                                    | 19653 |
| 39 | exp Psychotic Disorders/                                                                                                                                                                                                                                                                                                                                                                                                                                                                                                                                                                            | 3166  |
| 40 | Depression/                                                                                                                                                                                                                                                                                                                                                                                                                                                                                                                                                                                         | 13498 |
| 41 | Self-Injurious Behavior/                                                                                                                                                                                                                                                                                                                                                                                                                                                                                                                                                                            | 343   |
| 42 | Suicide/ or Suicide, Attempted/                                                                                                                                                                                                                                                                                                                                                                                                                                                                                                                                                                     | 1111  |
| 43 | Aggression/                                                                                                                                                                                                                                                                                                                                                                                                                                                                                                                                                                                         | 1249  |
| 44 | Anxiety/ or Anxiety Disorders/                                                                                                                                                                                                                                                                                                                                                                                                                                                                                                                                                                      | 12147 |
| 45 | exp Anger/                                                                                                                                                                                                                                                                                                                                                                                                                                                                                                                                                                                          | 478   |
| 46 | Mood Disorders/                                                                                                                                                                                                                                                                                                                                                                                                                                                                                                                                                                                     | 878   |

|    |                                                                                                                                                                                 |        |
|----|---------------------------------------------------------------------------------------------------------------------------------------------------------------------------------|--------|
| 47 | ((psychiatric or mental* or psychological) adj2 (illness or impair* or abnormal* or dysfunction* or deficit* or decline or deteriorat*)).tw,kw.                                 | 7148   |
| 48 | ((neuropsychological or neurophysiological or neuropsychiatric or neurocognitive) adj2 (impair* or abnormal* or dysfunction* or decline or disturbance* or deteriorat*)).tw,kw. | 1239   |
| 49 | (depress* or suicide or suicidal or aggression or aggressive or anger or angry or rage or anxiety).tw,kw.                                                                       | 134358 |
| 50 | (mood disorder* or psychos?s).tw,kw.                                                                                                                                            | 9466   |
| 51 | ((chronic or persistent) adj2 headache*).tw,kw.                                                                                                                                 | 972    |
| 52 | Neurodegenerative Diseases/                                                                                                                                                     | 102    |
| 53 | exp Chronic Traumatic Encephalopathy/                                                                                                                                           | 36     |
| 54 | Dementia/ or Frontotemporal Dementia/                                                                                                                                           | 2640   |
| 55 | Alzheimer Disease/                                                                                                                                                              | 3674   |
| 56 | Amyotrophic Lateral Sclerosis/                                                                                                                                                  | 610    |
| 57 | Motor Neuron Disease/                                                                                                                                                           | 297    |
| 58 | Parkinson Disease, Secondary/ or Parkinson Disease/                                                                                                                             | 4673   |
| 59 | Hypopituitarism/                                                                                                                                                                | 170    |
| 60 | Seizures/                                                                                                                                                                       | 967    |
| 61 | (chronic traumatic encephalopath* or CTE or traumatic encephalopath*).tw,kw.                                                                                                    | 111    |
| 62 | ((neurodegenerative or neurobehavioral or neurobehavioural) adj2 (disorder* or disease*)).tw,kw.                                                                                | 1586   |
| 63 | (dementia pugilistica or punch drunk).tw,kw.                                                                                                                                    | 1      |
| 64 | (alzheimer* or amyotrophic lateral sclerosis or ALS or parkinson*).tw,kw.                                                                                                       | 26664  |
| 65 | (motor neuron adj1 (disease* or disorder*)).tw,kw.                                                                                                                              | 211    |
| 66 | hypopituitarism.tw,kw.                                                                                                                                                          | 207    |
| 67 | ((endocrine or hormon* or metabolic) adj2 dysfunction).tw,kw.                                                                                                                   | 453    |
| 68 | seizure*.tw,kw.                                                                                                                                                                 | 9241   |
| 69 | White Matter/                                                                                                                                                                   | 117    |
| 70 | Tauopathies/                                                                                                                                                                    | 9      |
| 71 | TDP-43 Proteinopathies/                                                                                                                                                         | 1      |
| 72 | *Cerebral Cortex/                                                                                                                                                               | 21     |
| 73 | Septum Pellucidum/                                                                                                                                                              | 1      |
| 74 | (white matter or taupath* or tau or tap-43 or septum pellucid*).tw,kw.                                                                                                          | 7626   |
| 75 | (cortical adj2 (thick* or thin*)).tw,kw.                                                                                                                                        | 663    |
| 76 | ((longterm or long term or permanent or cumulative or chronic or residual) adj2 (consequences or effects or outcome* or sequela* or prognosis or damage*)).tw,kw.               | 32074  |
| 77 | or/33-76                                                                                                                                                                        | 239846 |
| 78 | 20 and 32 and 77                                                                                                                                                                | 140    |
| 79 | limit 78 to english language                                                                                                                                                    | 88     |
| 80 | limit 79 to yr="2001 - 2022"                                                                                                                                                    | 86     |

908  
909  
910

**APA PsycInfo (via OVID) as searched March 25, 2022**

| # | Searches                | Results |
|---|-------------------------|---------|
| 1 | Traumatic Brain Injury/ | 19931   |

|    |                                                                                                                                                                                                                                                                                                                                                                                                                                                                                                                                                                                |       |
|----|--------------------------------------------------------------------------------------------------------------------------------------------------------------------------------------------------------------------------------------------------------------------------------------------------------------------------------------------------------------------------------------------------------------------------------------------------------------------------------------------------------------------------------------------------------------------------------|-------|
| 2  | Brain Concussion/                                                                                                                                                                                                                                                                                                                                                                                                                                                                                                                                                              | 2809  |
| 3  | head injuries/ or brain injuries/                                                                                                                                                                                                                                                                                                                                                                                                                                                                                                                                              | 5591  |
| 4  | exp Encephalopathies/                                                                                                                                                                                                                                                                                                                                                                                                                                                                                                                                                          | 5255  |
| 5  | neurodegenerative diseases/                                                                                                                                                                                                                                                                                                                                                                                                                                                                                                                                                    | 6968  |
| 6  | (concussion* or concussed or concussive or subconcuss* or sub-concuss*).tw,id.                                                                                                                                                                                                                                                                                                                                                                                                                                                                                                 | 4254  |
| 7  | (post-concuss* or postconcuss*).tw,id.                                                                                                                                                                                                                                                                                                                                                                                                                                                                                                                                         | 2036  |
| 8  | (mild adj3 (traumatic brain injur* or tbi*).tw,id.                                                                                                                                                                                                                                                                                                                                                                                                                                                                                                                             | 4508  |
| 9  | mtbi*.tw,id.                                                                                                                                                                                                                                                                                                                                                                                                                                                                                                                                                                   | 2254  |
| 10 | (head adj2 (injur* or impact* or trauma*).tw,id.                                                                                                                                                                                                                                                                                                                                                                                                                                                                                                                               | 8690  |
| 11 | (traumatic brain injur* or tbi*).tw,id.                                                                                                                                                                                                                                                                                                                                                                                                                                                                                                                                        | 20603 |
| 12 | (craniocerebral adj2 (trauma* or injur*).tw,id.                                                                                                                                                                                                                                                                                                                                                                                                                                                                                                                                | 204   |
| 13 | ((repetitive or multiple or cumulative) adj3 (head injur* or head impact* or concussion* or head trauma)).tw,id.                                                                                                                                                                                                                                                                                                                                                                                                                                                               | 375   |
| 14 | ((subconcuss* or sub-concuss*) adj3 (impact* or blow*).tw,id.                                                                                                                                                                                                                                                                                                                                                                                                                                                                                                                  | 105   |
| 15 | (chronic traumatic encephalopath* or CTE).tw,id.                                                                                                                                                                                                                                                                                                                                                                                                                                                                                                                               | 682   |
| 16 | (neurodegenerative adj2 (disease* or disorder*).tw,id.                                                                                                                                                                                                                                                                                                                                                                                                                                                                                                                         | 17717 |
| 17 | or/1-16                                                                                                                                                                                                                                                                                                                                                                                                                                                                                                                                                                        | 56507 |
| 18 | sports/                                                                                                                                                                                                                                                                                                                                                                                                                                                                                                                                                                        | 21221 |
| 19 | baseball/ or basketball/ or extreme sports/ or football/ or judo/ or martial arts/ or soccer/ or swimming/ or tennis/ or weightlifting/                                                                                                                                                                                                                                                                                                                                                                                                                                        | 10581 |
| 20 | athletes/ or athletic participation/ or athletic performance/ or athletic training/ or college athletes/ or competition/                                                                                                                                                                                                                                                                                                                                                                                                                                                       | 35755 |
| 21 | sports medicine/                                                                                                                                                                                                                                                                                                                                                                                                                                                                                                                                                               | 185   |
| 22 | (athlete* or athletic* or crew or player* or teammate* or team-mate* or varsity).tw,id.                                                                                                                                                                                                                                                                                                                                                                                                                                                                                        | 44912 |
| 23 | sport*.tw,id,jx.                                                                                                                                                                                                                                                                                                                                                                                                                                                                                                                                                               | 47192 |
| 24 | ((return* or resum* or "re-ent*" or reent*) adj2 (play* or competition* or sport*).tw,id.                                                                                                                                                                                                                                                                                                                                                                                                                                                                                      | 605   |
| 25 | (baseball or basketball or biking or bicycling* or bmx or boxing or "bull rid*" or bullrid* or cheerleading or "cheer leading" or climbing or cricket or diving or equestrian or football or golf or gymnastics or handball or "horse* riding" or hockey or lacrosse or mountaineering or netball or net ball or racquet sport* or racquetball or ringette or rodeo* or "roller derb*" or rugby or skateboard* or skating or skiing or snowboard* or snow sport* or soccer or softball or squash or swimming or tennis or "track and field" or wrestling or volleyball).tw,id. | 30440 |
| 26 | (archery or badminton or bobsled* or bobsleigh* or canoe* or "cross country" or fencing or kayak* or luge or rifle or "roller derb*" or rollerskat* or rowing or sailing or skeleton or "ski jump*" or sledding or surfing or trampoline* or "water polo" or "weight lifting" or windsurfing or yachting).tw,id.                                                                                                                                                                                                                                                               | 5078  |
| 27 | (aikido or judo or jiu-jitsu or "ju-jitsu" or jujitsu or "ju jitsu" or karate or kickbox* or "Martial art*" or taekwondo or "tae kwon do" or "tai ji").tw,id.                                                                                                                                                                                                                                                                                                                                                                                                                  | 1224  |
| 28 | (capoeira or "Dim mak" or kenpo or "kung fu" or "pencak silat" or pitfight* or savate or "submission fight*" or UFC or "ultimate fighting champion*).tw,id.                                                                                                                                                                                                                                                                                                                                                                                                                    | 197   |
| 29 | (biker* or boxer* or "cheer leader*" or cheerleader* or climber* or cyclist* or diver or divers or fencer* or fighter* or footballer* or goalie* or golfer* or gymnast or gymnasts or "horse* rider*" or jockey* or judoka* or mountaineer* or rower* or sailor* or skater* or skier* or sledder* or snowboarder* or surfer* or swimmer* or "weight lifter*" or wrestler*).tw,id.                                                                                                                                                                                              | 8306  |

|    |                                                                                                                                                                                                                                |        |
|----|--------------------------------------------------------------------------------------------------------------------------------------------------------------------------------------------------------------------------------|--------|
| 30 | or/18-29                                                                                                                                                                                                                       | 109618 |
| 31 | *cognitive impairment/ or Cognitive ability/ or exp Cognitive Processes/                                                                                                                                                       | 866518 |
| 32 | mental disorders/ or exp neurocognitive disorders/ or exp personality disorders/ or exp "stress and trauma related disorders"/ or exp thought disturbances/                                                                    | 265885 |
| 33 | "substance use disorder"/ or "substance related and addictive disorders"/ or addiction/ or "alcohol use disorder"/ or drug abuse/ or drug dependency/ or "opioid use disorder"/ or drug addiction/ or "Cannabis Use Disorder"/ | 87650  |
| 34 | ((cognitive or memory or executive) adj2 (impair* or abnormal* or dysfunction* or deficit* or disorder* or disabilit* or decline or disturbance* or deteriorat* or decrement* or sequela*)).tw,id.                             | 109047 |
| 35 | ((drug* or alcohol* or substance) adj2 (dependen* or abuse or disorder*)).tw,id.                                                                                                                                               | 104863 |
| 36 | exp Psychosis/                                                                                                                                                                                                                 | 123272 |
| 37 | exp "Depression (Emotion)"/ or exp Major Depression/                                                                                                                                                                           | 171291 |
| 38 | exp Self-Destructive Behavior/ or exp Self-Injurious Behavior/ or exp Self-Mutilation/                                                                                                                                         | 45240  |
| 39 | exp Attempted Suicide/ or exp Suicide/                                                                                                                                                                                         | 37929  |
| 40 | exp Aggressive Behavior/ or exp Aggressiveness/                                                                                                                                                                                | 176805 |
| 41 | Anxiety Disorders/ or Anxiety/                                                                                                                                                                                                 | 87306  |
| 42 | exp anger/ or anger control/                                                                                                                                                                                                   | 16317  |
| 43 | affective disorders/                                                                                                                                                                                                           | 15161  |
| 44 | ((psychiatric or mental* or psychological) adj2 (illness or impair* or abnormal* or dysfunction* or deficit* or decline or deteriorat*)).tw,id.                                                                                | 61781  |
| 45 | ((neuropsychological or neurophysiological or neuropsychiatric or neurocognitive) adj2 (impair* or abnormal* or dysfunction* or decline or disturbance* or deteriorat*)).tw,id.                                                | 6691   |
| 46 | (depress* or suicide or suicidal or aggression or aggressive or anger or angry or rage or anxiety).tw,id.                                                                                                                      | 597569 |
| 47 | (mood disorder* or psychos?s).tw,id.                                                                                                                                                                                           | 75768  |
| 48 | ((chronic or persistent) adj2 headache*).tw,id.                                                                                                                                                                                | 2005   |
| 49 | exp neurodegenerative diseases/                                                                                                                                                                                                | 88002  |
| 50 | encephalopathies/                                                                                                                                                                                                              | 3383   |
| 51 | exp Dementia/ or exp Dementia with Lewy Bodies/                                                                                                                                                                                | 85254  |
| 52 | alzheimer's disease/                                                                                                                                                                                                           | 51424  |
| 53 | Amyotrophic Lateral Sclerosis/                                                                                                                                                                                                 | 4220   |
| 54 | nervous system disorders/                                                                                                                                                                                                      | 17084  |
| 55 | exp parkinson's disease/                                                                                                                                                                                                       | 27095  |
| 56 | hypopituitarism/                                                                                                                                                                                                               | 170    |
| 57 | seizures/                                                                                                                                                                                                                      | 12029  |
| 58 | (chronic traumatic encephalopath* or CTE or traumatic encephalopath*).tw,id.                                                                                                                                                   | 709    |
| 59 | ((neurodegenerative or neurobehavioral or neurobehavioural) adj2 (disorder* or disease*)).tw,id.                                                                                                                               | 18254  |
| 60 | (dementia pugilistica or punch drunk).tw,id.                                                                                                                                                                                   | 56     |
| 61 | (alzheimer* or amyotrophic lateral sclerosis or ALS or parkinson*).tw,id.                                                                                                                                                      | 116374 |
| 62 | (motor neuron adj1 (disease* or disorder*)).tw,id.                                                                                                                                                                             | 1333   |
| 63 | hypopituitarism.tw,id.                                                                                                                                                                                                         | 164    |
| 64 | ((endocrine or hormon* or metabolic) adj2 dysfunction).tw,id.                                                                                                                                                                  | 706    |



|    |                                                                                                                                                                   |         |
|----|-------------------------------------------------------------------------------------------------------------------------------------------------------------------|---------|
| 65 | seizure*.tw,id.                                                                                                                                                   | 33552   |
| 66 | White Matter/                                                                                                                                                     | 10165   |
| 67 | *Cerebral Cortex/                                                                                                                                                 | 14906   |
| 68 | (white matter or taupath* or tau or tap-43 or septum pellucid*).tw,id.                                                                                            | 31480   |
| 69 | (cortical adj2 (thick* or thin*)).tw,id.                                                                                                                          | 3719    |
| 70 | ((longterm or long term or permanent or cumulative or chronic or residual) adj2 (consequences or effects or outcome* or sequela* or prognosis or damage*)).tw,id. | 36699   |
| 71 | or/31-70                                                                                                                                                          | 1991111 |
| 72 | 17 and 30 and 71                                                                                                                                                  | 1686    |
| 73 | limit 72 to peer reviewed journal                                                                                                                                 | 1319    |
| 74 | limit 73 to yr="2001 - 2022"                                                                                                                                      | 1265    |

911  
912  
913

### Cochrane Database of Systematic Reviews (via OVID) as searched March 25, 2022

| #  | Searches                                                                                                                                                                                                                                                                                                                                                                                                                                                                                                                                                                                               | Results |
|----|--------------------------------------------------------------------------------------------------------------------------------------------------------------------------------------------------------------------------------------------------------------------------------------------------------------------------------------------------------------------------------------------------------------------------------------------------------------------------------------------------------------------------------------------------------------------------------------------------------|---------|
| 1  | (concussion* or concussed or concussive or subconcuss* or sub-concuss*).ti,ab,ct.                                                                                                                                                                                                                                                                                                                                                                                                                                                                                                                      | 2       |
| 2  | (post-concuss* or postconcuss*).ti,ab,ct.                                                                                                                                                                                                                                                                                                                                                                                                                                                                                                                                                              | 3       |
| 3  | (mild adj3 (traumatic brain injur* or tbi*)).ti,ab,ct.                                                                                                                                                                                                                                                                                                                                                                                                                                                                                                                                                 | 6       |
| 4  | mtbi*.ti,ab,ct.                                                                                                                                                                                                                                                                                                                                                                                                                                                                                                                                                                                        | 1       |
| 5  | (head adj2 (injur* or impact* or trauma*)).ti,ab,ct.                                                                                                                                                                                                                                                                                                                                                                                                                                                                                                                                                   | 19      |
| 6  | (traumatic brain injur* or tbi*).ti,ab,ct.                                                                                                                                                                                                                                                                                                                                                                                                                                                                                                                                                             | 64      |
| 7  | (neurotrauma* or "neuro-trauma*").ti,ab,ct.                                                                                                                                                                                                                                                                                                                                                                                                                                                                                                                                                            | 0       |
| 8  | (craniocerebral adj2 (trauma* or injur*)).ti,ab,ct.                                                                                                                                                                                                                                                                                                                                                                                                                                                                                                                                                    | 0       |
| 9  | ((repetitive or multiple or cumulative) adj3 (head injury* or head impact* or concussion* or head trauma)).ti,ab,ct.                                                                                                                                                                                                                                                                                                                                                                                                                                                                                   | 0       |
| 10 | ((subconcuss* or sub-concuss*) adj3 (impact* or blow*)).ti,ab,ct.                                                                                                                                                                                                                                                                                                                                                                                                                                                                                                                                      | 0       |
| 11 | (chronic traumatic encephalopathy or CTE).ti,ab,ct.                                                                                                                                                                                                                                                                                                                                                                                                                                                                                                                                                    | 0       |
| 12 | (neurodegenerative adj2 (disease* or disorder*)).ti,ab,ct.                                                                                                                                                                                                                                                                                                                                                                                                                                                                                                                                             | 14      |
| 13 | or/1-12                                                                                                                                                                                                                                                                                                                                                                                                                                                                                                                                                                                                | 88      |
| 14 | sport*.ti,ab,ct.                                                                                                                                                                                                                                                                                                                                                                                                                                                                                                                                                                                       | 101     |
| 15 | ((return* or resum* or "re-ent*" or reent*) adj2 (play* or competition* or sport*)).ti,ab,ct.                                                                                                                                                                                                                                                                                                                                                                                                                                                                                                          | 9       |
| 16 | (baseball or basketball or biking or bicycling* or bmx or boxing or "bull rid*" or bullrid* or cheerleading or "cheer leading" or climbing or cricket or diving or equestrian or football or golf or gymnastics or handball or "horse* riding" or hockey or lacrosse or mountaineering or netball or "net ball" or "racquet sport*" or racquetball or ringette or "roller derb*" or rollerskat* or rodeo* or rugby or skateboard* or skating or skiing or snowboard* or "snow sport*" or soccer or softball or squash or swimming or tennis or "track and field" or wrestling or volleyball).ti,ab,ct. | 31      |
| 17 | (archery or badminton or bobsled* or bobsleigh* or canoe* or "cross country" or fencing or kayak* or luge or rifle or rowing or sailing or skeleton or "ski jump*" or sledding or surfing or trampolin* or "water polo" or "weight lifting" or windsurfing or yachting).ti,ab,ct.                                                                                                                                                                                                                                                                                                                      | 9       |
| 18 | (capoeira or "Dim mak" or kenpo or "kung fu" or "pencak silat" or pitfight* or savate or "submission fight*" or UFC or "ultimate fighting champion*").ti,ab,ct.                                                                                                                                                                                                                                                                                                                                                                                                                                        | 0       |

|    |                                                                                                                                                                                                                                                                                                                                                                                      |      |
|----|--------------------------------------------------------------------------------------------------------------------------------------------------------------------------------------------------------------------------------------------------------------------------------------------------------------------------------------------------------------------------------------|------|
| 19 | (biker* or boxer* or "cheer leader*" or cheerleader* or climber* or cyclist* or diver or divers or fencer* or fighter* or footballer* or goalie* or golfer* or gymnast or gymnasts or "horse* rider*" or jockey* or judoka* or mountaineer* or rower* or sailor* or skater* or skier* or sledder* or snowboarder* or surfer* or swimmer* or "weight lifter*" or wrestler*).ti,ab,ct. | 7    |
| 20 | or/14-19                                                                                                                                                                                                                                                                                                                                                                             | 140  |
| 21 | ((cognitive or memory or executive) adj2 (impair* or abnormal* or dysfunction* or deficit* or disorder* or disabilit* or decline or disturbance* or deteriorat* or decrement* or sequela*).ti,ab,ct.                                                                                                                                                                                 | 209  |
| 22 | ((drug* or alcohol* or substance) adj2 (dependen* or abuse or disorder*).ti,ab,ct.                                                                                                                                                                                                                                                                                                   | 83   |
| 23 | ((psychiatric or mental* or psychological) adj2 (illness or impair* or abnormal* or dysfunction* or deficit* or decline or deteriorat*).ti,ab,ct.                                                                                                                                                                                                                                    | 99   |
| 24 | ((neuropsychological or neurophysiological or neuropsychiatric or neurocognitive) adj2 (impair* or abnormal* or dysfunction* or decline or disturbance* or deteriorat*).ti,ab,ct.                                                                                                                                                                                                    | 4    |
| 25 | (depress* or suicide or suicidal or aggression or aggressive or anger or angry or rage or anxiety).ti,ab,ct.                                                                                                                                                                                                                                                                         | 1037 |
| 26 | (mood disorder* or psychos?s).ti,ab,ct.                                                                                                                                                                                                                                                                                                                                              | 158  |
| 27 | ((chronic or persistent) adj2 headache*).ti,ab,ct.                                                                                                                                                                                                                                                                                                                                   | 7    |
| 28 | (chronic traumatic encephalopath* or CTE or traumatic encephalopath*).ti,ab,ct.                                                                                                                                                                                                                                                                                                      | 0    |
| 29 | ((neurodegenerative or neurobehavioral or neurobehavioural) adj2 (disorder* or disease*).ti,ab,ct.                                                                                                                                                                                                                                                                                   | 14   |
| 30 | (dementia pugilistica or punch drunk).ti,ab,ct.                                                                                                                                                                                                                                                                                                                                      | 0    |
| 31 | (alzheimer* or amyotrophic lateral sclerosis or ALS or parkinson*).ti,ab,ct.                                                                                                                                                                                                                                                                                                         | 234  |
| 32 | (motor neuron adj1 (disease* or disorder*).ti,ab,ct.                                                                                                                                                                                                                                                                                                                                 | 28   |
| 33 | hypopituitarism.ti,ab,ct.                                                                                                                                                                                                                                                                                                                                                            | 0    |
| 34 | ((endocrine or hormon* or metabolic) adj2 dysfunction).ti,ab,ct.                                                                                                                                                                                                                                                                                                                     | 5    |
| 35 | seizure*.ti,ab,ct.                                                                                                                                                                                                                                                                                                                                                                   | 220  |
| 36 | (white matter or taupath* or tau or tap-43 or septum pellucid*).ti,ab,ct.                                                                                                                                                                                                                                                                                                            | 88   |
| 37 | (cortical adj2 (thick* or thin*).ti,ab,ct.                                                                                                                                                                                                                                                                                                                                           | 1    |
| 38 | ((longterm or long term or permanent or cumulative or chronic or residual) adj2 (consequences or effects or outcome* or sequela* or prognosis or damage*).ti,ab,ct.                                                                                                                                                                                                                  | 729  |
| 39 | or/21-38                                                                                                                                                                                                                                                                                                                                                                             | 2335 |
| 40 | 13 and 20 and 39                                                                                                                                                                                                                                                                                                                                                                     | 1    |

914  
915

## 916 CINAHL Plus With Full Text (via Ebsco) as searched March 25, 2022

917

| #  | Query                                                                                                                                                                                                                                                                                                                                                                                                                                                                                                                                                                                                                                                                                                                                                                                                                                                                                                                                                                                                                                                                                                                                                                                                                                                                                               | Limiters/Expanders                      | Results |
|----|-----------------------------------------------------------------------------------------------------------------------------------------------------------------------------------------------------------------------------------------------------------------------------------------------------------------------------------------------------------------------------------------------------------------------------------------------------------------------------------------------------------------------------------------------------------------------------------------------------------------------------------------------------------------------------------------------------------------------------------------------------------------------------------------------------------------------------------------------------------------------------------------------------------------------------------------------------------------------------------------------------------------------------------------------------------------------------------------------------------------------------------------------------------------------------------------------------------------------------------------------------------------------------------------------------|-----------------------------------------|---------|
| S1 | (MH "Sports") OR (MH "Horseback Riding") OR (MH "Animal Sports") OR (MH "Amateur Sports") OR (MH "Aquatic Sports") OR (MH "Diving") OR (MH "Rowing") OR (MH "Swimming") OR (MH "Athletic Performance") OR (MH "Athletic Training") OR (MH "Athletic Training Programs") OR (MH "Sport Specific Training") OR (MH "Body Building") OR (MH "College Sports") OR (MH "Contact Sports") OR (MH "Boxing") OR (MH "Football") OR (MH "Martial Arts") OR (MH "Rugby") OR (MH "Wrestling") OR (MH "Cycling") OR (MH "Endurance Sports") OR (MH "Extreme Sports") OR (MH "Fencing") OR (MH "Golf") OR (MH "Gymnastics") OR (MH "Handball") OR (MH "Mountaineering") OR (MH "Professional Sports") OR (MH "Racquet Sports") OR (MH "Tennis") OR (MH "Rock Climbing") OR (MH "Skating") OR (MH "Ice Skating") OR (MH "Skateboarding") OR (MH "Skiing") OR (MH "Snow Skiing") OR (MH "Sporting Events") OR (MH "Sports, Disabled") OR (MH "Sports Participation") OR (MH "Target Sports") OR (MH "Archery") OR (MH "Baseball") OR (MH "Team Sports") OR (MH "Basketball") OR (MH "Cricket (Sports)") OR (MH "Hockey") OR (MH "Soccer") OR (MH "Softball") OR (MH "Volleyball") OR (MH "Track and Field") OR (MH "Weight Lifting") OR (MH "Winter Sports") OR (MH "Snowboarding") OR (MH "Cross Country Skiing") | Search modes - Find all my search terms | 74,606  |
| S2 | (MH "Athletic Injuries") OR (MH "Aquatic Sports Injuries") OR (MH "Skiing Injuries") OR (MH "Swimming Injuries") OR (MH "Baseball Injuries") OR (MH "Basketball Injuries") OR (MH "Boxing Injuries") OR (MH "Cricket Injuries") OR (MH "Cycling Injuries") OR (MH "Fencing Injuries") OR (MH "Football Injuries") OR (MH "Golf Injuries") OR (MH "Gymnastics Injuries") OR (MH "Hockey Injuries") OR (MH "Martial Arts Injuries") OR (MH "Mountaineering Injuries") OR (MH "Racquet Sports Injuries") OR (MH "Tennis Injuries") OR (MH "Rock Climbing Injuries") OR (MH "Rugby Injuries") OR (MH "Skateboarding Injuries") OR (MH "Soccer Injuries") OR (MH "Volleyball Injuries") OR (MH "Winter Sports Injuries") OR (MH "Snowboarding Injuries")                                                                                                                                                                                                                                                                                                                                                                                                                                                                                                                                                 | Search modes - Find all my search terms | 23,090  |
| S3 | (MH "Sports Re-Entry") OR (MH "Sports Medicine")                                                                                                                                                                                                                                                                                                                                                                                                                                                                                                                                                                                                                                                                                                                                                                                                                                                                                                                                                                                                                                                                                                                                                                                                                                                    | Search modes - Find all my search terms | 9,111   |
| S4 | (MH "Athletes+")                                                                                                                                                                                                                                                                                                                                                                                                                                                                                                                                                                                                                                                                                                                                                                                                                                                                                                                                                                                                                                                                                                                                                                                                                                                                                    | Search modes - Find all my search terms | 31,956  |
| S5 | TI sport* OR AB sport* OR SO sport* OR SU sport*                                                                                                                                                                                                                                                                                                                                                                                                                                                                                                                                                                                                                                                                                                                                                                                                                                                                                                                                                                                                                                                                                                                                                                                                                                                    | Search modes - Find all my search terms | 142,592 |

|     |                                                                                                                                                                                                                                                                                                                                                                                                                                                                                                                                                                                                                                                                                                                                                                                                                                                                                                                                                                                                                                                                                                                                                                                                            |                                         |        |
|-----|------------------------------------------------------------------------------------------------------------------------------------------------------------------------------------------------------------------------------------------------------------------------------------------------------------------------------------------------------------------------------------------------------------------------------------------------------------------------------------------------------------------------------------------------------------------------------------------------------------------------------------------------------------------------------------------------------------------------------------------------------------------------------------------------------------------------------------------------------------------------------------------------------------------------------------------------------------------------------------------------------------------------------------------------------------------------------------------------------------------------------------------------------------------------------------------------------------|-----------------------------------------|--------|
| S6  | TI ( ((return* or resum* or "re-ent*" or reent*) N2 (play* or competition* or sport*)) ) OR AB ( ((return* or resum* or "re-ent*" or reent*) N2 (play* or competition* or sport*)) )                                                                                                                                                                                                                                                                                                                                                                                                                                                                                                                                                                                                                                                                                                                                                                                                                                                                                                                                                                                                                       | Search modes - Find all my search terms | 5,444  |
| S7  | TI ( (baseball or basketball or biking or bicycling* or bmx or boxing or bullrid* or "bull rid*" or cheerleading or "cheer leading" or climbing or cricket or diving or equestrian or football or golf or gymnastics or handball or "horse* riding" or hockey or lacrosse or mountaineering or netball or "net ball" or "racquet sport*" or racquetball or ringette or rodeo* or "roller derb*" or rollerskat* or rugby or skateboard* or skating or skiing or snowboard* or "snow sport*" or soccer or softball or squash or swimming or tennis or "track and field" or wrestling or volleyball) ) OR AB ( (baseball or basketball or biking or bicycling* or bmx or boxing or bullrid* or "bull rid*" or cheerleading or "cheer leading" or climbing or cricket or diving or equestrian or football or golf or gymnastics or handball or "horse* riding" or hockey or lacrosse or mountaineering or netball or "net ball" or "racquet sport*" or racquetball or ringette or rodeo* or "roller derb*" or rollerskat* or rugby or skateboard* or skating or skiing or snowboard* or "snow sport*" or soccer or softball or squash or swimming or tennis or "track and field" or wrestling or volleyball) ) | Search modes - Find all my search terms | 40,199 |
| S8  | TI ( (archery or badminton or bobsled* or bobsleigh* or canoe* or "cross country" or fencing or kayak* or luge or rifle or rowing or sailing or skeleton or "ski jump*" or sledding or surfing or trampolin* or "water polo" or "weight lifting" or windsurfing or yachting) ) OR AB ( (archery or badminton or bobsled* or bobsleigh* or canoe* or "cross country" or fencing or kayak* or luge or rifle or rowing or sailing or skeleton or "ski jump*" or sledding or surfing or trampolin* or "water polo" or "weight lifting" or windsurfing or yachting) )                                                                                                                                                                                                                                                                                                                                                                                                                                                                                                                                                                                                                                           | Search modes - Find all my search terms | 9,370  |
| S9  | TI ( (aikido or judo or jiu-jitsu or "jiu-jitsu" or jujitsu or "ju jitsu" or karate or kickbox* or "Martial art*" or taekwondo or "tae kwon do" or "tai ji") ) OR AB ( (aikido or judo or jiu-jitsu or "jiu-jitsu" or jujitsu or "ju jitsu" or karate or kickbox* or "Martial art*" or taekwondo or "tae kwon do" or "tai ji") )                                                                                                                                                                                                                                                                                                                                                                                                                                                                                                                                                                                                                                                                                                                                                                                                                                                                           | Search modes - Find all my search terms | 1,638  |
| S10 | TI ( (capoeira or "Dim mak" or kenpo or "kung fu" or "pencak silat" or pitfight* or savate or "submission fight*" or UFC or "ultimate fighting champion*") ) OR AB ( (capoeira or "Dim mak" or kenpo or "kung fu" or "pencak silat" or pitfight* or savate or "submission fight*" or UFC or "ultimate fighting champion*") )                                                                                                                                                                                                                                                                                                                                                                                                                                                                                                                                                                                                                                                                                                                                                                                                                                                                               | Search modes - Find all my search terms | 192    |
| S11 | TI ( (athlete* or athletic* or crew or player* or teammate* or "team-mate*" or varsity or biker* or boxer* or "cheer leader*" or cheerleader* or climber* or cyclist* or diver or                                                                                                                                                                                                                                                                                                                                                                                                                                                                                                                                                                                                                                                                                                                                                                                                                                                                                                                                                                                                                          | Search modes - Find all my search terms | 71,458 |

|     |                                                                                                                                                                                                                                                                                                                                                                                                                                                                                                                                                                                                                                                                                                                                                           |                                         |         |
|-----|-----------------------------------------------------------------------------------------------------------------------------------------------------------------------------------------------------------------------------------------------------------------------------------------------------------------------------------------------------------------------------------------------------------------------------------------------------------------------------------------------------------------------------------------------------------------------------------------------------------------------------------------------------------------------------------------------------------------------------------------------------------|-----------------------------------------|---------|
|     | divers or fencer* or fighter* or footballer* or goalie* or golfer* or gymnast or gymnasts or "horse* rider*" or jockey* or judoka* or mountaineer* or rower* or sailor* or skater* or skier* or sledder* or snowboarder* or surfer* or swimmer* or "weight lifter*" or wrestler* ) OR AB ( athlete* or athletic* or crew or player* or teammate* or "team-mate*" or varsity or biker* or boxer* or "cheer leader*" or cheerleader* or climber* or cyclist* or diver or divers or fencer* or fighter* or footballer* or goalie* or golfer* or gymnast or gymnasts or "horse* rider*" or jockey* or judoka* or mountaineer* or rower* or sailor* or skater* or skier* or sledder* or snowboarder* or surfer* or swimmer* or "weight lifter*" or wrestler* ) |                                         |         |
| S12 | S1 OR S2 OR S3 OR S4 OR S5 OR S6 OR S7 OR S8 OR S9 OR S10 OR S11                                                                                                                                                                                                                                                                                                                                                                                                                                                                                                                                                                                                                                                                                          | Search modes - Find all my search terms | 206,135 |
| S13 | (MH "BRAIN concussion") OR (MH "POSTCONCUSSION syndrome") OR (MH "BRAIN injuries")                                                                                                                                                                                                                                                                                                                                                                                                                                                                                                                                                                                                                                                                        | Search modes - Find all my search terms | 31,272  |
| S14 | TI ( (concussion* or concussed or concussive or subconcuss* or "sub-concuss*") ) OR AB ( (concussion* or concussed or concussive or subconcuss* or "sub-concuss*") )                                                                                                                                                                                                                                                                                                                                                                                                                                                                                                                                                                                      | Search modes - Find all my search terms | 6,195   |
| S15 | TI ( ("post-concuss*" or postconcuss* ) OR AB ( ("post-concuss*" or postconcuss* )                                                                                                                                                                                                                                                                                                                                                                                                                                                                                                                                                                                                                                                                        | Search modes - Find all my search terms | 1,665   |
| S16 | TI ( (mild N3 ("traumatic brain injur*" or tbi*)) ) OR AB ( (mild N3 ("traumatic brain injur*" or tbi*)) )                                                                                                                                                                                                                                                                                                                                                                                                                                                                                                                                                                                                                                                | Search modes - Find all my search terms | 3,334   |
| S17 | TI mtbi* OR AB mtbi*                                                                                                                                                                                                                                                                                                                                                                                                                                                                                                                                                                                                                                                                                                                                      | Search modes - Find all my search terms | 1,294   |
| S18 | TI ( (head N2 (injur* or impact* or trauma*)) ) OR AB ( (head N2 (injur* or impact* or trauma*)) )                                                                                                                                                                                                                                                                                                                                                                                                                                                                                                                                                                                                                                                        | Search modes - Find all my search terms | 11,498  |
| S19 | TI ( ("traumatic brain injur*" or tbi*) ) OR AB ( ("traumatic brain injur*" or tbi*) )                                                                                                                                                                                                                                                                                                                                                                                                                                                                                                                                                                                                                                                                    | Search modes - Find all my search terms | 19,512  |
| S20 | TI ( (neurotrauma* or "neuro-trauma*") OR (craniocerebral N2 (trauma* OR injur*)) ) OR AB ( (neurotrauma* or "neuro-trauma*") OR (craniocerebral N2 (trauma* OR injur*)) )                                                                                                                                                                                                                                                                                                                                                                                                                                                                                                                                                                                | Search modes - Find all my search terms | 679     |
| S21 | (MH "Chronic Traumatic Encephalopathy")                                                                                                                                                                                                                                                                                                                                                                                                                                                                                                                                                                                                                                                                                                                   | Search modes - Find all my search terms | 65      |
| S22 | (MH "Neurodegenerative Diseases")                                                                                                                                                                                                                                                                                                                                                                                                                                                                                                                                                                                                                                                                                                                         | Search modes - Find all my search terms | 4,887   |
| S23 | TI ( ((subconcuss* or sub-concuss*) N3 (impact* or blow*)) ) OR AB ( ((subconcuss* or sub-concuss*) N3 (impact* or blow*)) )                                                                                                                                                                                                                                                                                                                                                                                                                                                                                                                                                                                                                              | Search modes - Find all my search terms | 94      |
| S24 | TI ( ((repetitive or multiple or cumulative) N3 ("head injur*" or "head impact*" or concussion* or "head trauma*)) ) OR AB ( ((repetitive or multiple or cumulative) N3 ("head                                                                                                                                                                                                                                                                                                                                                                                                                                                                                                                                                                            | Search modes - Find all my search terms | 370     |

|     |                                                                                                                                                                                                                                                                                                                                                                                                      |                                         |         |
|-----|------------------------------------------------------------------------------------------------------------------------------------------------------------------------------------------------------------------------------------------------------------------------------------------------------------------------------------------------------------------------------------------------------|-----------------------------------------|---------|
|     | injur*" or "head impact*" or concussion* or "head trauma") )                                                                                                                                                                                                                                                                                                                                         |                                         |         |
| S25 | TI ( ("chronic traumatic encephalopath*" or CTE) ) OR AB ( ("chronic traumatic encephalopath*" or CTE) )                                                                                                                                                                                                                                                                                             | Search modes - Find all my search terms | 440     |
| S26 | TI ( (neurodegenerative N2 (disease* or disorder*)) ) OR AB ( (neurodegenerative N2 (disease* or disorder*)) )                                                                                                                                                                                                                                                                                       | Search modes - Find all my search terms | 8,986   |
| S27 | S13 OR S14 OR S15 OR S16 OR S17 OR S18 OR S19 OR S20 OR S21 OR S22 OR S23 OR S24 OR S25 OR S26                                                                                                                                                                                                                                                                                                       | Search modes - Find all my search terms | 58,285  |
| S28 | S12 AND S27                                                                                                                                                                                                                                                                                                                                                                                          | Search modes - Find all my search terms | 6,939   |
| S29 | (MH "Cognition Disorders")                                                                                                                                                                                                                                                                                                                                                                           | Search modes - Find all my search terms | 32,546  |
| S30 | (MH "Mental Disorders")                                                                                                                                                                                                                                                                                                                                                                              | Search modes - Find all my search terms | 64,240  |
| S31 | (MH "Substance Use Disorders") or (MH "Substance Abuse") OR (MH "Alcohol-Related Disorders") OR (MH "Alcohol Abuse") OR (MH "Alcoholism")                                                                                                                                                                                                                                                            | Search modes - Find all my search terms | 100,979 |
| S32 | TI ( ((cognitive or memory or executive) N2 (impair* or abnormal* or dysfunction* or deficit* or disorder* or disabilit* or decline or disturbance* or deteriorat* or decrement* or sequela*)) ) OR AB ( ((cognitive or memory or executive) N2 (impair* or abnormal* or dysfunction* or deficit* or disorder* or disabilit* or decline or disturbance* or deteriorat* or decrement* or sequela*)) ) | Search modes - Find all my search terms | 58,749  |
| S33 | TI ( ((drug* or alcohol* or substance) N2 (dependen* or abuse or disorder*)) ) OR AB ( ((drug* or alcohol* or substance) N2 (dependen* or abuse or disorder*)) )                                                                                                                                                                                                                                     | Search modes - Find all my search terms | 50,576  |
| S34 | (MH "Psychotic Disorders+")                                                                                                                                                                                                                                                                                                                                                                          | Search modes - Find all my search terms | 137,948 |
| S35 | (MH "Depression")                                                                                                                                                                                                                                                                                                                                                                                    | Search modes - Find all my search terms | 121,097 |
| S36 | (MH "Self-Injurious Behavior")                                                                                                                                                                                                                                                                                                                                                                       | Search modes - Find all my search terms | 4,723   |
| S37 | (MH "Suicide") OR (MH "Suicide, Attempted")                                                                                                                                                                                                                                                                                                                                                          | Search modes - Find all my search terms | 26,967  |
| S38 | (MH "Aggression")                                                                                                                                                                                                                                                                                                                                                                                    | Search modes - Find all my search terms | 11,938  |
| S39 | (MH "Anxiety") or (MH "Anxiety Disorders") OR (MH "Generalized Anxiety Disorder")                                                                                                                                                                                                                                                                                                                    | Search modes - Find all my search terms | 62,774  |
| S40 | (MH "Anger")                                                                                                                                                                                                                                                                                                                                                                                         | Search modes - Find all my search terms | 6,109   |
| S41 | (MH "Affective Disorders")                                                                                                                                                                                                                                                                                                                                                                           | Search modes - Find all my search terms | 8,167   |

|     |                                                                                                                                                                                                                                                                                                                                                                |                                         |         |
|-----|----------------------------------------------------------------------------------------------------------------------------------------------------------------------------------------------------------------------------------------------------------------------------------------------------------------------------------------------------------------|-----------------------------------------|---------|
| S42 | TI ( ((psychiatric or mental* or psychological) N2 (illness or impair* or abnormal* or dysfunction* or deficit* or decline or deteriorat*)) ) OR AB ( ((psychiatric or mental* or psychological) N2 (illness or impair* or abnormal* or dysfunction* or deficit* or decline or deteriorat*)) )                                                                 | Search modes - Find all my search terms | 31,135  |
| S43 | TI ( ((neuropsychological or neurophysiological or neuropsychiatric or neurocognitive) N2 (impair* or abnormal* or dysfunction* or decline or disturbance* or deteriorat*)) ) OR AB ( ((neuropsychological or neurophysiological or neuropsychiatric or neurocognitive) N2 (impair* or abnormal* or dysfunction* or decline or disturbance* or deteriorat*)) ) | Search modes - Find all my search terms | 2,995   |
| S44 | TI ( (depress* or suicide or suicidal or aggression or aggressive or anger or angry or rage or anxiety) ) OR AB ( (depress* or suicide or suicidal or aggression or aggressive or anger or angry or rage or anxiety) )                                                                                                                                         | Search modes - Find all my search terms | 290,709 |
| S45 | TI ( (“mood disorder*” or psychos?s) ) OR AB ( (“mood disorder*” or psychos?s) )                                                                                                                                                                                                                                                                               | Search modes - Find all my search terms | 20,010  |
| S46 | TI ( ((chronic or persistent) N2 headache*) ) OR AB ( ((chronic or persistent) N2 headache*) )                                                                                                                                                                                                                                                                 | Search modes - Find all my search terms | 2,585   |
| S47 | (MH "Neurodegenerative Diseases")                                                                                                                                                                                                                                                                                                                              | Search modes - Find all my search terms | 4,887   |
| S48 | (MH "Chronic Traumatic Encephalopathy")                                                                                                                                                                                                                                                                                                                        | Search modes - Find all my search terms | 65      |
| S49 | (MH "Dementia+")                                                                                                                                                                                                                                                                                                                                               | Search modes - Find all my search terms | 80,699  |
| S50 | (MH "Alzheimer's Disease")                                                                                                                                                                                                                                                                                                                                     | Search modes - Find all my search terms | 35,802  |
| S51 | (MH "Amyotrophic Lateral Sclerosis")                                                                                                                                                                                                                                                                                                                           | Search modes - Find all my search terms | 4,492   |
| S52 | (MH "Motor Neuron Diseases")                                                                                                                                                                                                                                                                                                                                   | Search modes - Find all my search terms | 1,438   |
| S53 | (MH "Parkinson Disease")                                                                                                                                                                                                                                                                                                                                       | Search modes - Find all my search terms | 24,503  |
| S54 | (MH "Hypopituitarism")                                                                                                                                                                                                                                                                                                                                         | Search modes - Find all my search terms | 619     |
| S55 | (MH "Seizures")                                                                                                                                                                                                                                                                                                                                                | Search modes - Find all my search terms | 11,869  |
| S56 | TI ( (“chronic traumatic encephalopath*” or CTE or “traumatic encephalopath*” ) OR AB ( (“chronic traumatic encephalopath*” or CTE or “traumatic encephalopath*” )                                                                                                                                                                                             | Search modes - Find all my search terms | 464     |
| S57 | TI ( ((neurodegenerative or neurobehavioral or neurobehavioural) N2 (disorder* or disease*)) ) OR AB ( ((neurodegenerative or neurobehavioral or neurobehavioural) N2 (disorder* or disease*)) )                                                                                                                                                               | Search modes - Find all my search terms | 9,211   |

|     |                                                                                                                                                                                                                                                                                                                                        |                                                                                          |         |
|-----|----------------------------------------------------------------------------------------------------------------------------------------------------------------------------------------------------------------------------------------------------------------------------------------------------------------------------------------|------------------------------------------------------------------------------------------|---------|
| S58 | TI ( (“dementia pugilistica” or “punch drunk”) ) OR AB ( (“dementia pugilistica” or “punch drunk”) )                                                                                                                                                                                                                                   | Search modes - Find all my search terms                                                  | 20      |
| S59 | TI ( (alzheimer* or “amyotrophic lateral sclerosis” or ALS or parkinson*) ) OR AB ( (alzheimer* or “amyotrophic lateral sclerosis” or ALS or parkinson*) )                                                                                                                                                                             | Search modes - Find all my search terms                                                  | 77,933  |
| S60 | TI ( (“motor neuron” N1 (disease* or disorder*)) ) OR AB ( (“motor neuron” N1 (disease* or disorder*)) )                                                                                                                                                                                                                               | Search modes - Find all my search terms                                                  | 907     |
| S61 | TI hypopituitarism OR AB hypopituitarism                                                                                                                                                                                                                                                                                               | Search modes - Find all my search terms                                                  | 523     |
| S62 | TI ( ((endocrine or hormon* or metabolic) N2 dysfunction) ) OR AB ( ((endocrine or hormon* or metabolic) N2 dysfunction) )                                                                                                                                                                                                             | Search modes - Find all my search terms                                                  | 1,634   |
| S63 | TI seizure* OR AB seizure*                                                                                                                                                                                                                                                                                                             | Search modes - Find all my search terms                                                  | 22,270  |
| S64 | (MH "White Matter")                                                                                                                                                                                                                                                                                                                    | Search modes - Find all my search terms                                                  | 566     |
| S65 | (MM "Cerebral Cortex")                                                                                                                                                                                                                                                                                                                 | Search modes - Find all my search terms                                                  | 5,377   |
| S66 | TI ( (“white matter” or taupath* or tau or “tap-43” or “septum pellucid**”) ) OR AB ( (“white matter” or taupath* or tau or “tap-43” or “septum pellucid**”) )                                                                                                                                                                         | Search modes - Find all my search terms                                                  | 18,367  |
| S67 | TI ( (cortical N2 (thick* or thin*)) ) OR AB ( (cortical N2 (thick* or thin*)) )                                                                                                                                                                                                                                                       | Search modes - Find all my search terms                                                  | 2,387   |
| S68 | TI ( ((longterm or “long term” or permanent or cumulative or chronic or residual) N2 (consequences or effects or outcome* or sequela* or prognosis or damage*)) ) OR AB ( ((longterm or “long term” or permanent or cumulative or chronic or residual) N2 (consequences or effects or outcome* or sequela* or prognosis or damage*)) ) | Search modes - Find all my search terms                                                  | 64,164  |
| S69 | S29 OR S30 OR S31 OR S32 OR S33 OR S34 OR S35 OR S36 OR S37 OR S38 OR S39 OR S40 OR S41 OR S42 OR S43 OR S44 OR S45 OR S46 OR S47 OR S48 OR S49 OR S50 OR S51 OR S52 OR S53 OR S54 OR S55 OR S56 OR S57 OR S58 OR S59 OR S60 OR S61 OR S62 OR S63 OR S64 OR S65 OR S66 OR S67 OR S68                                                   | Search modes - Find all my search terms                                                  | 795,018 |
| S70 | S28 AND S69                                                                                                                                                                                                                                                                                                                            | Search modes - Find all my search terms                                                  | 1,451   |
| S71 | S28 AND S69                                                                                                                                                                                                                                                                                                                            | Limiters - Scholarly (Peer Reviewed) Journals<br>Search modes - Find all my search terms | 1,277   |
| S72 | S28 AND S69                                                                                                                                                                                                                                                                                                                            | Limiters - Published Date: 20010101-20221231;<br>Scholarly (Peer Reviewed) Journals      | 1,241   |



|     |             |                                                                                                                                                              |       |
|-----|-------------|--------------------------------------------------------------------------------------------------------------------------------------------------------------|-------|
|     |             | Search modes - Find all my search terms                                                                                                                      |       |
| S73 | S28 AND S69 | Limiters - Published Date: 20010101-20221231; Scholarly (Peer Reviewed) Journals<br>Search modes - Find all my search terms                                  | 1,241 |
| S74 | S28 AND S69 | Limiters - Published Date: 20010101-20221231; Scholarly (Peer Reviewed) Journals<br>Narrow by Language: - english<br>Search modes - Find all my search terms | 1,234 |

918  
919  
920

**SportDiscus with Full Text (via Ebsco) as searched March 25, 2022**

| #   | Query                                                                                                                                                                                                                                                    | Limiters/Expanders                      | Results |
|-----|----------------------------------------------------------------------------------------------------------------------------------------------------------------------------------------------------------------------------------------------------------|-----------------------------------------|---------|
| S1  | (DE "BRAIN concussion" OR DE "POSTCONCUSSION syndrome") OR (DE "BRAIN injuries")                                                                                                                                                                         | Search modes - Find all my search terms | 6,067   |
| S2  | DE "BRAIN concussion prevention"                                                                                                                                                                                                                         | Search modes - Find all my search terms | 185     |
| S3  | DE "BRAIN concussion diagnosis"                                                                                                                                                                                                                          | Search modes - Find all my search terms | 385     |
| S4  | DE "CHRONIC traumatic encephalopathy"                                                                                                                                                                                                                    | Search modes - Find all my search terms | 110     |
| S5  | DE "DEGENERATION (Pathology)"                                                                                                                                                                                                                            | Search modes - Find all my search terms | 453     |
| S6  | TI ( (concussion* or concussed or concussive or subconcuss* or "sub-concuss*") ) OR AB ( (concussion* or concussed or concussive or subconcuss* or "sub-concuss*") ) OR KW ( (concussion* or concussed or concussive or subconcuss* or "sub-concuss*") ) | Search modes - Find all my search terms | 5,595   |
| S7  | TI ( ("post-concuss*" or postconcuss* ) OR AB ( ("post-concuss*" or postconcuss* ) OR KW ( ("post-concuss*" or postconcuss* ) )                                                                                                                          | Search modes - Find all my search terms | 907     |
| S8  | TI ( (mild N3 ("traumatic brain injur*" or tbi*)) ) OR AB ( (mild N3 ("traumatic brain injur*" or tbi*)) ) OR KW ( (mild N3 ("traumatic brain injur*" or tbi*)) )                                                                                        | Search modes - Find all my search terms | 1,285   |
| S9  | TI mtbi* OR AB mtbi* OR KW mtbi*                                                                                                                                                                                                                         | Search modes - Find all my search terms | 394     |
| S10 | TI ( (head N2 (injur* or impact* or trauma*)) ) OR AB ( (head N2 (injur* or impact* or trauma*)) ) OR KW ( (head N2 (injur* or impact* or trauma*)) )                                                                                                    | Search modes - Find all my search terms | 3,729   |

|     |                                                                                                                                                                                                                                                                                                                                                                                                                                                                                                                                   |                                         |         |
|-----|-----------------------------------------------------------------------------------------------------------------------------------------------------------------------------------------------------------------------------------------------------------------------------------------------------------------------------------------------------------------------------------------------------------------------------------------------------------------------------------------------------------------------------------|-----------------------------------------|---------|
| S11 | TI ( ("traumatic brain injur*" or tbi*) ) OR AB ( ("traumatic brain injur*" or tbi*) ) OR KW ( ("traumatic brain injur*" or tbi*) )                                                                                                                                                                                                                                                                                                                                                                                               | Search modes - Find all my search terms | 5,268   |
| S12 | TI ( (neurotrauma* or "neuro-trauma*") OR (craniocerebral N2 (trauma* OR injur* ) ) OR AB ( (neurotrauma* or "neuro-trauma*") OR (craniocerebral N2 (trauma* OR injur* ) ) OR KW ( (neurotrauma* or "neuro-trauma*") OR (craniocerebral N2 (trauma* OR injur* ) ) )                                                                                                                                                                                                                                                               | Search modes - Find all my search terms | 178     |
| S13 | TI ( ((subconcuss* or sub-concuss*) N3 (impact* or blow*)) ) OR AB ( ((subconcuss* or sub-concuss*) N3 (impact* or blow*)) ) OR KW ( ((subconcuss* or sub-concuss*) N3 (impact* or blow*)) )                                                                                                                                                                                                                                                                                                                                      | Search modes - Find all my search terms | 70      |
| S14 | TI ( ((repetitive or multiple or cumulative) N3 ("head injur*" or "head impact*" or concussion* or "head trauma")) ) OR AB ( ((repetitive or multiple or cumulative) N3 ("head injur*" or "head impact*" or concussion* or "head trauma")) ) OR KW ( ((repetitive or multiple or cumulative) N3 ("head injur*" or "head impact*" or concussion* or "head trauma")) )                                                                                                                                                              | Search modes - Find all my search terms | 214     |
| S15 | TI ( ("chronic traumatic encephalopath*" or CTE) ) OR AB ( ("chronic traumatic encephalopath*" or CTE) ) OR KW ( ("chronic traumatic encephalopath*" or CTE) )                                                                                                                                                                                                                                                                                                                                                                    | Search modes - Find all my search terms | 189     |
| S16 | TI ( (neurodegenerative N2 (disease* or disorder*)) ) OR AB ( (neurodegenerative N2 (disease* or disorder*)) ) OR KW ( (neurodegenerative N2 (disease* or disorder*)) )                                                                                                                                                                                                                                                                                                                                                           | Search modes - Find all my search terms | 737     |
| S17 | S1 OR S2 OR S3 OR S4 OR S5 OR S6 OR S7 OR S8 OR S9 OR S10 OR S11 OR S12 OR S13 OR S14 OR S15 OR S16                                                                                                                                                                                                                                                                                                                                                                                                                               | Search modes - Find all my search terms | 14,596  |
| S18 | DE "SPORTS" OR DE "AMATEUR sports" OR DE "AQUATIC sports" OR DE "BALL games" OR DE "COLLEGE sports" OR DE "CONTACT sports" OR DE "ENDURANCE sports" OR DE "EXTREME sports" OR DE "INDIVIDUAL sports" OR DE "MILITARY sports" OR DE "OLYMPIC Games" OR DE "PROFESSIONAL sports" OR DE "RECREATIONAL sports" OR DE "SCHOOL sports" OR DE "SPORTS competitions" OR DE "TEAM sports" OR DE "VIOLENCE in sports" OR DE "WINTER sports" OR DE "SPORTS camps" OR DE "SPORTS events" OR DE "SPORTS medicine" OR DE "SPORTS participation" | Search modes - Find all my search terms | 218,565 |
| S19 | DE "ATHLETICS" OR DE "BASEBALL" OR DE "BASKETBALL" OR DE "BICYCLE motocross" OR DE "BICYCLE racing" OR DE "BICYCLE racing training" OR DE "BOXING" OR DE "CYCLING" OR DE "CHEERLEADING" OR DE "ROCK climbing" OR DE "CRACK climbing" OR DE "FACE climbing" OR DE "FREE climbing" OR DE "INDOOR rock climbing" OR                                                                                                                                                                                                                  | Search modes - Find all my search terms | 414,453 |

|                                                                                                                                                                                                                                                                                                                                                                                                                                                                                                                                                                                                                                                                                                                                                                                                                                                                                                                                                                                                                                                                                                                                                                                                                                                                                                                                                                                                                                                                                                                                                                                                                                                                                                                                                                                                                                                                                                                                                                                                                                                                                                                                                                                                                                                                                                          |  |  |
|----------------------------------------------------------------------------------------------------------------------------------------------------------------------------------------------------------------------------------------------------------------------------------------------------------------------------------------------------------------------------------------------------------------------------------------------------------------------------------------------------------------------------------------------------------------------------------------------------------------------------------------------------------------------------------------------------------------------------------------------------------------------------------------------------------------------------------------------------------------------------------------------------------------------------------------------------------------------------------------------------------------------------------------------------------------------------------------------------------------------------------------------------------------------------------------------------------------------------------------------------------------------------------------------------------------------------------------------------------------------------------------------------------------------------------------------------------------------------------------------------------------------------------------------------------------------------------------------------------------------------------------------------------------------------------------------------------------------------------------------------------------------------------------------------------------------------------------------------------------------------------------------------------------------------------------------------------------------------------------------------------------------------------------------------------------------------------------------------------------------------------------------------------------------------------------------------------------------------------------------------------------------------------------------------------|--|--|
| <p>DE "CRICKET (Sport)" OR DE "CRICKET competitions" OR DE "INDOOR cricket" OR DE "TWENTY20 cricket" OR DE "ACROBATIC diving" OR DE "SPRINGBOARD diving" OR DE "HORSE sports" OR DE "EQUESTRIAN accidents" OR DE "DRESSAGE tests" OR DE "EVENTING (Horsemanship)" OR DE "GAMES on horseback" OR DE "HORSE racing" OR DE "SHOW jumping" OR DE "SHOW riding" OR DE "VAULTING (Horsemanship)" OR DE "FOOTBALL" OR DE "CANADIAN football" OR DE "COLLEGE football" OR DE "HIGH school football" OR DE "MINOR league football" OR DE "PROFESSIONAL football" OR DE "ARENA football" OR DE "RUGBY football" OR DE "COLLEGE rugby football" OR DE "FLORENTINE football" OR DE "PROFESSIONAL rugby football" OR DE "RUGBY League football" OR DE "RUGBY Union football" OR DE "RUGBY competitions" OR DE "SEVEN-a-side rugby football" OR DE "AUSTRALIAN football" OR DE "TACKLING (Rugby)" OR DE "GOLF" OR DE "COLLEGE golf" OR DE "PROFESSIONAL golf" OR DE "SNOW golf" OR DE "GYMNASTICS" OR DE "ARTISTIC gymnastics" OR DE "SWEDISH gymnastics" OR DE "TEAM aerobics" OR DE "TUMBLING" OR DE "HANDBALL" OR DE "TEAM handball" OR DE "HOCKEY" OR DE "COLLEGE hockey" OR DE "FIELD hockey" OR DE "INDOOR hockey" OR DE "LAWN hockey" OR DE "MINOR league hockey" OR DE "ROLLER hockey" OR DE "BALL hockey" OR DE "PROFESSIONAL hockey" OR DE "LACROSSE" OR DE "MOUNTAINEERING" OR DE "NETBALL" OR DE "RACKET games" OR DE "RACQUETBALL" OR DE "RINGETTE (Game)" OR DE "RODEOS" OR DE "BRONC riding" OR DE "BULL riding" OR DE "CALF roping" OR DE "CHUCKWAGON racing" OR DE "STEER roping" OR DE "STEER wrestling" OR DE "TEAM penning" OR DE "TEAM roping" OR DE "TRICK roping" OR DE "SKATEBOARDING" OR DE "SNOW skating" OR DE "SKATING" OR DE "FIGURE skating" OR DE "FREE skating" OR DE "ICE dancing" OR DE "PROFESSIONAL skating" OR DE "SPEED skating" OR DE "ROLLER skating" OR DE "SKI acrobatics" OR DE "SKI cross" OR DE "SKI mountaineering" OR DE "SKI racing" OR DE "SKIS &amp; skiing" OR DE "SLALOM canoeing" OR DE "SLALOM racing" OR DE "SLALOM skiing" OR DE "SNOWBOARDING" OR DE "BACKCOUNTRY snowboarding" OR DE "SLOPESTYLE snowboarding" OR DE "SKIBOARDING" OR DE "SOCCER" OR DE "COLLEGE soccer" OR DE "HIGH school soccer" OR DE "INDOOR soccer" OR DE "PROFESSIONAL soccer" OR</p> |  |  |
|----------------------------------------------------------------------------------------------------------------------------------------------------------------------------------------------------------------------------------------------------------------------------------------------------------------------------------------------------------------------------------------------------------------------------------------------------------------------------------------------------------------------------------------------------------------------------------------------------------------------------------------------------------------------------------------------------------------------------------------------------------------------------------------------------------------------------------------------------------------------------------------------------------------------------------------------------------------------------------------------------------------------------------------------------------------------------------------------------------------------------------------------------------------------------------------------------------------------------------------------------------------------------------------------------------------------------------------------------------------------------------------------------------------------------------------------------------------------------------------------------------------------------------------------------------------------------------------------------------------------------------------------------------------------------------------------------------------------------------------------------------------------------------------------------------------------------------------------------------------------------------------------------------------------------------------------------------------------------------------------------------------------------------------------------------------------------------------------------------------------------------------------------------------------------------------------------------------------------------------------------------------------------------------------------------|--|--|

|     |                                                                                                                                                                                                                                                                                                                                                                                                                                                                                                                                                                                                                                                                                                                                                                                                                                                                                                                |                                         |         |
|-----|----------------------------------------------------------------------------------------------------------------------------------------------------------------------------------------------------------------------------------------------------------------------------------------------------------------------------------------------------------------------------------------------------------------------------------------------------------------------------------------------------------------------------------------------------------------------------------------------------------------------------------------------------------------------------------------------------------------------------------------------------------------------------------------------------------------------------------------------------------------------------------------------------------------|-----------------------------------------|---------|
|     | DE "SOFTBALL" OR DE "SLOW pitch softball" OR DE "YOUTH league softball" OR DE "SQUASH (Game)" OR DE "SWIMMING" OR DE "SWIMMING competitions" OR DE "SYNCHRONIZED swimming" OR DE "TENNIS" OR DE "COLLEGE tennis" OR DE "COURT tennis" OR DE "PROFESSIONAL tennis" OR DE "TABLE tennis" OR DE "TENNIS leagues" OR DE "TENNIS tournaments" OR DE "TENNIS training" OR DE "TRACK & field" OR DE "ALL-around (Track & field)" OR DE "COLLEGE track & field" OR DE "HURDLING (Track & field)" OR DE "INDOOR track & field" OR DE "JUMPING" OR DE "STEEPLECHASING (Track & field)" OR DE "VAULTING" OR DE "VOLLEYBALL" OR DE "BEACH volleyball" OR DE "COLLEGE volleyball" OR DE "PROFESSIONAL volleyball" OR DE "VOLLEYBALL competitions" OR DE "WRESTLING" OR DE "COLLEGE wrestling" OR DE "FREESTYLE wrestling" OR DE "HIGH school wrestling" OR DE "PROFESSIONAL wrestling" OR DE "SAMBO wrestling" OR DE "SUMO" |                                         |         |
| S20 | DE "AIKIDO" OR DE "JUDO" OR DE "SAN-jitsu" OR DE "JIU-jitsu" OR DE "KARATE" OR DE "TAE kwon do" OR DE "KICKBOXING" OR DE "MARTIAL arts" OR DE "CAPOEIRA (Dance)" OR DE "MIXED martial arts" OR DE "ARCHERY" OR DE "BADMINTON (Game)" OR DE "BADMINTON tournaments" OR DE "BADMINTON training" OR DE "CANOE racing" OR DE "CROSS-country ski racing" OR DE "NORDIC combined" OR DE "SPORT fencing" OR DE "FENCING" OR DE "KAYAKING" OR DE "KAYAKING training" OR DE "ICE luge racing" OR DE "SHOOTING contests" OR DE "ROWING" OR DE "SAILING" OR DE "SKELETON" OR DE "SKI jumping" OR DE "SLEDDING" OR DE "SURFING" OR DE "BODYBOARDING" OR DE "KITE surfing" OR DE "STAND-up paddle surfing" OR DE "WINDSURFING" OR DE "TRAMPOLINING" OR DE "WATER polo" OR DE "WEIGHT lifting" OR DE "YACHTING"                                                                                                              | Search modes - Find all my search terms | 59,827  |
| S21 | DE "ATHLETES" OR DE "ATHLETES' health" OR DE "ARCHERS" OR DE "BADMINTON players" OR DE "BASEBALL players" OR DE "BASKETBALL players" OR DE "BOBSLEDDERS" OR DE "BODYBUILDERS" OR DE "BOXERS (Sports)" OR DE "BULLFIGHTERS" OR DE "CANOEISTS" OR DE "COLLEGE athletes" OR DE "CRICKET players" OR DE "CYCLISTS" OR DE "DIVERS" OR DE "ELITE athletes" OR DE "ENDURANCE athletes" OR DE "FENCERS" OR DE "FOOTBALL players" OR DE "GOLFERS" OR DE "GYMNASTS" OR DE "HANDBALL players" OR DE "HIGH school athletes" OR DE "HOCKEY players" OR                                                                                                                                                                                                                                                                                                                                                                      | Search modes - Find all my search terms | 290,236 |

|     |                                                                                                                                                                                                                                                                                                                                                                                                                                                                                                                                                                                                                                                                                                                                                                                                                                                                                                                                                                                                                                                                                                                                               |                                         |        |
|-----|-----------------------------------------------------------------------------------------------------------------------------------------------------------------------------------------------------------------------------------------------------------------------------------------------------------------------------------------------------------------------------------------------------------------------------------------------------------------------------------------------------------------------------------------------------------------------------------------------------------------------------------------------------------------------------------------------------------------------------------------------------------------------------------------------------------------------------------------------------------------------------------------------------------------------------------------------------------------------------------------------------------------------------------------------------------------------------------------------------------------------------------------------|-----------------------------------------|--------|
|     | DE "JUNIOR high school athletes" OR DE "LACROSSE players" OR DE "MALE athletes" OR DE "MARTIAL artists" OR DE "MIDDLE school athletes" OR DE "MOUNTAINEERS" OR DE "NETBALL players" OR DE "OFFENSIVE players" OR DE "OLDER athletes" OR DE "OLYMPIC athletes" OR DE "PROFESSIONAL athletes" OR DE "ROWERS" OR DE "RUGBY football players" OR DE "RUGBY football teams" OR DE "SKATEBOARDERS" OR DE "SKATERS" OR DE "SKIERS" OR DE "SNOWBOARDERS" OR DE "SOCCER players" OR DE "SOFTBALL players" OR DE "SQUASH players" OR DE "SURFERS" OR DE "SWIMMERS" OR DE "TABLE tennis players" OR DE "TEAM handball players" OR DE "TENNIS players" OR DE "TRACK & field athletes" OR DE "TRIATHLETES" OR DE "VOLLEYBALL players" OR DE "WATER polo players" OR DE "WEIGHT lifters" OR DE "WINDSURFERS (Persons)" OR DE "WOMEN athletes" OR DE "WRESTLERS"                                                                                                                                                                                                                                                                                             |                                         |        |
| S22 | DE "MARTIAL artists" OR DE "ARCHERS" OR DE "BADMINTON players" OR DE "CANOEISTS" OR DE "KAYAKERS" OR DE "SAILORS" OR DE "SURFERS" OR DE "TRAMPOLINISTS" OR DE "WATER polo players" OR DE "WEIGHT lifters"                                                                                                                                                                                                                                                                                                                                                                                                                                                                                                                                                                                                                                                                                                                                                                                                                                                                                                                                     | Search modes - Find all my search terms | 7,029  |
| S23 | DE "SPORTS medicine" OR DE "PEDIATRIC sports medicine" OR DE "SPORTS emergencies" OR DE "SPORTS nutrition" OR DE "SPORTS ophthalmology" OR DE "SPORTS physical therapy" OR DE "SPORTS injuries" OR DE "AQUATIC sports injuries" OR DE "BASEBALL injuries" OR DE "BASKETBALL injuries" OR DE "BOXING injuries" OR DE "CRICKET injuries" OR DE "DIVING injuries" OR DE "DIVING accidents" OR DE "EQUESTRIAN accidents" OR DE "FOOTBALL injuries" OR DE "GOLF injuries" OR DE "GYMNASTICS injuries" OR DE "HOCKEY injuries" OR DE "HORSE sports injuries" OR DE "IN-line skating injuries" OR DE "JUDO injuries" OR DE "KARATE injuries" OR DE "MARTIAL arts injuries" OR DE "MOTORSPORTS injuries" OR DE "NETBALL injuries" OR DE "RACKET game injuries" OR DE "RUGBY football injuries" OR DE "SKATEBOARDING injuries" OR DE "SKIING injuries" OR DE "SKIING accidents" OR DE "SOCCER injuries" OR DE "TENNIS injuries" OR DE "VAULTING injuries" OR DE "VOLLEYBALL injuries" OR DE "WINTER sports injuries" OR DE "JUDO injuries" OR DE "KARATE injuries" OR DE "MARTIAL arts injuries" OR DE "CANOEING accidents" OR DE "YACHTING accidents" | Search modes - Find all my search terms | 34,396 |

|     |                                                                                                                                                                                                                                                                                                                                                                                                                                                                                                                                                                                                                                                                                                                                                                                                                                                                                                                                                                                                                                                                                                                                                                                                                                                                                                                                                                                                                                                                                                                                                                                                                                                                                                                                                                                                          |                                         |         |
|-----|----------------------------------------------------------------------------------------------------------------------------------------------------------------------------------------------------------------------------------------------------------------------------------------------------------------------------------------------------------------------------------------------------------------------------------------------------------------------------------------------------------------------------------------------------------------------------------------------------------------------------------------------------------------------------------------------------------------------------------------------------------------------------------------------------------------------------------------------------------------------------------------------------------------------------------------------------------------------------------------------------------------------------------------------------------------------------------------------------------------------------------------------------------------------------------------------------------------------------------------------------------------------------------------------------------------------------------------------------------------------------------------------------------------------------------------------------------------------------------------------------------------------------------------------------------------------------------------------------------------------------------------------------------------------------------------------------------------------------------------------------------------------------------------------------------|-----------------------------------------|---------|
| S24 | TI ( (athlete* or athletic* or crew or player* or teammate* or "team-mate*" or varsity) ) OR AB ( (athlete* or athletic* or crew or player* or teammate* or "team-mate*" or varsity) ) OR KW ( (athlete* or athletic* or crew or player* or teammate* or "team-mate*" or varsity) )                                                                                                                                                                                                                                                                                                                                                                                                                                                                                                                                                                                                                                                                                                                                                                                                                                                                                                                                                                                                                                                                                                                                                                                                                                                                                                                                                                                                                                                                                                                      | Search modes - Find all my search terms | 373,513 |
| S25 | TI sport* OR AB sport* OR KW sport* OR SO sport*                                                                                                                                                                                                                                                                                                                                                                                                                                                                                                                                                                                                                                                                                                                                                                                                                                                                                                                                                                                                                                                                                                                                                                                                                                                                                                                                                                                                                                                                                                                                                                                                                                                                                                                                                         | Search modes - Find all my search terms | 790,292 |
| S26 | TI ( ((return* or resum* or "re-ent*" or reent*) N2 (play* or competition* or sport*)) ) OR AB ( ((return* or resum* or "re-ent*" or reent*) N2 (play* or competition* or sport*)) ) OR KW ( ((return* or resum* or "re-ent*" or reent*) N2 (play* or competition* or sport*)) )                                                                                                                                                                                                                                                                                                                                                                                                                                                                                                                                                                                                                                                                                                                                                                                                                                                                                                                                                                                                                                                                                                                                                                                                                                                                                                                                                                                                                                                                                                                         | Search modes - Find all my search terms | 6,482   |
| S27 | TI ( (baseball or basketball or biking or bicycling* or bmx or boxing or "bull rid*" or bullrid* or cheerleading or "cheer leading" or climbing or cricket or diving or equestrian or football or golf or gymnastics or handball or "horse* riding" or hockey or lacrosse or mountaineering or netball or "net ball" or "racquet sport*" or racquetball or ringette or rodeo* or "roller derb*" or rollerskat* rugby or skateboard* or skating or skiing or snowboard* or "snow sport*" or soccer or softball or squash or swimming or tennis or "track and field" or wrestling or volleyball) ) OR AB ( (baseball or basketball or biking or bicycling* or bmx or boxing or "bull rid*" or bullrid* or cheerleading or "cheer leading" or climbing or cricket or diving or equestrian or football or golf or gymnastics or handball or "horse* riding" or hockey or lacrosse or mountaineering or netball or "net ball" or "racquet sport*" or racquetball or ringette or rodeo* or "roller derb*" or rollerskat* rugby or skateboard* or skating or skiing or snowboard* or "snow sport*" or soccer or softball or squash or swimming or tennis or "track and field" or wrestling or volleyball) ) OR KW ( (baseball or basketball or biking or bicycling* or bmx or boxing or "bull rid*" or bullrid* or cheerleading or "cheer leading" or climbing or cricket or diving or equestrian or football or golf or gymnastics or handball or "horse* riding" or hockey or lacrosse or mountaineering or netball or "net ball" or "racquet sport*" or racquetball or ringette or rodeo* or "roller derb*" or rollerskat* rugby or skateboard* or skating or skiing or snowboard* or "snow sport*" or soccer or softball or squash or swimming or tennis or "track and field" or wrestling or volleyball) ) | Search modes - Find all my search terms | 573,584 |
| S28 | TI ( (archery or badminton or bobsled* or bobsleigh* or canoe* or "cross country" or fencing or kayak* or luge or rifle or rowing or sailing or skeleton or "ski jump*" or sledding or surfing or trampolin* or "water polo" or "weight lifting" or windsurfing or yachting) ) OR AB ( (archery or badminton or bobsled* or bobsleigh* or canoe* or "cross country" or fencing or kayak* or luge or rifle or                                                                                                                                                                                                                                                                                                                                                                                                                                                                                                                                                                                                                                                                                                                                                                                                                                                                                                                                                                                                                                                                                                                                                                                                                                                                                                                                                                                             | Search modes - Find all my search terms | 54,011  |

|     |                                                                                                                                                                                                                                                                                                                                                                                                                                                                                                                                                                                                                                                                                                                                                                                                                                                                                                                                                                                                                                                                                                                                                                |                                         |           |
|-----|----------------------------------------------------------------------------------------------------------------------------------------------------------------------------------------------------------------------------------------------------------------------------------------------------------------------------------------------------------------------------------------------------------------------------------------------------------------------------------------------------------------------------------------------------------------------------------------------------------------------------------------------------------------------------------------------------------------------------------------------------------------------------------------------------------------------------------------------------------------------------------------------------------------------------------------------------------------------------------------------------------------------------------------------------------------------------------------------------------------------------------------------------------------|-----------------------------------------|-----------|
|     | rowing or sailing or skeleton or "ski jump*" or sledding or surfing or trampolin* or "water polo" or "weight lifting" or windsurfing or yachting) ) OR KW ( (archery or badminton or bobsled* or bobsleigh* or canoe* or "cross country" or fencing or kayak* or luge or rifle or rowing or sailing or skeleton or "ski jump*" or sledding or surfing or trampolin* or "water polo" or "weight lifting" or windsurfing or yachting) )                                                                                                                                                                                                                                                                                                                                                                                                                                                                                                                                                                                                                                                                                                                          |                                         |           |
| S29 | TI ( (aikido or judo or jiu-jitsu or "jiu-jitsu" or jujitsu or "ju jitsu" or karate or kickbox* or "Martial art*" or taekwondo or "tae kwon do" or "tai ji" ) ) OR AB ( (aikido or judo or jiu-jitsu or "jiu-jitsu" or jujitsu or "ju jitsu" or karate or kickbox* or "Martial art*" or taekwondo or "tae kwon do" or "tai ji" ) ) OR KW ( (aikido or judo or jiu-jitsu or "jiu-jitsu" or jujitsu or "ju jitsu" or karate or kickbox* or "Martial art*" or taekwondo or "tae kwon do" or "tai ji" ) )                                                                                                                                                                                                                                                                                                                                                                                                                                                                                                                                                                                                                                                          | Search modes - Find all my search terms | 14,911    |
| S30 | TI ( (capoeira or "Dim mak" or kenpo or "kung fu" or "pencak silat" or pitfight* or savate or "submission fight*" or UFC or "ultimate fighting champion*" ) ) OR AB ( (capoeira or "Dim mak" or kenpo or "kung fu" or "pencak silat" or pitfight* or savate or "submission fight*" or UFC or "ultimate fighting champion*" ) ) OR KW ( (capoeira or "Dim mak" or kenpo or "kung fu" or "pencak silat" or pitfight* or savate or "submission fight*" or UFC or "ultimate fighting champion*" ) )                                                                                                                                                                                                                                                                                                                                                                                                                                                                                                                                                                                                                                                                | Search modes - Find all my search terms | 1,743     |
| S31 | TI ( (biker* or boxer* or "cheer leader*" or cheerleader* or climber* or cyclist* or diver or divers or fencer* or fighter* or footballer* or goalie* or golfer* or gymnast or gymnasts or "horse* rider*" or jockey* or judoka* or mountaineer* or rower* or sailor* or skater* or skier* or sledder* or snowboarder* or surfer* or swimmer* or "weight lifter*" or wrestler* ) ) OR AB ( (biker* or boxer* or "cheer leader*" or cheerleader* or climber* or cyclist* or diver or divers or fencer* or fighter* or footballer* or goalie* or golfer* or gymnast or gymnasts or "horse* rider*" or jockey* or judoka* or mountaineer* or rower* or sailor* or skater* or skier* or sledder* or snowboarder* or surfer* or swimmer* or "weight lifter*" or wrestler* ) ) OR KW ( (biker* or boxer* or "cheer leader*" or cheerleader* or climber* or cyclist* or diver or divers or fencer* or fighter* or footballer* or goalie* or golfer* or gymnast or gymnasts or "horse* rider*" or jockey* or judoka* or mountaineer* or rower* or sailor* or skater* or skier* or sledder* or snowboarder* or surfer* or swimmer* or "weight lifter*" or wrestler* ) ) | Search modes - Find all my search terms | 149,848   |
| S32 | S18 OR S19 OR S20 OR S21 OR S22 OR S23 OR S24 OR S25 OR S26 OR S27 OR S28 OR S29 OR S30 OR S31                                                                                                                                                                                                                                                                                                                                                                                                                                                                                                                                                                                                                                                                                                                                                                                                                                                                                                                                                                                                                                                                 | Search modes - Find all my search terms | 1,478,336 |

|     |                                                                                                                                                                                                                                                                                                                                                                                                                                                                                                                                                                                                          |                                         |        |
|-----|----------------------------------------------------------------------------------------------------------------------------------------------------------------------------------------------------------------------------------------------------------------------------------------------------------------------------------------------------------------------------------------------------------------------------------------------------------------------------------------------------------------------------------------------------------------------------------------------------------|-----------------------------------------|--------|
| S33 | S17 AND S32                                                                                                                                                                                                                                                                                                                                                                                                                                                                                                                                                                                              | Search modes - Find all my search terms | 7,261  |
| S34 | DE "COGNITION disorders"                                                                                                                                                                                                                                                                                                                                                                                                                                                                                                                                                                                 | Search modes - Find all my search terms | 1,282  |
| S35 | DE "MENTAL illness"                                                                                                                                                                                                                                                                                                                                                                                                                                                                                                                                                                                      | Search modes - Find all my search terms | 2,466  |
| S36 | DE "SUBSTANCE abuse" OR DE "ADDICTIONS" OR DE "ALCOHOLISM" OR DE "DRUG abuse"                                                                                                                                                                                                                                                                                                                                                                                                                                                                                                                            | Search modes - Find all my search terms | 13,981 |
| S37 | TI ( ((cognitive or memory or executive) N2 (impair* or abnormal* or dysfunction* or deficit* or disorder* or disabilit* or decline or disturbance* or deteriorat* or decrement* or sequela*)) ) OR AB ( ((cognitive or memory or executive) N2 (impair* or abnormal* or dysfunction* or deficit* or disorder* or disabilit* or decline or disturbance* or deteriorat* or decrement* or sequela*)) ) OR KW ( ((cognitive or memory or executive) N2 (impair* or abnormal* or dysfunction* or deficit* or disorder* or disabilit* or decline or disturbance* or deteriorat* or decrement* or sequela*)) ) | Search modes - Find all my search terms | 5,358  |
| S38 | TI ( ((drug* or alcohol* or substance) N2 (dependen* or abuse or disorder*)) ) OR AB ( ((drug* or alcohol* or substance) N2 (dependen* or abuse or disorder*)) ) OR KW ( ((drug* or alcohol* or substance) N2 (dependen* or abuse or disorder*)) )                                                                                                                                                                                                                                                                                                                                                       | Search modes - Find all my search terms | 10,668 |
| S39 | DE "MENTAL depression"                                                                                                                                                                                                                                                                                                                                                                                                                                                                                                                                                                                   | Search modes - Find all my search terms | 6,552  |
| S40 | DE "SELF-destructive behavior"                                                                                                                                                                                                                                                                                                                                                                                                                                                                                                                                                                           | Search modes - Find all my search terms | 74     |
| S41 | DE "SUICIDE"                                                                                                                                                                                                                                                                                                                                                                                                                                                                                                                                                                                             | Search modes - Find all my search terms | 799    |
| S42 | DE "AGGRESSION (Psychology)"                                                                                                                                                                                                                                                                                                                                                                                                                                                                                                                                                                             | Search modes - Find all my search terms | 1,132  |
| S43 | DE "ANXIETY"                                                                                                                                                                                                                                                                                                                                                                                                                                                                                                                                                                                             | Search modes - Find all my search terms | 7,609  |
| S44 | DE "AFFECTIVE disorders"                                                                                                                                                                                                                                                                                                                                                                                                                                                                                                                                                                                 | Search modes - Find all my search terms | 759    |
| S45 | TI ( ((psychiatric or mental* or psychological) N2 (illness or impair* or abnormal* or dysfunction* or deficit* or decline or deteriorat*)) ) OR AB ( ((psychiatric or mental* or psychological) N2 (illness or impair* or abnormal* or dysfunction* or deficit* or decline or deteriorat*)) ) OR KW ( ((psychiatric or mental* or psychological) N2 (illness or impair* or abnormal* or dysfunction* or deficit* or decline or deteriorat*)) )                                                                                                                                                          | Search modes - Find all my search terms | 2,222  |
| S46 | TI ( ((neuropsychological or neurophysiological or neuropsychiatric or neurocognitive) N2 (impair* or                                                                                                                                                                                                                                                                                                                                                                                                                                                                                                    | Search modes - Find all my search terms | 241    |



|     |                                                                                                                                                                                                                                                                                                                                                                                                                                          |                                         |        |
|-----|------------------------------------------------------------------------------------------------------------------------------------------------------------------------------------------------------------------------------------------------------------------------------------------------------------------------------------------------------------------------------------------------------------------------------------------|-----------------------------------------|--------|
|     | abnormal* or dysfunction* or decline or disturbance* or deteriorat*) ) OR AB ( ((neuropsychological or neurophysiological or neuropsychiatric or neurocognitive) N2 (impair* or abnormal* or dysfunction* or decline or disturbance* or deteriorat*) ) OR AB ( ((neuropsychological or neurophysiological or neuropsychiatric or neurocognitive) N2 (impair* or abnormal* or dysfunction* or decline or disturbance* or deteriorat*) ) ) |                                         |        |
| S47 | TI ( (depress* or suicide or suicidal or aggression or aggressive or anger or angry or rage or anxiety) ) OR AB ( (depress* or suicide or suicidal or aggression or aggressive or anger or angry or rage or anxiety) ) OR KW ( (depress* or suicide or suicidal or aggression or aggressive or anger or angry or rage or anxiety) )                                                                                                      | Search modes - Find all my search terms | 40,915 |
| S48 | TI ( ("mood disorder*" or psychos?s) ) OR AB ( ("mood disorder*" or psychos?s) ) OR KW ( ("mood disorder*" or psychos?s) )                                                                                                                                                                                                                                                                                                               | Search modes - Find all my search terms | 1,250  |
| S49 | TI ( ((chronic or persistent) N2 headache*) ) OR AB ( ((chronic or persistent) N2 headache*) ) OR KW ( ((chronic or persistent) N2 headache*) )                                                                                                                                                                                                                                                                                          | Search modes - Find all my search terms | 838    |
| S50 | DE "DEGENERATION (Pathology)"                                                                                                                                                                                                                                                                                                                                                                                                            | Search modes - Find all my search terms | 453    |
| S51 | DE "CHRONIC traumatic encephalopathy"                                                                                                                                                                                                                                                                                                                                                                                                    | Search modes - Find all my search terms | 110    |
| S52 | DE "DEMENTIA"                                                                                                                                                                                                                                                                                                                                                                                                                            | Search modes - Find all my search terms | 860    |
| S53 | DE "ALZHEIMER'S disease"                                                                                                                                                                                                                                                                                                                                                                                                                 | Search modes - Find all my search terms | 1,070  |
| S54 | DE "AMYOTROPHIC lateral sclerosis"                                                                                                                                                                                                                                                                                                                                                                                                       | Search modes - Find all my search terms | 353    |
| S55 | DE "PARKINSON'S disease"                                                                                                                                                                                                                                                                                                                                                                                                                 | Search modes - Find all my search terms | 1,732  |
| S56 | TI ( ("chronic traumatic encephalopath*" or CTE or "traumatic encephalopath*" ) OR AB ( ("chronic traumatic encephalopath*" or CTE or "traumatic encephalopath*" ) ) OR KW ( ("chronic traumatic encephalopath*" or CTE or "traumatic encephalopath*" ) )                                                                                                                                                                                | Search modes - Find all my search terms | 202    |
| S57 | TI ( ((neurodegenerative or neurobehavioral or neurobehavioural) N2 (disorder* or disease*)) ) OR AB ( ((neurodegenerative or neurobehavioral or neurobehavioural) N2 (disorder* or disease*)) ) OR KW ( ((neurodegenerative or neurobehavioral or neurobehavioural) N2 (disorder* or disease*)) )                                                                                                                                       | Search modes - Find all my search terms | 772    |

|     |                                                                                                                                                                                                                                                                                                                                                                                                                                                                                                             |                                         |        |
|-----|-------------------------------------------------------------------------------------------------------------------------------------------------------------------------------------------------------------------------------------------------------------------------------------------------------------------------------------------------------------------------------------------------------------------------------------------------------------------------------------------------------------|-----------------------------------------|--------|
| S58 | TI ( (“dementia pugilistica” or “punch drunk”) ) OR AB ( (“dementia pugilistica” or “punch drunk”) ) OR KW ( (“dementia pugilistica” or “punch drunk”) )                                                                                                                                                                                                                                                                                                                                                    | Search modes - Find all my search terms | 39     |
| S59 | TI ( (alzheimer* or “amyotrophic lateral sclerosis” or ALS or parkinson*) ) OR AB ( (alzheimer* or “amyotrophic lateral sclerosis” or ALS or parkinson*) ) OR KW ( (alzheimer* or “amyotrophic lateral sclerosis” or ALS or parkinson*) )                                                                                                                                                                                                                                                                   | Search modes - Find all my search terms | 9,108  |
| S60 | TI ( (“motor neuron” N1 (disease* or disorder*)) ) OR AB ( (“motor neuron” N1 (disease* or disorder*)) ) OR KW ( (“motor neuron” N1 (disease* or disorder*)) )                                                                                                                                                                                                                                                                                                                                              | Search modes - Find all my search terms | 63     |
| S61 | TI hypopituitarism OR AB hypopituitarism OR KW hypopituitarism                                                                                                                                                                                                                                                                                                                                                                                                                                              | Search modes - Find all my search terms | 100    |
| S62 | TI ( ((endocrine or hormon* or metabolic) N2 dysfunction) ) OR AB ( ((endocrine or hormon* or metabolic) N2 dysfunction) ) OR KW ( ((endocrine or hormon* or metabolic) N2 dysfunction) )                                                                                                                                                                                                                                                                                                                   | Search modes - Find all my search terms | 275    |
| S63 | TI seizure* OR AB seizure* OR KW seizure*                                                                                                                                                                                                                                                                                                                                                                                                                                                                   | Search modes - Find all my search terms | 1,269  |
| S64 | DE "CEREBRAL cortex"                                                                                                                                                                                                                                                                                                                                                                                                                                                                                        | Search modes - Find all my search terms | 533    |
| S65 | TI ( (“white matter” or taupath* or tau or “tap-43” or “septum pellucid**”) ) OR AB ( (“white matter” or taupath* or tau or “tap-43” or “septum pellucid**”) ) OR KW ( (“white matter” or taupath* or tau or “tap-43” or “septum pellucid**”) )                                                                                                                                                                                                                                                             | Search modes - Find all my search terms | 955    |
| S66 | TI ( (cortical N2 (thick* or thin*)) ) OR AB ( (cortical N2 (thick* or thin*)) ) OR KW ( (cortical N2 (thick* or thin*)) )                                                                                                                                                                                                                                                                                                                                                                                  | Search modes - Find all my search terms | 421    |
| S67 | TI ( ((longterm or “long term” or permanent or cumulative or chronic or residual) N2 (consequences or effects or outcome* or sequela* or prognosis or damage*)) ) OR AB ( ((longterm or “long term” or permanent or cumulative or chronic or residual) N2 (consequences or effects or outcome* or sequela* or prognosis or damage*)) ) OR KW ( ((longterm or “long term” or permanent or cumulative or chronic or residual) N2 (consequences or effects or outcome* or sequela* or prognosis or damage*)) ) | Search modes - Find all my search terms | 9,125  |
| S68 | S34 OR S35 OR S36 OR S37 OR S38 OR S39 OR S40 OR S41 OR S42 OR S43 OR S44 OR S45 OR S46 OR S47 OR S48 OR S49 OR S50 OR S51 OR S52 OR S53 OR S54 OR S55 OR S56 OR S57 OR S58 OR S59 OR S60 OR S61 OR S62 OR S63 OR S64 OR S65 OR S66 OR S67                                                                                                                                                                                                                                                                  | Search modes - Find all my search terms | 89,721 |
| S69 | S33 AND S68                                                                                                                                                                                                                                                                                                                                                                                                                                                                                                 | Search modes - Find all my search terms | 1,071  |

|     |             |                                                                                                                                                                 |     |
|-----|-------------|-----------------------------------------------------------------------------------------------------------------------------------------------------------------|-----|
| S70 | S33 AND S68 | Limiters - Scholarly (Peer Reviewed) Journals<br>Search modes - Find all my search terms                                                                        | 827 |
| S71 | S33 AND S68 | Limiters - Published Date: 20010101-20221231;<br>Scholarly (Peer Reviewed) Journals<br>Search modes - Find all my search terms                                  | 782 |
| S72 | S33 AND S68 | Limiters - Published Date: 20010101-20221231;<br>Scholarly (Peer Reviewed) Journals<br>Narrow by Language: - english<br>Search modes - Find all my search terms | 750 |

921  
922

923 **Scopus (Eslevier) as searched March 25, 2022**

924  
 925 (( TITLE-ABS-KEY ( ( concussion\* OR concussed OR concussive OR subconcuss\* OR sub-concuss\* ) )  
 926 OR TITLE-ABS-KEY ( mild W/3 ( "traumatic brain injur\*" OR tbi\* ) ) OR TITLE-ABS-KEY ( post-  
 927 concuss\* OR postconcuss\* ) OR TITLE-ABS-KEY ( head W/2 ( injur\* OR impact\* OR trauma\* ) ) OR  
 928 TITLE-ABS-KEY ( ( "traumatic brain injur\*" OR tbi\* OR mtbi\* OR neurotrauma\* OR "neuro-  
 929 trauma\*" ) ) OR TITLE-ABS-KEY ( craniocerebral W/2 ( trauma\* OR injur\* ) ) OR TITLE-ABS-  
 930 KEY ( ( repetitive OR multiple OR cumulative ) W/3 ( "head injur\*" OR "head impact\*" OR concussion\*  
 931 OR "head trauma" ) ) OR TITLE-ABS-KEY ( ( subconcuss\* OR sub-concuss\* ) W/3 ( impact\* OR  
 932 blow\* ) ) OR TITLE-ABS-KEY ( ( "chronic traumatic encephalopath\*" OR cte ) ) OR TITLE-ABS-  
 933 KEY ( neurodegenerative W/2 ( disease\* OR disorder\* ) ) )  
 934 AND  
 935 ( ( ( SRCTITLE ( sport\* ) OR TITLE-ABS-KEY ( athlete\* OR athletic\* OR crew OR player\* OR  
 936 teammate\* OR team-mate\* OR varsity OR sport\* ) OR TITLE-ABS-KEY ( ( return\* OR resum\* OR  
 937 "re-ent\*" OR reent\* ) W/2 ( play\* OR competition\* OR sport\* ) ) ) ) OR ( ( TITLE-ABS-  
 938 KEY ( baseball OR basketball OR biking OR bicycling\* OR bmx OR boxing OR "bull rid\*" OR bullrid\*  
 939 OR cheerleading OR "cheer leading" OR climbing OR cricket OR diving OR equestrian OR football OR  
 940 golf OR gymnastics OR handball OR "horse\* riding" OR hockey OR lacro ) OR TITLE-ABS-  
 941 KEY ( "horse\* riding" OR hockey OR lacrosse OR mountaineering OR netball OR "net ball" OR  
 942 "racquet sport\*" OR racquetball OR ringette OR "roller derb\*" OR rollerskat\* OR rodeo\* ) OR TITLE-  
 943 ABS-KEY ( rugby OR skateboard\* OR skating OR skiing OR snowboard\* OR "snow sport\*" OR soccer  
 944 OR softball OR squash OR swimming OR tennis OR "track and field" OR wrestling OR volleyball ) OR  
 945 TITLE-ABS-KEY ( archery OR badminton OR bobsled\* OR bobsleigh\* OR canoe\* OR "cross country"  
 946 OR fencing OR kayak\* OR luge OR rifle ) OR TITLE-ABS-KEY ( rowing OR sailing OR skeleton OR  
 947 "ski jump\*" OR sledding OR surfing OR trampolin\* OR "water polo" OR "weight lifting" OR  
 948 windsurfing OR yachting ) ) ) OR ( ( TITLE-ABS-KEY ( aikido OR judo OR jiujitsu OR "jiu-jitsu" OR  
 949 jujitsu OR "ju jitsu" OR karate OR kickbox\* OR "Martial art\*" OR taekwondo OR "tae kwon do" OR "tai  
 950 ji" ) OR TITLE-ABS-KEY ( capoeira OR "Dim mak" OR kenpo OR "kung fu" OR "pencak silat" OR  
 951 pitfight\* OR savate OR "submission fight\*" OR ufc OR "ultimate fighting champion\*" ) OR TITLE-  
 952 ABS-KEY ( biker\* OR boxer\* OR "cheer leader\*" OR cheerleader\* OR climber\* OR cyclist\* OR diver  
 953 OR divers OR fencer\* OR fighter\* OR footballer\* OR goalie\* ) OR TITLE-ABS-KEY ( golfer\* OR  
 954 gymnast OR gymnasts OR "horse\* rider\*" OR jockey\* OR judoka\* OR mountaineer\* OR rower\* OR  
 955 sailor\* OR skater\* OR skier\* OR sledder\* OR snowboarder\* OR surfer\* OR swimmer\* OR "weight  
 956 lifter\*" OR wrestler\* ) ) ) ) )  
 957 AND  
 958 ( ( ( TITLE-ABS-KEY ( ( ( cognitive OR memory OR executive ) W/2 ( impair\* OR abnormal\* OR  
 959 dysfunction\* OR deficit\* OR disorder\* OR disabilit\* OR decline OR disturbance\* OR deteriorat\* OR  
 960 decrement\* OR sequela\* ) ) ) OR TITLE-ABS-KEY ( ( ( drug\* OR alcohol\* OR substance ) W/2  
 961 ( dependen\* OR abuse OR disorder\* ) ) ) OR TITLE-ABS-KEY ( ( ( psychiatric OR mental\* OR  
 962 psychological ) W/2 ( illness OR impair\* OR abnormal\* OR dysfunction\* OR deficit\* OR decline OR  
 963 deteriorat\* ) ) ) ) ) OR ( TITLE-ABS-KEY ( ( ( neuropsychological OR neurophysiological OR  
 964 neuropsychiatric OR neurocognitive ) W/2 ( impair\* OR abnormal\* OR dysfunction\* OR decline OR  
 965 disturbance\* OR deteriorat\* ) ) ) ) OR ( TITLE-ABS-KEY ( ( depress\* OR suicide OR suicidal OR  
 966 aggression OR aggressive OR anger OR angry OR rage OR anxiety OR "mood disorder\*" OR  
 967 psychos?s ) ) ) OR ( TITLE-ABS-KEY ( ( ( chronic OR persistent ) W/2 headache\* ) ) ) OR ( ( TITLE-  
 968 ABS-KEY ( "chronic traumatic encephalopath\*" OR cte OR "traumatic encephalopath\*" OR "dementia  
 969 pugilistica" OR "punch drunk" OR alzheimer\* OR "amyotrophic lateral sclerosis" OR als OR  
 970 parkinson\* ) OR TITLE-ABS-KEY ( hypopituitarism OR seizure\* OR "white matter" OR taupath\* OR  
 971 tau OR tap-43 OR "septum pellucid\*" ) OR TITLE-ABS-KEY ( ( ( neurodegenerative OR  
 972 neurobehavioral OR neurobehavioural ) W/2 ( disorder\* OR disease\* ) ) ) ) ) OR ( TITLE-ABS-  
 973 KEY ( ( "motor neuron" W/1 ( disease\* OR disorder\* ) ) ) ) OR ( TITLE-ABS-KEY ( ( ( endocrine OR

974 hormon\* OR metabolic ) W/2 dysfunction ) ) OR ( TITLE-ABS-KEY ( ( cortical W/2 ( thick\* OR  
975 thin\* ) ) ) ) OR ( TITLE-ABS-KEY ( ( longterm OR "long term" OR permanent OR cumulative OR  
976 chronic OR residual ) W/2 ( consequences OR effects OR outcome\* OR sequela\* OR prognosis OR  
977 damage\* ) ) ) ) AND NOT DBCOLL ( medl ) AND ( LIMIT-TO ( PUBYEAR , 2022 ) OR LIMIT-  
978 TO ( PUBYEAR , 2021 ) OR LIMIT-TO ( PUBYEAR , 2020 ) OR LIMIT-TO ( PUBYEAR , 2019 ) OR  
979 LIMIT-TO ( PUBYEAR , 2018 ) OR LIMIT-TO ( PUBYEAR , 2017 ) OR LIMIT-TO ( PUBYEAR ,  
980 2016 ) OR LIMIT-TO ( PUBYEAR , 2015 ) OR LIMIT-TO ( PUBYEAR , 2014 ) OR LIMIT-  
981 TO ( PUBYEAR , 2013 ) OR LIMIT-TO ( PUBYEAR , 2012 ) OR LIMIT-TO ( PUBYEAR , 2011 ) OR  
982 LIMIT-TO ( PUBYEAR , 2010 ) OR LIMIT-TO ( PUBYEAR , 2009 ) OR LIMIT-TO ( PUBYEAR ,  
983 2008 ) OR LIMIT-TO ( PUBYEAR , 2007 ) OR LIMIT-TO ( PUBYEAR , 2006 ) OR LIMIT-  
984 TO ( PUBYEAR , 2005 ) OR LIMIT-TO ( PUBYEAR , 2004 ) OR LIMIT-TO ( PUBYEAR , 2003 ) OR  
985 LIMIT-TO ( PUBYEAR , 2002 ) OR LIMIT-TO ( PUBYEAR , 2001 ) ) AND ( LIMIT-  
986 TO ( LANGUAGE , "English" ) )  
987 Note: Excluded Medline records, limited by date and English  
988 **Web of Science as searched March 25, 2022**  
989 ( (concussion\* OR concussed OR concussive OR subconcuss\* OR sub-concuss\*) OR (post-concuss\* OR  
990 postconcuss\*) OR (mild NEAR/3 ( "traumatic brain injur\*" OR tbi\* ) OR (head NEAR/2 ( injur\* OR  
991 impact\* OR trauma\* ) ) OR ( "traumatic brain injur\*" OR tbi\* OR mtbi\* OR neurotrauma\* OR "neuro-  
992 trauma\*" ) OR (craniocerebral NEAR/2 (trauma\* OR Injur\*)) OR ((repetitive \* OR multiple \* OR  
993 cumulative) W/3 ( "head injur\*" \* OR "head impact\*" \* OR concussion\* \* OR "head trauma" ) ) OR ((  
994 subconcuss\* \* OR sub-concuss\*) W/3 (impact\* \* OR blow\* ) ) OR ( "chronic traumatic  
995 encephalopath\*" \* OR CTE) OR (neurodegenerative NEAR/2 (disease\* \* OR disorder\*))  
996  
997 **AND**  
998  
999 ( (sport\*) OR (athlete\* OR athletic\* OR crew OR player\* OR teammate\* OR team-mate\* OR varsity OR  
1000 sport\*) OR ((return\* OR resum\* OR "re-ent\*" OR reent\*) NEAR/2 (play\* OR competition\* OR sport\* ) )  
1001 OR (baseball OR basketball OR biking OR bicycling\* OR bmx OR boxing OR "bull rid\*" OR bullrid\*  
1002 OR cheerleading OR "cheer leading" OR climbing OR cricket OR diving OR equestrian OR football OR  
1003 golf OR gymnastics OR handball OR "horse\* riding" OR hockey OR lacrosse OR mountaineering OR  
1004 netball OR "net ball" OR "racquet sport\*" OR racquetball OR ringette OR "roller derb\*" OR rollerskat\*  
1005 OR rodeo\* OR rugby OR skateboard\* OR skating OR skiing OR snowboard\* OR "snow sport\*" OR  
1006 soccer OR softball OR squash OR swimming OR tennis OR "track and field" OR wrestling OR  
1007 volleyball OR archery OR badminton OR bobsled\* OR bobsleigh\* OR canoe\* OR "cross country" OR  
1008 fencing OR kayak\* OR luge OR rifle OR rowing OR sailing OR skeleton OR "ski jump\*" OR sledding  
1009 OR surfing OR trampoline\* OR "water polo" OR "weight lifting" OR windsurfing OR yachting) OR  
1010 (aikido OR judo OR jujitsu OR "jiu-jitsu" OR jujitsu OR "ju jitsu" OR karate OR kickbox\* OR "Martial  
1011 art\*" OR taekwondo OR "tae kwon do" OR "tai ji") OR (capoeira OR "Dim mak" OR kenpo OR "kung  
1012 fu" OR "pencak silat" OR pitfight\* OR savate OR "submission fight\*" OR ufc OR "ultimate fighting  
1013 champion\*") OR (biker\* OR boxer\* OR "cheer leader\*" OR cheerleader\* OR climber\* OR cyclist\* OR  
1014 diver OR divers OR fencer\* OR fighter\* OR footballer\* OR goalie\* OR golfer\* OR gymnast OR  
1015 gymnasts OR "horse\* rider\*" OR jockey\* OR judoka\* OR mountaineer\* OR rower\* OR sailor\* OR  
1016 skater\* OR skier\* OR sledder\* OR snowboarder\* OR surfer\* OR swimmer\* OR "weight lifter\*" OR  
1017 wrestler\* ) )  
1018 **AND**  
1019 (longterm OR "long term" OR permanent OR cumulative OR chronic OR residual) NEAR/2 (consequences OR  
1020 effects OR outcome\* OR sequela\* OR prognosis OR damage\*) OR (cortical NEAR/2 (thick\* OR thin\*)) OR  
1021 ("white matter" OR taupath\* OR tau OR "tap-43" OR "septum pellucid\*") OR seizure\* OR ((endocrine OR  
1022 hormon\* OR metabolic) NEAR/2 dysfunction) OR hypopituitarism OR (( "motor neuron" ) NEAR/1  
1023 (disease\* OR disorder\*)) OR (alzheimer\* OR "amyotrophic lateral sclerosis" OR ALS OR parkinson\*) OR  
1024 ("dementia pugilistica" OR "punch drunk") OR ((neurodegenerative OR neurobehavioral OR

1025 neurobehavioural) NEAR/2 (disorder\* or disease\*) OR (“chronic traumatic encephalopath\*” or CTE or  
1026 “traumatic encephalopath\*”) OR ((chronic or persistent) NEAR/2 headache\*) OR (“mood disorder\*” or  
1027 psychosis or psychoses) OR (depress\* or suicide or suicidal or aggression or aggressive or anger or angry  
1028 or rage or anxiety) OR ((neuropsychological or neurophysiological or neuropsychiatric or neurocognitive)  
1029 NEAR/2 (impair\* or abnormal\* or dysfunction\* or decline or disturbance\* or deteriorat\*)) OR ((drug\* or  
1030 alcohol\* or substance) NEAR/2 (dependen\* or abuse or disorder\*)) OR ((cognitive or memory or  
1031 executive) NEAR/2 (impair\* or abnormal\* or dysfunction\* or deficit\* or disorder\* or disabilit\* or decline  
1032 or disturbance\* or deteriorat\* or decrement\* or sequela\*))

1033

1034 Limited to 2001 – 2022

1035

English

1036

1037

1038 Appendix B. References<sup>2</sup>

1039

- 1040 1. Morales JS, Valenzuela PL, Saco-Ledo G et al. Mortality Risk from Neurodegenerative  
1041 Disease in Sports Associated with Repetitive Head Impacts: Preliminary Findings from a  
1042 Systematic Review and Meta-Analysis. *Sports Med* 2022; 52: 835-846. DOI:  
1043 10.1007/s40279-021-01580-0
- 1044 2. Echlin HV, Rahimi A, Wojtowicz M. Systematic Review of the Long-Term  
1045 Neuroimaging Correlates of Mild Traumatic Brain Injury and Repetitive Head Injuries.  
1046 *Front Neurol* 2021; 12: 726425. DOI: 10.3389/fneur.2021.726425
- 1047 3. Morales JS, Castillo-Garcia A, Valenzuela PL et al. Mortality from mental disorders and  
1048 suicide in male professional American football and soccer players: A meta-analysis.  
1049 *Scand J Med Sci Sports* 2021; 31: 2241-2248. DOI: 10.1111/sms.14038
- 1050 4. Sparks P, Lawrence T, Hinze S. Neuroimaging in the Diagnosis of Chronic Traumatic  
1051 Encephalopathy: A Systematic Review. *Clin J Sport Med* 2020; 30 Suppl 1: S1-S10.  
1052 DOI: 10.1097/JSM.0000000000000541
- 1053 5. Gallo V, Motley K, Kemp SPT et al. Concussion and long-term cognitive impairment  
1054 among professional or elite sport-persons: a systematic review. *J Neurol Neurosurg*  
1055 *Psychiatry* 2020; 91: 455-468. DOI: 10.1136/jnnp-2019-321170
- 1056 6. Cunningham J, Broglio SP, O'Grady M et al. History of Sport-Related Concussion and  
1057 Long-Term Clinical Cognitive Health Outcomes in Retired Athletes: A Systematic  
1058 Review. *J Athl Train* 2020; 55: 132-158. DOI: 10.4085/1062-6050-297-18
- 1059 7. Zhang Y, Ma Y, Chen S et al. Long-Term Cognitive Performance of Retired Athletes  
1060 with Sport-Related Concussion: A Systematic Review and Meta-Analysis. *Brain Sci*  
1061 2019; 9. DOI: 10.3390/brainsci9080199
- 1062 8. Cunningham J, Broglio S, Wilson F. Influence of playing rugby on long-term brain health  
1063 following retirement: a systematic review and narrative synthesis. *BMJ Open Sport Exerc*  
1064 *Med* 2018; 4: e000356. DOI: 10.1136/bmjsem-2018-000356
- 1065 9. Lee BG, Leavitt MJ, Bernick CB et al. A Systematic Review of Positron Emission  
1066 Tomography of Tau, Amyloid Beta, and Neuroinflammation in Chronic Traumatic  
1067 Encephalopathy: The Evidence To Date. *J Neurotrauma* 2018; 35: 2015-2024. DOI:  
1068 10.1089/neu.2017.5558
- 1069 10. Vos BC, Nieuwenhuijsen K, Sluiter JK. Consequences of Traumatic Brain Injury in  
1070 Professional American Football Players: A Systematic Review of the Literature. *Clin J*  
1071 *Sport Med* 2018; 28: 91-99. DOI: 10.1097/JSM.0000000000000432
- 1072 11. Manley G, Gardner AJ, Schneider KJ et al. A systematic review of potential long-term  
1073 effects of sport-related concussion. *Br J Sports Med* 2017; 51: 969-977. DOI:  
1074 10.1136/bjsports-2017-097791
- 1075 12. Legarreta AD, Monk SH, Kirby PW et al. Long-Term Neuroimaging Findings in  
1076 American Football Players: Systematic Review. *World Neurosurg* 2018; 120: e365-e379.  
1077 DOI: 10.1016/j.wneu.2018.08.079

---

<sup>2</sup> This reference list is larger than the list in the published article because this supplement includes a more comprehensive review of the literature on chronic traumatic encephalopathy neuropathologic change and traumatic encephalopathy syndrome.

- 1078 13. Bellomo G, Piscopo P, Corbo M et al. A systematic review on the risk of  
1079 neurodegenerative diseases and neurocognitive disorders in professional and varsity  
1080 athletes. *Neurol Sci* 2022. DOI: 10.1007/s10072-022-06319-x
- 1081 14. Murray HC, Osterman C, Bell P et al. Neuropathology in chronic traumatic  
1082 encephalopathy: a systematic review of comparative post-mortem histology literature.  
1083 *Acta Neuropathol Commun* 2022; 10: 108. DOI: 10.1186/s40478-022-01413-9
- 1084 15. Iverson GL, Buttner F, Caccese JB. Age of First Exposure to Contact and Collision  
1085 Sports and Later in Life Brain Health: A Narrative Review. *Front Neurol* 2021; 12:  
1086 727089. DOI: 10.3389/fneur.2021.727089
- 1087 16. Shively SB, Priemer DS, Stein MB et al. Pathophysiology of Traumatic Brain Injury,  
1088 Chronic Traumatic Encephalopathy, and Neuropsychiatric Clinical Expression. *Psychiatr*  
1089 *Clin North Am* 2021; 44: 443-458. DOI: 10.1016/j.psc.2021.04.003
- 1090 17. Alosco ML, Culhane J, Mez J. Neuroimaging Biomarkers of Chronic Traumatic  
1091 Encephalopathy: Targets for the Academic Memory Disorders Clinic. *Neurotherapeutics*  
1092 2021; 18: 772-791. DOI: 10.1007/s13311-021-01028-3
- 1093 18. Willer BS, Haider MN, Wilber C et al. Long-Term Neurocognitive, Mental Health  
1094 Consequences of Contact Sports. *Clin Sports Med* 2021; 40: 173-186. DOI:  
1095 10.1016/j.csm.2020.08.012
- 1096 19. Albayram O, Albayram S, Mannix R. Chronic traumatic encephalopathy-a blueprint for  
1097 the bridge between neurological and psychiatric disorders. *Transl Psychiatry* 2020; 10:  
1098 424. DOI: 10.1038/s41398-020-01111-x
- 1099 20. Lesman-Segev OH, Edwards L, Rabinovici GD. Chronic Traumatic Encephalopathy: A  
1100 Comparison with Alzheimer's Disease and Frontotemporal Dementia. *Semin Neurol*  
1101 2020; 40: 394-410. DOI: 10.1055/s-0040-1715134
- 1102 21. Cantu RC, Bernick C. History of Chronic Traumatic Encephalopathy. *Semin Neurol*  
1103 2020; 40: 353-358. DOI: 10.1055/s-0040-1713622
- 1104 22. McKee AC. The Neuropathology of Chronic Traumatic Encephalopathy: The Status of  
1105 the Literature. *Semin Neurol* 2020; 40: 359-369. DOI: 10.1055/s-0040-1713632
- 1106 23. Stein TD, Crary JF. Chronic Traumatic Encephalopathy and Neuropathological  
1107 Comorbidities. *Semin Neurol* 2020; 40: 384-393. DOI: 10.1055/s-0040-1713628
- 1108 24. Brand KP, Finkel AM. A Decision-Analytic Approach to Addressing the Evidence About  
1109 Football and Chronic Traumatic Encephalopathy. *Semin Neurol* 2020; 40: 450-460. DOI:  
1110 10.1055/s-0039-1688484
- 1111 25. LoBue C, Schaffert J, Cullum CM. Chronic traumatic encephalopathy: understanding the  
1112 facts and debate. *Curr Opin Psychiatry* 2020; 33: 130-135. DOI:  
1113 10.1097/YCO.0000000000000580
- 1114 26. Iverson GL, Gardner AJ, Shultz SR et al. Chronic traumatic encephalopathy  
1115 neuropathology might not be inexorably progressive or unique to repetitive neurotrauma.  
1116 *Brain* 2019; 142: 3672-3693. DOI: 10.1093/brain/awz286
- 1117 27. Smith DH, Johnson VE, Trojanowski JQ et al. Chronic traumatic encephalopathy -  
1118 confusion and controversies. *Nat Rev Neurol* 2019; 15: 179-183. DOI: 10.1038/s41582-  
1119 018-0114-8
- 1120 28. Brett BL, Wilmoth K, Cummings P et al. The Neuropathological and Clinical Diagnostic  
1121 Criteria of Chronic Traumatic Encephalopathy: A Critical Examination in Relation to  
1122 Other Neurodegenerative Diseases. *J Alzheimers Dis* 2019; 68: 591-608. DOI:  
1123 10.3233/JAD-181058



- 1124 29. McKee AC, Cairns NJ, Dickson DW et al. The first NINDS/NIBIB consensus meeting to  
1125 define neuropathological criteria for the diagnosis of chronic traumatic encephalopathy.  
1126 *Acta Neuropathol* 2016; 131: 75-86. DOI: 10.1007/s00401-015-1515-z
- 1127 30. Bieniek KF, Cairns NJ, Crary JF et al. The Second NINDS/NIBIB Consensus Meeting to  
1128 Define Neuropathological Criteria for the Diagnosis of Chronic Traumatic  
1129 Encephalopathy. *J Neuropathol Exp Neurol* 2021; 80: 210-219. DOI:  
1130 10.1093/jnen/nlab001
- 1131 31. Kristman VL, Borg J, Godbolt AK et al. Methodological issues and research  
1132 recommendations for prognosis after mild traumatic brain injury: results of the  
1133 International Collaboration on Mild Traumatic Brain Injury Prognosis. *Arch Phys Med  
1134 Rehabil* 2014; 95: S265-277. DOI: 10.1016/j.apmr.2013.04.026
- 1135 32. Kent P, Cancelliere C, Boyle E et al. A conceptual framework for prognostic research.  
1136 *BMC Med Res Methodol* 2020; 20: 172. DOI: 10.1186/s12874-020-01050-7
- 1137 33. Doherty M. What value case reports? *Ann Rheum Dis* 1994; 53: 1-2. DOI:  
1138 10.1136/ard.53.1.1
- 1139 34. Fletcher GS. Introduction. In: *Clinical Epidemiology - The Essentials*. 6th edn.  
1140 Philadelphia: Wolters Kluwer; 2021.
- 1141 35. Lenart-Bugla M, Luc M, Pawlowski M et al. What Do We Know about Social and Non-  
1142 Social Factors Influencing the Pathway from Cognitive Health to Dementia? A  
1143 Systematic Review of Reviews. *Brain Sci* 2022; 12. DOI: 10.3390/brainsci12091214
- 1144 36. Yu JT, Xu W, Tan CC et al. Evidence-based prevention of Alzheimer's disease:  
1145 systematic review and meta-analysis of 243 observational prospective studies and 153  
1146 randomised controlled trials. *J Neurol Neurosurg Psychiatry* 2020; 91: 1201-1209. DOI:  
1147 10.1136/jnnp-2019-321913
- 1148 37. Liang JH, Lu L, Li JY et al. Contributions of Modifiable Risk Factors to Dementia  
1149 Incidence: A Bayesian Network Analysis. *J Am Med Dir Assoc* 2020; 21: 1592-1599  
1150 e1513. DOI: 10.1016/j.jamda.2020.04.006
- 1151 38. Li XY, Zhang M, Xu W et al. Midlife Modifiable Risk Factors for Dementia: A  
1152 Systematic Review and Meta-analysis of 34 Prospective Cohort Studies. *Curr Alzheimer  
1153 Res* 2019; 16: 1254-1268. DOI: 10.2174/1567205017666200103111253
- 1154 39. Guay-Gagnon M, Vat S, Forget MF et al. Sleep apnea and the risk of dementia: A  
1155 systematic review and meta-analysis. *J Sleep Res* 2022; 31: e13589. DOI:  
1156 10.1111/jsr.13589
- 1157 40. McNutt LA, Wu C, Xue X et al. Estimating the relative risk in cohort studies and clinical  
1158 trials of common outcomes. *Am J Epidemiol* 2003; 157: 940-943. DOI:  
1159 10.1093/aje/kwg074
- 1160 41. Lee EB, Kinch K, Johnson VE et al. Chronic traumatic encephalopathy is a common co-  
1161 morbidity, but less frequent primary dementia in former soccer and rugby players. *Acta  
1162 Neuropathol* 2019; 138: 389-399. DOI: 10.1007/s00401-019-02030-y
- 1163 42. Mez J, Daneshvar DH, Kiernan PT et al. Clinicopathological Evaluation of Chronic  
1164 Traumatic Encephalopathy in Players of American Football. *J Am Med Assoc* 2017; 318:  
1165 360-370. DOI: 10.1001/jama.2017.8334
- 1166 43. Schwab N, Wennberg R, Grenier K et al. Association of Position Played and Career  
1167 Duration and Chronic Traumatic Encephalopathy at Autopsy in Elite Football and  
1168 Hockey Players. *Neurology* 2021; 96: e1835-e1843. DOI:  
1169 10.1212/WNL.0000000000011668

- 1170 44. McKee AC, Stein TD, Nowinski CJ et al. The spectrum of disease in chronic traumatic  
1171 encephalopathy. *Brain* 2013; 136: 43-64.
- 1172 45. Omalu B, Bailes J, Hamilton RL et al. Emerging histomorphologic phenotypes of chronic  
1173 traumatic encephalopathy in American athletes. *Neurosurgery* 2011; 69: 173-183;  
1174 discussion 183. DOI: 10.1227/NEU.0b013e318212bc7b
- 1175 46. McKee AC, Cantu RC, Nowinski CJ et al. Chronic traumatic encephalopathy in athletes:  
1176 progressive tauopathy after repetitive head injury. *J Neuropathol Exp Neurol* 2009; 68:  
1177 709-735.
- 1178 47. Hazrati LN, Tartaglia MC, Diamandis P et al. Absence of chronic traumatic  
1179 encephalopathy in retired football players with multiple concussions and neurological  
1180 symptomatology. *Frontiers in human neuroscience* 2013; 7: 222. DOI:  
1181 10.3389/fnhum.2013.00222
- 1182 48. Mavroudis I, Kazis D, Chowdhury R et al. Post-Concussion Syndrome and Chronic  
1183 Traumatic Encephalopathy: Narrative Review on the Neuropathology, Neuroimaging and  
1184 Fluid Biomarkers. *Diagnostics (Basel)* 2022; 12. DOI: 10.3390/diagnostics12030740
- 1185 49. Bergauer A, van Osch R, van Elferen S et al. The diagnostic potential of fluid and  
1186 imaging biomarkers in chronic traumatic encephalopathy (CTE). *Biomed Pharmacother*  
1187 2022; 146: 112602. DOI: 10.1016/j.biopha.2021.112602
- 1188 50. Asken BM, Rabinovici GD. Identifying degenerative effects of repetitive head trauma  
1189 with neuroimaging: a clinically-oriented review. *Acta Neuropathol Commun* 2021; 9: 96.  
1190 DOI: 10.1186/s40478-021-01197-4
- 1191 51. Hugon J, Hourregue C, Cognat E et al. Chronic traumatic encephalopathy.  
1192 *Neurochirurgie* 2021; 67: 290-294. DOI: 10.1016/j.neuchi.2021.02.003
- 1193 52. Pierre K, Dyson K, Dagra A et al. Chronic Traumatic Encephalopathy: Update on  
1194 Current Clinical Diagnosis and Management. *Biomedicines* 2021; 9. DOI:  
1195 10.3390/biomedicines9040415
- 1196 53. Shahim P, Gill JM, Blennow K et al. Fluid Biomarkers for Chronic Traumatic  
1197 Encephalopathy. *Semin Neurol* 2020; 40: 411-419. DOI: 10.1055/s-0040-1715095
- 1198 54. Mariani M, Alosco ML, Mez J et al. Clinical Presentation of Chronic Traumatic  
1199 Encephalopathy. *Semin Neurol* 2020; 40: 370-383. DOI: 10.1055/s-0040-1713624
- 1200 55. Abdolmohammadi B, Dupre A, Evers L et al. Genetics of Chronic Traumatic  
1201 Encephalopathy. *Semin Neurol* 2020; 40: 420-429. DOI: 10.1055/s-0040-1713631
- 1202 56. Phelps A, Mez J, Stern RA et al. Risk Factors for Chronic Traumatic Encephalopathy: A  
1203 Proposed Framework. *Semin Neurol* 2020; 40: 439-449. DOI: 10.1055/s-0040-1713633
- 1204 57. Cherry JD, Babcock KJ, Goldstein LE. Repetitive Head Trauma Induces Chronic  
1205 Traumatic Encephalopathy by Multiple Mechanisms. *Semin Neurol* 2020; 40: 430-438.  
1206 DOI: 10.1055/s-0040-1713620
- 1207 58. Wolfson DI, Kuhn AW, Kerr ZY et al. Chronic traumatic encephalopathy research  
1208 viewed in the public domain: What makes headlines? *Brain Inj* 2020; 34: 528-534. DOI:  
1209 10.1080/02699052.2020.1725843
- 1210 59. Cantu R, Budson A. Management of chronic traumatic encephalopathy. *Expert Rev*  
1211 *Neurother* 2019; 19: 1015-1023. DOI: 10.1080/14737175.2019.1633916
- 1212 60. Katsumoto A, Takeuchi H, Tanaka F. Tau Pathology in Chronic Traumatic  
1213 Encephalopathy and Alzheimer's Disease: Similarities and Differences. *Front Neurol*  
1214 2019; 10: 980. DOI: 10.3389/fneur.2019.00980

- 1215 61. Turk KW, Budson AE. Chronic Traumatic Encephalopathy. *Continuum (Minneapolis)* 2019; 25: 187-207. DOI: 10.1212/CON.0000000000000686
- 1216
- 1217 62. Ruprecht R, Scheurer E, Lenz C. Systematic review on the characterization of chronic  
1218 traumatic encephalopathy by MRI and MRS. *J Magn Reson Imaging* 2019; 49: 212-228.  
1219 DOI: 10.1002/jmri.26162
- 1220 63. Nowinski CJ, Bureau SC, Buckland ME et al. Applying the Bradford Hill Criteria for  
1221 Causation to Repetitive Head Impacts and Chronic Traumatic Encephalopathy. *Front*  
1222 *Neurol* 2022; 13: 938163. DOI: 10.3389/fneur.2022.938163
- 1223 64. Stamm JM, Bourlas AP, Baugh CM et al. Age of first exposure to football and later-life  
1224 cognitive impairment in former NFL players. *Neurology* 2015; 84: 1114-1120. DOI:  
1225 10.1212/WNL.0000000000001358
- 1226 65. Iverson GL, Caccese JB, Merz ZC et al. Age of First Exposure to Football Is Not  
1227 Associated With Later-in-Life Cognitive or Mental Health Problems. *Front Neurol* 2021;  
1228 12: 647314. DOI: 10.3389/fneur.2021.647314
- 1229 66. Schultz V, Stern RA, Tripodis Y et al. Age at First Exposure to Repetitive Head Impacts  
1230 Is Associated with Smaller Thalamic Volumes in Former Professional American Football  
1231 Players. *J Neurotrauma* 2018; 35: 278-285. DOI: 10.1089/neu.2017.5145
- 1232 67. Roberts AL, Pascual-Leone A, Speizer FE et al. Exposure to American Football and  
1233 Neuropsychiatric Health in Former National Football League Players: Findings From the  
1234 Football Players Health Study. *Am J Sports Med* 2019; 47: 2871-2880. DOI:  
1235 10.1177/0363546519868989
- 1236 68. Deshpande SK, Hasegawa RB, Rabinowitz AR et al. Association of playing high school  
1237 football with cognition and mental health later in life. *JAMA Neurol* 2017; 74: 909-918.  
1238 DOI: 10.1001/jamaneurol.2017.1317
- 1239 69. Iverson GL, Terry DP. High School Football and Risk for Depression and Suicidality in  
1240 Adulthood: Findings From a National Longitudinal Study. *Front Neurol* 2022; 12:  
1241 812604. DOI: 10.3389/fneur.2021.812604
- 1242 70. Iverson GL, Merz ZC, Terry DP. Playing high school football is not associated with an  
1243 increased risk for suicidality in early adulthood. *Clin J Sport Med* 2021; 31: 469-474.
- 1244 71. Weiss J, Rabinowitz AR, Deshpande SK et al. Participation in Collision Sports and  
1245 Cognitive Aging Among Swedish Twins. *Am J Epidemiol* 2021; 190: 2604-2611. DOI:  
1246 10.1093/aje/kwab177
- 1247 72. Deshpande SK, Hasegawa RB, Weiss J et al. The association between adolescent football  
1248 participation and early adulthood depression. *PLoS One* 2020; 15: e0229978. DOI:  
1249 10.1371/journal.pone.0229978
- 1250 73. Bohr AD, Boardman JD, McQueen MB. Association of Adolescent Sport Participation  
1251 With Cognition and Depressive Symptoms in Early Adulthood. *Orthop J Sports Med*  
1252 2019; 7: 2325967119868658. DOI: 10.1177/2325967119868658
- 1253 74. Janssen PH, Mandrekar J, Mielke MM et al. High School Football and Late-Life Risk of  
1254 Neurodegenerative Syndromes, 1956-1970. *Mayo Clin Proc* 2017; 92: 66-71. DOI:  
1255 10.1016/j.mayocp.2016.09.004
- 1256 75. Savica R, Parisi JE, Wold LE et al. High school football and risk of neurodegeneration: a  
1257 community-based study. *Mayo Clinic Proceedings* 2012; 87: 335-340. DOI:  
1258 10.1016/j.mayocp.2011.12.016
- 1259 76. Porter MD. A 9-year controlled prospective neuropsychologic assessment of amateur  
1260 boxing. *Clin J Sport Med* 2003; 13: 339-352.

- 1261 77. Valenti M, Pontieri FE, Conti F et al. Amyotrophic lateral sclerosis and sports: a case-  
1262 control study. *Eur J Neurol* 2005; 12: 223-225. DOI: 10.1111/j.1468-1331.2004.00978.x
- 1263 78. Harris KM. The National Longitudinal Study of Adolescent to Adult Health (Add  
1264 Health), Waves I & II, 1994–1996; Wave III, 2001–2002; Wave IV, 2007–2009  
1265 [machine-readable data file and documentation]. . Chapel Hill, NC: Carolina Population  
1266 Center, University of North Carolina at Chapel Hill; 2009.
- 1267 79. Baron SL, Hein MJ, Lehman E et al. Body mass index, playing position, race, and the  
1268 cardiovascular mortality of retired professional football players. *Am J Cardiol* 2012; 109:  
1269 889-896. DOI: 10.1016/j.amjcard.2011.10.050
- 1270 80. Lincoln AE, Vogel RA, Allen TW et al. Risk and Causes of Death among Former  
1271 National Football League Players (1986-2012). *Med Sci Sports Exerc* 2018; 50: 486-493.  
1272 DOI: 10.1249/MSS.0000000000001466
- 1273 81. Taioli E. All causes of mortality in male professional soccer players. *Eur J Public Health*  
1274 2007; 17: 600-604. DOI: 10.1093/eurpub/ckm035
- 1275 82. Belli S, Vanacore N. Proportionate mortality of Italian soccer players: is amyotrophic  
1276 lateral sclerosis an occupational disease? *Eur J Epidemiol* 2005; 20: 237-242. DOI:  
1277 10.1007/s10654-004-6879-7
- 1278 83. Pupillo E, Bianchi E, Vanacore N et al. Increased risk and early onset of ALS in  
1279 professional players from Italian Soccer Teams. *Amyotroph Lateral Scler Frontotemporal*  
1280 *Degener* 2020; 21: 403-409. DOI: 10.1080/21678421.2020.1752250
- 1281 84. Daneshvar DH, Mez J, Alosco ML et al. Incidence of and Mortality From Amyotrophic  
1282 Lateral Sclerosis in National Football League Athletes. *JAMA Netw Open* 2021; 4:  
1283 e2138801. DOI: 10.1001/jamanetworkopen.2021.38801
- 1284 85. Brett BL, Kerr ZY, Walton SR et al. Longitudinal trajectory of depression symptom  
1285 severity and the influence of concussion history and physical function over a 19-year  
1286 period among former National Football League (NFL) players: an NFL-LONG Study. *J*  
1287 *Neurol Neurosurg Psychiatry* 2022; 93: 272-279. DOI: 10.1136/jnnp-2021-326602
- 1288 86. Russell ER, Mackay DF, Stewart K et al. Association of Field Position and Career  
1289 Length With Risk of Neurodegenerative Disease in Male Former Professional Soccer  
1290 Players. *JAMA Neurol* 2021; 78: 1057-1063. DOI: 10.1001/jamaneurol.2021.2403
- 1291 87. Russell ER, McCabe T, Mackay DF et al. Mental health and suicide in former  
1292 professional soccer players. *J Neurol Neurosurg Psychiatry* 2020; 91: 1256-1260. DOI:  
1293 10.1136/jnnp-2020-323315
- 1294 88. Kmush BL, Mackowski M, Ehrlich J et al. Association of Professional Football  
1295 Cumulative Head Impact Index Scores With All-Cause Mortality Among National  
1296 Football League Players. *JAMA Netw Open* 2020; 3: e204442. DOI:  
1297 10.1001/jamanetworkopen.2020.4442
- 1298 89. Piantella S, McDonald SJ, Maruff P et al. Assessing the Long-Term Impact of  
1299 Concussion upon Cognition: A 5-Year Prospective Investigation. *Arch Clin*  
1300 *Neuropsychol* 2020; 35: 482-490. DOI: 10.1093/arclin/acia012
- 1301 90. Mackay DF, Russell ER, Stewart K et al. Neurodegenerative Disease Mortality among  
1302 Former Professional Soccer Players. *N Engl J Med* 2019; 381: 1801-1808. DOI:  
1303 10.1056/NEJMoa1908483
- 1304 91. Nguyen VT, Zafonte RD, Chen JT et al. Mortality Among Professional American-Style  
1305 Football Players and Professional American Baseball Players. *JAMA Netw Open* 2019;  
1306 2: e194223. DOI: 10.1001/jamanetworkopen.2019.4223

- 1307 92. Lehman EJ, Hein MJ, Gersic CM. Suicide Mortality Among Retired National Football  
1308 League Players Who Played 5 or More Seasons. *Am J Sports Med* 2016; 44: 2486-2491.  
1309 DOI: 10.1177/0363546516645093
- 1310 93. Lehman EJ, Hein MJ, Baron SL et al. Neurodegenerative causes of death among retired  
1311 National Football League players. *Neurology* 2012; 79: 1970-1974. DOI:  
1312 10.1212/WNL.0b013e31826daf50
- 1313 94. Kerr ZY, Marshall SW, Harding HP, Jr. et al. Nine-year risk of depression diagnosis  
1314 increases with increasing self-reported concussions in retired professional football  
1315 players. *Am J Sports Med* 2012; 40: 2206-2212. DOI: 10.1177/0363546512456193
- 1316 95. Chio A, Benzi G, Dossena M et al. Severely increased risk of amyotrophic lateral  
1317 sclerosis among Italian professional football players. *Brain* 2005; 128: 472-476. DOI:  
1318 10.1093/brain/awh373
- 1319 96. Chio A, Calvo A, Dossena M et al. ALS in Italian professional soccer players: the risk is  
1320 still present and could be soccer-specific. *Amyotroph Lateral Scler* 2009; 10: 205-209.  
1321 DOI: 10.1080/17482960902721634
- 1322 97. Morgenstern H. Ecologic studies in epidemiology: concepts, principles, and methods.  
1323 *Annu Rev Public Health* 1995; 16: 61-81. DOI: 10.1146/annurev.pu.16.050195.000425
- 1324 98. Kerr ZY, Marshall SW, Guskiewicz KM. Reliability of concussion history in former  
1325 professional football players. *Med Sci Sports Exerc* 2012; 44: 377-382. DOI:  
1326 10.1249/MSS.0b013e31823240f2
- 1327 99. Alipour J, Payandeh A. Common errors in reporting cause-of-death statement on death  
1328 certificates: A systematic review and meta-analysis. *J Forensic Leg Med* 2021; 82:  
1329 102220. DOI: 10.1016/j.jflm.2021.102220
- 1330 100. Pritt BS, Hardin NJ, Richmond JA et al. Death certification errors at an academic  
1331 institution. *Arch Pathol Lab Med* 2005; 129: 1476-1479. DOI: 10.5858/2005-129-1476-  
1332 DCEAAA
- 1333 101. Romero JP, Benito-Leon J, Louis ED et al. Under reporting of dementia deaths on death  
1334 certificates: a systematic review of population-based cohort studies. *J Alzheimers Dis*  
1335 2014; 41: 213-221. DOI: 10.3233/JAD-132765
- 1336 102. Martland HS. Punch drunk. *J Am Med Assoc* 1928; 91: 1103-1107.
- 1337 103. Millsbaugh JA. Dementia pugilistica. *US Naval Medicine Bulletin* 1937; 35: 297-303.
- 1338 104. Bowman KM, Blau AD. Psychotic states following head and brain injury in adults and  
1339 children. In: Brock S, ed. *Injuries of the skull, brain and spinal cord: Neuro-psychiatric,*  
1340 *surgical, and medico-legal aspects.* Williams & Wilkins Co.; 1940: 309-360.
- 1341 105. Critchley M. Medical aspects of boxing, particularly from a neurological standpoint. *Br*  
1342 *Med J* 1957; 1: 357-362.
- 1343 106. Critchley M. Punch-drunken syndromes: the chronic traumatic encephalopathy of boxers.  
1344 In: Maloine, ed. *Hommage a Clovis Vincent.* Strasbourg: Imprimerie Alascienne; 1949:  
1345 131-145.
- 1346 107. Corsellis JA, Bruton CJ, Freeman-Browne D. The aftermath of boxing. *Psychol Med*  
1347 1973; 3: 270-303.
- 1348 108. Goldfinger MH, Ling H, Tilley BS et al. The aftermath of boxing revisited: identifying  
1349 chronic traumatic encephalopathy pathology in the original Corsellis boxer series. *Acta*  
1350 *Neuropathol* 2018; 136: 973-974. DOI: 10.1007/s00401-018-1926-8
- 1351 109. Omalu BI, DeKosky ST, Minster RL et al. Chronic traumatic encephalopathy in a  
1352 National Football League player. *Neurosurgery* 2005; 57: 128-134; discussion 128-134.

- 1353 110. Omalu BI, DeKosky ST, Hamilton RL et al. Chronic traumatic encephalopathy in a  
1354 national football league player: part II. *Neurosurgery* 2006; 59: 1086-1092; discussion  
1355 1092-1083.
- 1356 111. Bieniek KF, Ross OA, Cormier KA et al. Chronic traumatic encephalopathy pathology in  
1357 a neurodegenerative disorders brain bank. *Acta Neuropathol* 2015; 130: 877-889. DOI:  
1358 10.1007/s00401-015-1502-4
- 1359 112. McCann H, Bahar AY, Burkhardt K et al. Prevalence of chronic traumatic  
1360 encephalopathy in the Sydney Brain Bank. *Brain Commun* 2022; 4: fcac189. DOI:  
1361 10.1093/braincomms/fcac189
- 1362 113. Postupna N, Rose SE, Gibbons LE et al. The Delayed Neuropathological Consequences  
1363 of Traumatic Brain Injury in a Community-Based Sample. *Front Neurol* 2021; 12:  
1364 624696. DOI: 10.3389/fneur.2021.624696
- 1365 114. Forrest SL, Kril JJ, Wagner S et al. Chronic Traumatic Encephalopathy (CTE) Is Absent  
1366 From a European Community-Based Aging Cohort While Cortical Aging-Related Tau  
1367 Astroglialopathy (ARTAG) Is Highly Prevalent. *J Neuropathol Exp Neurol* 2019; 78: 398-  
1368 405. DOI: 10.1093/jnen/nlz017
- 1369 115. Suter CM, Affleck AJ, Lee M et al. Chronic Traumatic Encephalopathy in a Routine  
1370 Neuropathology Service in Australia. *J Neuropathol Exp Neurol* 2022; 81: 790-795. DOI:  
1371 10.1093/jnen/nlac071
- 1372 116. Priemer DS, Iacono D, Rhodes CH et al. Chronic Traumatic Encephalopathy in the  
1373 Brains of Military Personnel. *N Engl J Med* 2022; 386: 2169-2177. DOI:  
1374 10.1056/NEJMoa2203199
- 1375 117. Kovacs GG, Xie SX, Lee EB et al. Multisite Assessment of Aging-Related Tau  
1376 Astroglialopathy (ARTAG). *J Neuropathol Exp Neurol* 2017; 76: 605-619. DOI:  
1377 10.1093/jnen/nlx041
- 1378 118. Crary JF, Trojanowski JQ, Schneider JA et al. Primary age-related tauopathy (PART): a  
1379 common pathology associated with human aging. *Acta Neuropathol* 2014; 128: 755-766.  
1380 DOI: 10.1007/s00401-014-1349-0
- 1381 119. Hill AB. The environment and disease: Association or causation? *Proceedings of the*  
1382 *Royal Society of Medicine* 1965; 58: 295-300.
- 1383 120. Montenegro PH, Baugh CM, Daneshvar DH et al. Clinical subtypes of chronic traumatic  
1384 encephalopathy: literature review and proposed research diagnostic criteria for traumatic  
1385 encephalopathy syndrome. *Alzheimers Res Ther* 2014; 6: 68. DOI: 10.1186/s13195-014-  
1386 0068-z
- 1387 121. Iverson GL, Merz ZC, Terry DP. Examining the Research Criteria for Traumatic  
1388 Encephalopathy Syndrome in Middle-Aged Men From the General Population Who  
1389 Played Contact Sports in High School. *Front Neurol* 2021; 12: 632618. DOI:  
1390 10.3389/fneur.2021.632618
- 1391 122. Iverson GL, Gardner AJ. Symptoms of traumatic encephalopathy syndrome are common  
1392 in the US general population. *Brain Commun* 2021; 3: fcab001. DOI:  
1393 10.1093/braincomms/fcab001
- 1394 123. Iverson GL, Gardner AJ. Risk for misdiagnosing chronic traumatic encephalopathy in  
1395 men with anger control problems. *Front Neurol* 2020; 11: 739. DOI:  
1396 10.3389/fneur.2020.00739

- 1397 124. Iverson GL, Gardner AJ. Risk of Misdiagnosing Chronic Traumatic Encephalopathy in  
1398 Men With Depression. *J Neuropsychiatry Clin Neurosci* 2020; 32: 139-146. DOI:  
1399 10.1176/appi.neuropsych.19010021
- 1400 125. Mez J, Alosco ML, Daneshvar DH et al. Validity of the 2014 traumatic encephalopathy  
1401 syndrome criteria for CTE pathology. *Alzheimers Dement* 2021; 17: 1709-1724. DOI:  
1402 10.1002/alz.12338
- 1403 126. Katz DI, Bernick C, Dodick DW et al. National Institute of Neurological Disorders and  
1404 Stroke Consensus Diagnostic Criteria for Traumatic Encephalopathy Syndrome.  
1405 *Neurology* 2021; 96: 848-863. DOI: 10.1212/WNL.0000000000011850
- 1406 127. Roberts A. Brain damage in boxers: A study of prevalence of traumatic encephalopathy  
1407 among ex-professional boxers. London: Pitman Medical Scientific Publishing Co.; 1969.
- 1408 128. Hof PR, Knabe R, Bovier P et al. Neuropathological observations in a case of autism  
1409 presenting with self-injury behavior. *Acta Neuropathol* 1991; 82: 321-326.
- 1410 129. Geddes JF, Vowles GH, Nicoll JA et al. Neuronal cytoskeletal changes are an early  
1411 consequence of repetitive head injury. *Acta Neuropathol (Berl)* 1999; 98: 171-178.
- 1412 130. Jordan B. Chronic traumatic brain injury associated with boxing. *Semin Neurol* 2000; 20:  
1413 179-185.
- 1414 131. Shively SB, Edgerton SL, Iacono D et al. Localized cortical chronic traumatic  
1415 encephalopathy pathology after single, severe axonal injury in human brain. *Acta*  
1416 *Neuropathol* 2017; 133: 353-366. DOI: 10.1007/s00401-016-1649-7
- 1417 132. Puvenna V, Engeler M, Banjara M et al. Is phosphorylated tau unique to chronic  
1418 traumatic encephalopathy? Phosphorylated tau in epileptic brain and chronic traumatic  
1419 encephalopathy. *Brain Res* 2016; 1630: 225-240. DOI: 10.1016/j.brainres.2015.11.007
- 1420 133. Fournier CN, Gearing M, Upadhyayula SR et al. Head injury does not alter disease  
1421 progression or neuropathologic outcomes in ALS. *Neurology* 2015; 84: 1788-1795. DOI:  
1422 10.1212/WNL.0000000000001522
- 1423 134. Koga S, Dickson DW, Bieniek KF. Chronic Traumatic Encephalopathy Pathology in  
1424 Multiple System Atrophy. *J Neuropathol Exp Neurol* 2016; 75: 963-970. DOI:  
1425 10.1093/jnen/nlw073
- 1426 135. Ling H, Holton JL, Shaw K et al. Histological evidence of chronic traumatic  
1427 encephalopathy in a large series of neurodegenerative diseases. *Acta Neuropathol* 2015;  
1428 130: 891-893. DOI: 10.1007/s00401-015-1496-y
- 1429 136. Noy S, Krawitz S, Del Bigio MR. Chronic Traumatic Encephalopathy-Like  
1430 Abnormalities in a Routine Neuropathology Service. *J Neuropathol Exp Neurol* 2016; 75:  
1431 1145-1154. DOI: 10.1093/jnen/nlw092
- 1432 137. Arena JD, Johnson VE, Lee EB et al. Astroglial tau pathology alone preferentially  
1433 concentrates at sulcal depths in chronic traumatic encephalopathy neuropathologic  
1434 change. *Brain Commun* 2020; 2: fcaa210. DOI: 10.1093/braincomms/fcaa210
- 1435 138. Ameen-Ali KE, Bretzin A, Lee EB et al. Detection of astrocytic tau pathology facilitates  
1436 recognition of chronic traumatic encephalopathy neuropathologic change. *Acta*  
1437 *Neuropathol Commun* 2022; 10: 50. DOI: 10.1186/s40478-022-01353-4
- 1438 139. Butler M, Dixon E, Stein TD et al. Tau Pathology in Chronic Traumatic Encephalopathy  
1439 is Primarily Neuronal. *J Neuropathol Exp Neurol* 2022; 81: 773-780. DOI:  
1440 10.1093/jnen/nlac065
- 1441
